# Supplementary material
Source: publisher figshare collection journal article supplement (https://acs.figshare.com/ndownloader/files/9118042)
Supplement: Supplementary file 1 [file 9118042]

## Supporting Information

### Trifluoromethylthiolation-Based Bifunctionalization of Diazocarbonyl Compounds by Rhodium Catalysis

Marvin Lübcke,<sup>ab</sup> Weiming Yuan<sup>a</sup> and Kálmán J. Szabó<sup>\*ab</sup>

<sup>a</sup> Department of Organic Chemistry, Stockholm University  
Arrhenius Laboratory, SE-106 91 Stockholm, Sweden

<sup>b</sup> Stockholm Brain Institute, Karolinska Institutet, SE-171 77 Stockholm, Sweden

E-mail: kalman.j.szabo@su.se

#### **Contents:**

|                 |                                                                                                               |
|-----------------|---------------------------------------------------------------------------------------------------------------|
| <b>Page S2</b>  | General information                                                                                           |
| <b>Page S3</b>  | Synthesis and characterization                                                                                |
| <b>Page S14</b> | Attempted cleavage of epoxides                                                                                |
| <b>Page S15</b> | Mechanistical aspects: competitive fluorination vs. trifluoromethylthiolation<br>and proposed catalytic cycle |
| <b>Page S17</b> | <sup>1</sup> H NMR, <sup>13</sup> C NMR and <sup>19</sup> F NMR spectra                                       |
| <b>Page S95</b> | References                                                                                                    |

## General Information

Diazo compounds **2** were prepared according to literature procedures.<sup>1-3</sup> Trifluoromethylthiolating reagent **1** was synthesized according to a procedure by Shen and co-workers.<sup>4</sup> Reagents were used as obtained from commercial suppliers without further purification. Dry CDCl<sub>3</sub> was used as obtained from a commercial supplier (Sigma-Aldrich). Dry CH<sub>2</sub>Cl<sub>2</sub> was obtained from a solvent drying system (VAC Solvent Purifier from Vacuum Atmospheres). Flash chromatography was carried out on 60 Å (35-70 µm) silica gel (Davisil by Grace Discovery Sciences)) using petroleum ether / Et<sub>2</sub>O or petroleum ether / CH<sub>2</sub>Cl<sub>2</sub> mixtures as eluent. Analytical TLC was carried out on aluminum-backed plates (1.5 Å, ~ 5 cm) pre-coated (0.25 mm) with silica gel (Merck, Silica Gel 60 F254). Compounds were visualized by exposure to UV light or by dipping the plates in a solution of 0.75% KMnO<sub>4</sub> (w/v) in an aqueous solution of K<sub>2</sub>CO<sub>3</sub> 0.36 M. Melting points were recorded in a metal block and are uncorrected. <sup>1</sup>H NMR spectra were recorded at 400 MHz; <sup>13</sup>C NMR spectra were recorded at 100 MHz, <sup>19</sup>F NMR spectra were recorded at 377 MHz with a Bruker Advance spectrometer. <sup>1</sup>H and <sup>13</sup>C NMR chemical shifts (δ) are reported in ppm from tetramethylsilane, using the residual solvent resonance (CHCl<sub>3</sub>: δ<sub>H</sub> 7.26 and CDCl<sub>3</sub>: δ<sub>C</sub> 77.0) as an internal reference. Coupling constants (*J*) are given in Hz. High-resolution mass spectra (HRMS) were recorded with a Bruker microTOF ESI-TOF mass spectrometer.

## Experimental procedures and spectroscopic data

**General procedure A for the multicomponent reaction of diazo compounds **2** with alcohols **3** and trifluoromethylthio reagent **1**.**

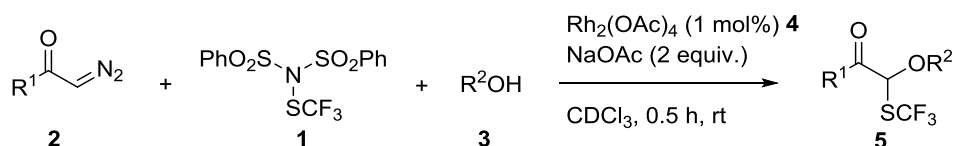

(PhSO<sub>2</sub>)<sub>2</sub>NSCF<sub>3</sub> (**1**) (40 mg, 0.1 mmol, 1.0 equiv.), Rh<sub>2</sub>(OAc)<sub>4</sub> (**4**) (0.5 mg, 0.001 mmol, 0.01 equiv.) and anhydrous NaOAc (16 mg, 0.2 mmol, 2.0 equiv.) were placed to a vial under ambient conditions. Then, diazo compound **2** (0.12 mmol, 1.2 equiv.) and the corresponding alcohol **3** (0.4 mmol, 4.0 equiv.) in 1.5 mL of dry CDCl<sub>3</sub> were added under Ar. The reaction mixture was stirred for 30 minutes in the sealed vial, then the reaction mixture was purified by silica gel chromatography to obtain products **5**.

**General procedure B for the multicomponent reaction of diazo compounds **2** with ethers **6**, **7c** and reagent **1**.**

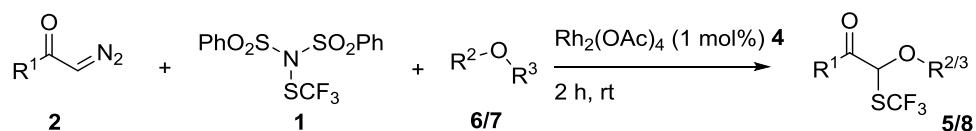

(PhSO<sub>2</sub>)<sub>2</sub>NSCF<sub>3</sub> (**1**) (40 mg, 0.1 mmol, 1.0 equiv.) and Rh<sub>2</sub>(OAc)<sub>4</sub> (**4**) (0.5 mg, 0.001 mmol, 0.01 equiv.) were placed to a vial under ambient conditions. Then, diazo compound **2** (0.12 mmol, 1.2 equiv.) in 1 mL of the appropriate ether **6** or **7c** were added under Ar. The reaction mixture was stirred for 2 h in the sealed vial, then the reaction mixture was purified by silica gel chromatography.

**General procedure C for the multicomponent reaction of diazo compounds **2** with THF **7a-b** and reagent **1**.**

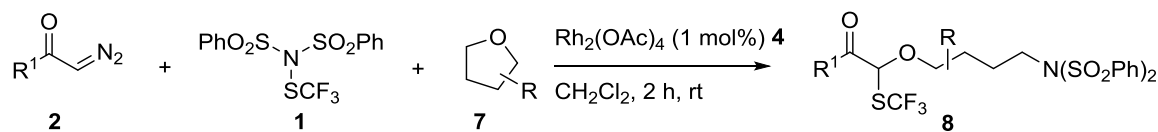

(PhSO<sub>2</sub>)<sub>2</sub>NSCF<sub>3</sub> (**1**) (40 mg, 0.1 mmol, 1.0 equiv.) and Rh<sub>2</sub>(OAc)<sub>4</sub> (**4**) (0.5 mg, 0.001 mmol,

0.01 equiv.) were placed to a vial under ambient conditions. Then, diazo compound **2** (0.12 mmol, 1.2 equiv.) and THF **7** (0.6 mmol, 6 equiv.) in 1 mL of dry CH<sub>2</sub>Cl<sub>2</sub> were added under Ar. The reaction mixture was stirred for 2 h in the sealed vial, then the reaction mixture was purified by silica gel chromatography.

### 2-(benzyloxy)-1-phenyl-2-((trifluoromethyl)thio)ethan-1-one (**5a**)

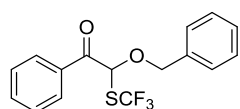

Title compound **5a** was prepared according to general procedure A and purified by column chromatography (SiO<sub>2</sub>; petroleum ether / Et<sub>2</sub>O, 16:1) affording **5a** as a colorless oil (23 mg, 71%). <sup>1</sup>H NMR (400 MHz, CDCl<sub>3</sub>): δ = 8.07-8.03 (m, 2H), 7.67-7.62 (m, 1H), 7.53-7.47 (m, 2H), 7.34-7.29 (m, 3H), 7.26-7.22 (m, 2H), 6.59 (s, 1H), 4.86 (d, *J* = 11.0 Hz, 1H), 4.56 (d, *J* = 11.0 Hz, 1H); <sup>13</sup>C NMR (100 MHz, CDCl<sub>3</sub>): δ = 191.4, 135.7, 134.8, 133.1, 130.3 (q, *J*(C,F) = 308.2 Hz), 129.6, 129.1, 128.7, 128.6, 128.5, 87.1 (q, *J*(C,F) = 1.6 Hz), 69.2; <sup>19</sup>F NMR (377 MHz, CDCl<sub>3</sub>): δ = -38.47; HRMS (ESI): *m/z* calcd. for C<sub>16</sub>H<sub>13</sub>O<sub>2</sub>F<sub>3</sub>S+Na<sup>+</sup>: 349.0481 [*M*+Na]<sup>+</sup>; found: 349.0463.

### 2-(benzyloxy)-1-phenyl-2-((trifluoromethyl)thio)ethan-1-one (**5a**) at 1.0 mmol scale

The above preparation of **5a** was repeated at 1.0 mmol scale: (PhSO<sub>2</sub>)<sub>2</sub>NSCF<sub>3</sub> (**1**) (413 mg, 1.0 mmol, 1.0 equiv.), Rh<sub>2</sub>(OAc)<sub>4</sub> (**4**) (4.9 mg, 0.01 mmol, 0.01 equiv.) and anhydrous NaOAc (169 mg, 2.0 mmol, 2.0 equiv.) were placed in a 25 mL Schlenk tube under ambient conditions. Then, diazo compound **2a** (189 mg, 1.2 mmol, 1.2 equiv.) and benzyl alcohol **3a** (433 mg, 4.0 mmol, 4.0 equiv.) dissolved together in 15 mL dry CDCl<sub>3</sub> were added under Ar. This reaction mixture was stirred for 30 minutes at 25 °C, then the solvent was removed under reduced pressure. The crude mixture was purified by silica gel chromatography (SiO<sub>2</sub>; petroleum ether / Et<sub>2</sub>O, 16:1) to obtain product **5a** (229 mg, 67% yield).

### 2-(naphthalen-2-ylmethoxy)-1-phenyl-2-((trifluoromethyl)thio)ethan-1-one (**5b**)

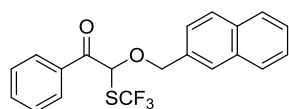

Title compound **5b** was prepared according to general procedure A and purified by column chromatography (SiO<sub>2</sub>; petroleum ether / Et<sub>2</sub>O, 16:1) affording **5b** as a colorless oil (25 mg, 67%). <sup>1</sup>H NMR (400 MHz, CDCl<sub>3</sub>): δ = 8.07-8.03 (m, 2H), 7.83-7.76 (m, 3H), 7.72-7.69 (m, 1H), 7.66-7.61 (m, 1H), 7.51-7.45 (m, 4H), 7.34 (dd, *J* = 8.4 Hz, 1.7 Hz, 1H), 6.63 (s, 1H), 5.02 (d, *J* = 11.1 Hz, 1H), 4.74 (d, *J* = 11.1 Hz, 1H); <sup>13</sup>C NMR (100 MHz, CDCl<sub>3</sub>): δ = 191.4, 134.7, 133.3, 133.3, 133.1, 133.1, 130.4 (q, *J*(C,F) = 308.2 Hz), 129.6, 129.1, 128.6, 128.1, 127.8, 127.7, 126.5, 126.4, 125.8, 87.0 (q, *J*(C,F) = 1.6 Hz), 69.3; <sup>19</sup>F NMR (377 MHz, CDCl<sub>3</sub>): δ = -38.39; HRMS

(ESI):  $m/z$  calcd. for  $C_{20}H_{15}O_2F_3S+Na^+$ : 399.0637  $[M+Na]^+$ ; found: 399.0653.

### 2-((2-bromobenzyl)oxy)-1-phenyl-2-((trifluoromethyl)thio)ethan-1-one (5c)

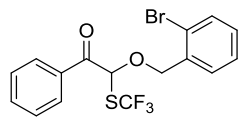

Title compound **5c** was prepared according to general procedure A and purified by column chromatography ( $SiO_2$ ; petroleum ether /  $Et_2O$ , 16:1) affording **5c** as a colorless oil (20 mg, 50%).  $^1H$  NMR (400 MHz,  $CDCl_3$ ):  $\delta$  = 8.10-8.06 (m, 2H), 7.67-7.61 (m, 1H), 7.54-7.47 (m, 3H), 7.40-7.36 (m, 1H), 7.31-7.25 (m, 1H), 7.18-7.13 (m, 1H), 6.62 (s, 1H), 4.89 (d,  $J$  = 11.8 Hz, 1H), 4.72 (d,  $J$  = 11.8 Hz, 1H);  $^{13}C$  NMR (100 MHz,  $CDCl_3$ ):  $\delta$  = 191.1, 135.3, 134.8, 133.0, 132.8, 130.3 (q,  $J(C,F)$  = 308.3 Hz), 130.1, 129.9, 129.7, 129.1, 128.7, 127.7, 87.4 (q,  $J(C,F)$  = 1.6 Hz), 68.8;  $^{19}F$  NMR (377 MHz,  $CDCl_3$ ):  $\delta$  = -38.52; HRMS (ESI):  $m/z$  calcd. for  $C_{16}H_{12}O_2F_3S^{79}Br+Na^+$ : 426.9586  $[M+Na]^+$ ; found: 426.9573.

### 2-((4-nitrobenzyl)oxy)-1-phenyl-2-((trifluoromethyl)thio)ethan-1-one (5d)

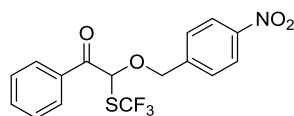

Title compound **5d** was prepared according to general procedure A and purified by column chromatography ( $SiO_2$ ; petroleum ether /  $Et_2O$ , 16:1) affording **5d** as a yellowish oil (13 mg, 33%).  $^1H$  NMR (400 MHz,  $CDCl_3$ ):  $\delta$  = 8.19-8.14 (m, 2H), 8.09-8.04 (m, 2H), 7.70-7.65 (m, 1H), 7.56-7.50 (m, 2H), 7.44-7.39 (m, 2H), 6.73 (s, 1H), 4.97 (d,  $J$  = 12.2 Hz, 1H), 4.63 (d,  $J$  = 12.2 Hz, 1H);  $^{13}C$  NMR (100 MHz,  $CDCl_3$ ):  $\delta$  = 191.1, 147.9, 143.2, 135.1, 132.8, 130.2 (q,  $J(C,F)$  = 308.3 Hz), 129.5, 129.3, 128.4, 123.8, 87.1 (q,  $J(C,F)$  = 1.5 Hz), 67.4;  $^{19}F$  NMR (377 MHz,  $CDCl_3$ ):  $\delta$  = -38.66; HRMS (ESI):  $m/z$  calcd. for  $C_{16}H_{12}O_4NF_3S+Na^+$ : 394.0331  $[M+Na]^+$ ; found: 394.0324.

### 2-(benzo[d][1,3]dioxol-5-ylmethoxy)-1-phenyl-2-((trifluoromethyl)thio)ethan-1-one (5e)

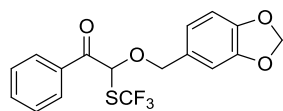

Title compound **5e** was prepared according to general procedure A and purified by column chromatography ( $SiO_2$ ; petroleum ether /  $Et_2O$ , 16:1) affording **5e** as a colorless oil (24 mg, 58%).  $^1H$  NMR (400 MHz,  $CDCl_3$ ):  $\delta$  = 8.07-8.01 (m, 2H), 7.68-7.62 (m, 1H), 7.54-7.47 (m, 2H), 6.75-6.67 (m, 3H), 6.56 (s, 1H), 5.95-5.92 (m, 2H), 4.75 (d,  $J$  = 10.8 Hz, 1H), 4.46 (d,  $J$  = 10.8 Hz, 1H);  $^{13}C$  NMR (100 MHz,  $CDCl_3$ ):  $\delta$  = 191.5, 148.0, 147.9, 134.7, 133.1, 130.3 (q,  $J(C,F)$  = 308.2 Hz), 129.6, 129.3, 129.1, 122.6, 109.2, 108.3, 101.3, 86.8 (q,  $J(C,F)$  = 1.5 Hz), 69.1;  $^{19}F$  NMR (377 MHz,  $CDCl_3$ ):  $\delta$  = -38.45; HRMS (ESI):  $m/z$  calcd. for  $C_{17}H_{13}O_4F_3S+Na^+$ : 393.0379  $[M+Na]^+$ ; found: 393.0387.

## 2-(hexyloxy)-1-phenyl-2-((trifluoromethyl)thio)ethan-1-one (5f)

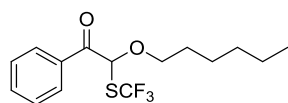

Title compound **5f** was prepared according to general procedure A and purified by column chromatography (SiO<sub>2</sub>; petroleum ether / Et<sub>2</sub>O, 16:1) affording **5f** as a colorless oil (22 mg, 68%). <sup>1</sup>H NMR (400 MHz, CDCl<sub>3</sub>): δ = 8.10-8.06 (m, 2H), 7.67-7.62 (m, 1H), 7.54-7.48 (m, 2H), 6.50 (s, 1H), 3.76 (dt, *J* = 9.0 Hz, 6.4 Hz, 1H), 3.49 (dt, *J* = 9.0 Hz, 6.4 Hz, 1H), 1.61-1.53 (m, 2H), 1.34-1.15 (m, 6H), 0.84 (t, *J* = 6.9 Hz, 3H); <sup>13</sup>C NMR (100 MHz, CDCl<sub>3</sub>): δ = 191.7, 134.7, 133.1, 130.5 (q, *J*(C,F) = 307.9 Hz), 129.6, 128.9, 88.2 (q, *J*(C,F) = 1.5 Hz), 67.4, 31.5, 29.2, 25.6, 22.6, 14.1; <sup>19</sup>F NMR (377 MHz, CDCl<sub>3</sub>): δ = -38.68; HRMS (ESI): *m/z* calcd. for C<sub>15</sub>H<sub>19</sub>O<sub>2</sub>F<sub>3</sub>S+Na<sup>+</sup>: 343.0950 [*M*+Na]<sup>+</sup>; found: 343.0955.

## 2-(cycloheptyloxy)-1-phenyl-2-((trifluoromethyl)thio)ethan-1-one (5g)

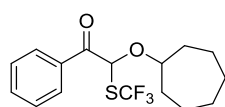

Title compound **5g** was prepared according to general procedure A and purified by column chromatography (SiO<sub>2</sub>; petroleum ether / Et<sub>2</sub>O, 16:1) affording **5g** as a colorless oil (20 mg, 54%). <sup>1</sup>H NMR (400 MHz, CDCl<sub>3</sub>): δ = 8.09-8.04 (m, 2H), 7.65-7.59 (m, 1H), 7.53-7.46 (m, 2H), 6.13 (s, 1H), 4.03 (tt, *J* = 8.1 Hz, 4.4 Hz, 1H), 1.94-1.84 (m, 2H), 1.75-1.57 (m, 4H), 1.56-1.47 (m, 4H), 1.42-1.32 (m, 2H); <sup>13</sup>C NMR (100 MHz, CDCl<sub>3</sub>): δ = 191.2, 134.1, 133.2, 130.3 (q, *J*(C,F) = 308.3 Hz), 129.8, 128.8, 85.8 (q, *J*(C,F) = 1.4 Hz), 80.1, 34.7, 33.2, 28.4, 28.4, 22.9, 22.6; <sup>19</sup>F NMR (377 MHz, CDCl<sub>3</sub>): δ = -38.51; HRMS (ESI): *m/z* calcd. for C<sub>16</sub>H<sub>19</sub>O<sub>2</sub>F<sub>3</sub>S+Na<sup>+</sup>: 355.0950 [*M*+Na]<sup>+</sup>; found: 355.0953.

## 2-(((1*R*,2*S*,5*R*)-2-isopropyl-5-methylcyclohexyl)oxy)-1-phenyl-2-((trifluoromethyl)thio)ethan-1-one (5h)

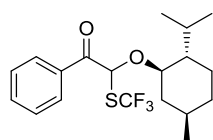

Title compound **5h** was prepared according to general procedure A and purified by column chromatography (SiO<sub>2</sub>; petroleum ether / Et<sub>2</sub>O, 16:1) affording **5h** as a colorless oil (17 mg, 46%, dr = 1:1.4). As a mixture of two diastereoisomers: <sup>1</sup>H NMR (400 MHz, CDCl<sub>3</sub>): δ = 8.08-8.00 (m, 2H), 7.65-7.59 (m, 1H), 7.52-7.46 (m, 2H), 6.06 & 6.00 (s, 1H), 3.71 & 3.51 (td, *J* = 10.6 Hz, 4.3 Hz, 1H), 2.31-1.95 (m, 2H), 1.73-1.60 (m, 2H), 1.45-1.27 (m, 2H), 1.15-0.97 (m, 1H), 0.96-0.90 (m, 5H), 0.88-0.80 (m, 4H), 0.64-0.60 (m, 1H); <sup>13</sup>C NMR (100 MHz, CDCl<sub>3</sub>): δ = 190.5 (major) & 190.9 (minor), 134.2 (major) & 134.3 (minor), 132.9 (major) & 133.0 (minor), 130.2 (q, *J*(C,F) = 308.3 Hz, major), 130.1 (q, *J*(C,F) = 308.7 Hz, minor), 129.8 (major) & 129.8 (minor), 128.9 (major) & 128.9 (minor), 84.7 (q, *J*(C,F) = 1.3 Hz, major) & 86.2 (q, *J*(C,F) = 1.5 Hz, minor),

78.8 (major) & 82.0 (minor), 47.9 (major) & 48.7 (minor), 39.3 (major) & 41.3 (minor), 34.3 (major) & 34.2 (minor), 31.6 (major) & 31.8 (minor), 25.5 (major) & 25.3 (minor), 23.0 (major) & 23.0 (minor), 22.3 (major) & 22.3 (minor), 21.2 (major) & 21.2 (minor), 15.9 (major) & 15.8 (minor);  $^{19}\text{F}$  NMR (377 MHz,  $\text{CDCl}_3$ ):  $\delta$  = -38.27 (major), -38.62 (minor); HRMS (ESI):  $m/z$  calcd. for  $\text{C}_{19}\text{H}_{25}\text{O}_2\text{F}_3\text{S}+\text{Na}^+$ : 397.1420  $[M+\text{Na}]^+$ ; found: 397.1427.

### 2-((3-methylbut-2-en-1-yl)oxy)-1-phenyl-2-((trifluoromethyl)thio)ethan-1-one (**5i**)

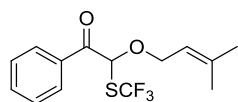

Title compound **5i** was prepared according to general procedure A and purified by column chromatography ( $\text{SiO}_2$ ; petroleum ether /  $\text{Et}_2\text{O}$ , 16:1) affording **5i** as a colorless oil (21 mg, 66%).  $^1\text{H}$  NMR (400 MHz,  $\text{CDCl}_3$ ):  $\delta$  = 8.09-8.05 (m, 2H), 7.66-7.61 (m, 1H), 7.53-7.47 (m, 2H), 6.50 (s, 1H), 5.25 (tdt,  $J$  = 7.2 Hz, 2.9 Hz, 1.5 Hz, 1H), 4.30 (dd,  $J$  = 11.2 Hz, 7.2 Hz, 1H), 4.08 (dd,  $J$  = 11.2 Hz, 7.2 Hz, 1H), 1.70 (s, 3H), 1.58 (s, 3H);  $^{13}\text{C}$  NMR (100 MHz,  $\text{CDCl}_3$ ):  $\delta$  = 191.8, 140.5, 134.6, 133.2, 130.4 (q,  $J(\text{C},\text{F})$  = 308.0 Hz), 129.6, 129.0, 118.8, 87.2 (q,  $J(\text{C},\text{F})$  = 1.6 Hz), 63.8, 25.9, 18.1;  $^{19}\text{F}$  NMR (377 MHz,  $\text{CDCl}_3$ ):  $\delta$  = -38.62; HRMS (ESI):  $m/z$  calcd. for  $\text{C}_{14}\text{H}_{15}\text{O}_2\text{F}_3\text{S}+\text{Na}^+$ : 327.0637  $[M+\text{Na}]^+$ ; found: 327.0650.

### 2-((4-bromobenzyl)oxy)-1-(p-tolyl)-2-((trifluoromethyl)thio)ethan-1-one (**5j**)

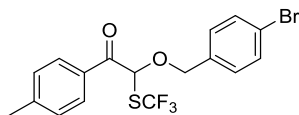

Title compound **5j** was prepared according to general procedure A and purified by column chromatography ( $\text{SiO}_2$ ; petroleum ether /  $\text{Et}_2\text{O}$ , 20:1) affording **5j** as a colorless oil (21 mg, 49%).  $^1\text{H}$  NMR (400 MHz,  $\text{CDCl}_3$ ):  $\delta$  = 7.97-7.92 (m, 2H), 7.45-7.41 (m, 2H), 7.32-7.28 (m, 2H), 7.13-7.09 (m, 2H), 6.62 (s, 1H), 4.80 (d,  $J$  = 11.2 Hz, 1H), 4.46 (d,  $J$  = 11.2 Hz, 1H), 2.44 (s, 3H);  $^{13}\text{C}$  NMR (100 MHz,  $\text{CDCl}_3$ ):  $\delta$  = 190.9, 146.2, 134.9, 131.8, 130.5, 130.4 (q,  $J(\text{C},\text{F})$  = 308.2 Hz), 130.0, 129.9, 129.7, 122.5, 87.2 (q,  $J(\text{C},\text{F})$  = 1.5 Hz), 68.0, 22.0;  $^{19}\text{F}$  NMR (377 MHz,  $\text{CDCl}_3$ ):  $\delta$  = -38.60; HRMS (ESI):  $m/z$  calcd. for  $\text{C}_{17}\text{H}_{14}\text{O}_2\text{F}_3\text{S}^{79}\text{Br}+\text{Na}^+$ : 440.9748  $[M+\text{Na}]^+$ ; found: 440.9749.

### 2-(benzyloxy)-1-cyclopentyl-2-((trifluoromethyl)thio)ethan-1-one (**5k**)

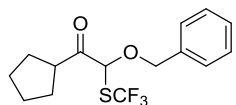

Title compound **5k** was prepared according to general procedure A and purified by column chromatography ( $\text{SiO}_2$ ; petroleum ether /  $\text{Et}_2\text{O}$ , 16:1) affording **5k** as a colorless oil (21 mg, 63%).  $^1\text{H}$  NMR (400 MHz,  $\text{CDCl}_3$ ):  $\delta$  = 7.42-7.32 (m, 5H), 5.49 (s, 1H), 4.86 (d,  $J$  = 11.6 Hz, 1H), 4.70 (d,  $J$  = 11.8 Hz, 1H), 1.93-1.52 (m, 8H);  $^{13}\text{C}$  NMR (100 MHz,  $\text{CDCl}_3$ ):  $\delta$  = 205.0, 135.6, 130.1 (q,  $J(\text{C},\text{F})$  =

308.4 Hz), 128.8, 128.7, 128.4, 86.6 (q,  $J(\text{C},\text{F}) = 1.2$  Hz), 70.6, 47.1, 30.1, 29.7, 26.3, 26.2;  $^{19}\text{F}$  NMR (377 MHz,  $\text{CDCl}_3$ ):  $\delta = -37.56$ ; HRMS (ESI):  $m/z$  calcd. for  $\text{C}_{15}\text{H}_{17}\text{O}_2\text{F}_3\text{S}+\text{Na}^+$ : 341.0799 [ $M+\text{Na}$ ] $^+$ ; found: 341.0793.

### 1-(benzyloxy)-1-((trifluoromethyl)thio)undecan-2-one (5l)

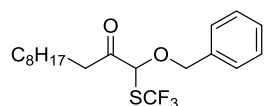

Title compound **5l** was prepared according to general procedure A and purified by column chromatography ( $\text{SiO}_2$ ; petroleum ether /  $\text{Et}_2\text{O}$ , 16:1) affording **5l** as a colorless oil (21 mg, 51%).  $^1\text{H}$  NMR (400 MHz,  $\text{CDCl}_3$ ):  $\delta = 7.41$ -7.32 (m, 5H), 5.35 (s, 1H), 4.88 (d,  $J = 11.6$  Hz, 1H), 4.67 (d,  $J = 11.8$  Hz, 1H), 2.71-2.56 (m, 2H), 1.64-1.56 (m, 2H), 1.32-1.21 (m, 12H), 0.88 (t,  $J = 6.7$  Hz, 3H);

$^{13}\text{C}$  NMR (100 MHz,  $\text{CDCl}_3$ ):  $\delta = 202.5$ , 135.5, 130.0 (q,  $J(\text{C},\text{F}) = 308.6$  Hz), 128.9, 128.7, 128.5, 86.8 (q,  $J(\text{C},\text{F}) = 1.2$  Hz), 70.7, 38.4, 32.0, 29.5, 29.5, 29.4, 29.1, 23.5, 22.8, 14.2;  $^{19}\text{F}$  NMR (377 MHz,  $\text{CDCl}_3$ ):  $\delta = -37.35$ ; HRMS (ESI):  $m/z$  calcd. for  $\text{C}_{19}\text{H}_{27}\text{O}_2\text{F}_3\text{S}+\text{Na}^+$ : 399.1582 [ $M+\text{Na}$ ] $^+$ ; found: 399.1587.

### 1-(hexyloxy)-1-((trifluoromethyl)thio)undecan-2-one (5m)

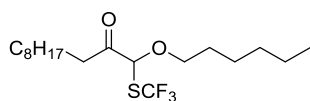

Title compound **5m** was prepared according to general procedure A and purified by column chromatography ( $\text{SiO}_2$ ; petroleum ether /  $\text{Et}_2\text{O}$ , 16:1) affording **5m** as a colorless oil (25 mg, 62%).

$^1\text{H}$  NMR (400 MHz,  $\text{CDCl}_3$ ):  $\delta = 5.32$  (s, 1H), 3.79 (dt,  $J = 9.2$  Hz, 6.6 Hz, 1H), 3.54 (dt,  $J = 9.2$  Hz, 6.6 Hz, 1H), 2.71-2.55 (m, 2H), 1.69-1.57 (m, 4H), 1.40-1.21 (m, 18H), 0.92-0.85 (m, 6H);  $^{13}\text{C}$  NMR (100 MHz,  $\text{CDCl}_3$ ):  $\delta = 202.9$ , 130.2 (q,  $J(\text{C},\text{F}) = 308.1$  Hz), 88.4 (q,  $J(\text{C},\text{F}) = 1.1$  Hz), 69.6, 38.2, 32.0, 31.6, 29.5, 29.5, 29.4, 29.2, 29.1, 25.8, 23.5, 22.8, 22.7, 14.2, 14.1;  $^{19}\text{F}$  NMR (377 MHz,  $\text{CDCl}_3$ ):  $\delta = -37.64$ ; HRMS (ESI):  $m/z$  calcd. for  $\text{C}_{18}\text{H}_{33}\text{O}_2\text{F}_3\text{S}+\text{Na}^+$ : 393.2051 [ $M+\text{Na}$ ] $^+$ ; found: 393.2057.

### 2-(benzyloxy)-2-((trifluoromethyl)thio)-2,3-dihydro-1H-inden-1-one (5n)

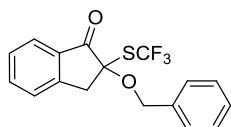

Title compound **5n** was prepared according to general procedure A and purified by column chromatography ( $\text{SiO}_2$ ; petroleum ether /  $\text{Et}_2\text{O}$ , 16:1) affording **5n** as a colorless oil (29 mg, 75%).  $^1\text{H}$  NMR (400 MHz,  $\text{CDCl}_3$ ):  $\delta = 7.86$ -7.82 (m, 1H), 7.71-7.66 (m, 1H), 7.48-7.41 (m, 2H), 7.34-7.26 (m, 5H), 5.03

(d,  $J = 11.3$  Hz, 1H), 4.84 (d,  $J = 11.3$  Hz, 1H), 3.88 (d,  $J = 17.4$  Hz, 1H), 3.67 (d,  $J = 17.4$  Hz, 1H);  $^{13}\text{C}$  NMR (100 MHz,  $\text{CDCl}_3$ ):  $\delta = 195.5$ , 149.6, 136.7, 136.7, 132.3, 130.1 (q,  $J(\text{C},\text{F}) = 309.8$  Hz), 128.7, 128.5, 128.2, 128.1, 126.5, 125.9, 93.9, 68.0, 43.6 (q,  $J(\text{C},\text{F}) = 1.6$  Hz);



$^{19}\text{F}$  NMR (377 MHz,  $\text{CDCl}_3$ ):  $\delta = -35.33$ ; HRMS (ESI):  $m/z$  calcd. for  $\text{C}_{17}\text{H}_{13}\text{O}_2\text{F}_3\text{S}+\text{Na}^+$ : 361.0486  $[M+\text{Na}]^+$ ; found: 361.0470.

**ethyl 2-(benzyloxy)-2-((trifluoromethyl)thio)acetate (5o)**

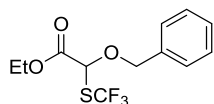

Title compound **5o** was prepared according to general procedure A and purified by column chromatography ( $\text{SiO}_2$ ; petroleum ether /  $\text{Et}_2\text{O}$ , 16:1) affording **5o** as a colorless oil (8.0 mg, 27%).  $^1\text{H}$  NMR (400 MHz,  $\text{CDCl}_3$ ):  $\delta = 7.39\text{--}7.32$  (m, 5H), 5.49 (s, 1H), 4.85 (d,  $J = 11.6$  Hz, 1H), 4.74 (d,  $J = 11.6$  Hz, 1H), 4.28 (qd,  $J = 7.1$  Hz, 1.5 Hz, 2H), 1.31 (t,  $J = 7.1$  Hz, 3H);  $^{13}\text{C}$  NMR (100 MHz,  $\text{CDCl}_3$ ):  $\delta = 166.5$ , 135.5, 129.9 (q,  $J(\text{C},\text{F}) = 308.5$  Hz), 128.8, 128.7, 128.6, 80.9 (q,  $J(\text{C},\text{F}) = 2.0$  Hz), 70.5, 62.8, 14.1;  $^{19}\text{F}$  NMR (377 MHz,  $\text{CDCl}_3$ ):  $\delta = -38.32$ ; HRMS (ESI):  $m/z$  calcd. for  $\text{C}_{12}\text{H}_{13}\text{O}_3\text{F}_3\text{S}+\text{Na}^+$ : 317.0435  $[M+\text{Na}]^+$ ; found: 317.0429.

**methyl 2-(benzyloxy)-2-phenyl-2-((trifluoromethyl)thio)acetate (5p)**

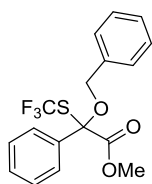

Title compound **5p** was prepared according to general procedure A and purified by column chromatography ( $\text{SiO}_2$ ; petroleum ether /  $\text{Et}_2\text{O}$ , 16:1) affording **5p** as a white solid (8.0 mg, 20%).  $^1\text{H}$  NMR (400 MHz,  $\text{CDCl}_3$ ):  $\delta = 7.72\text{--}7.68$  (m, 2H), 7.48–7.44 (m, 2H), 7.43–7.33 (m, 6H), 5.05 (d,  $J = 10.7$  Hz, 1H), 4.56 (d,  $J = 10.7$  Hz, 1H), 3.75 (s, 3H);  $^{13}\text{C}$  NMR (100 MHz,  $\text{CDCl}_3$ ):  $\delta = 168.9$  (q,  $J(\text{C},\text{F}) = 1.8$  Hz), 138.0, 136.4, 129.4 (q,  $J(\text{C},\text{F}) = 309.4$  Hz), 129.3, 128.6, 128.6, 128.2, 128.2, 126.4, 97.0 (q,  $J(\text{C},\text{F}) = 1.4$  Hz), 68.8, 53.9;  $^{19}\text{F}$  NMR (377 MHz,  $\text{CDCl}_3$ ):  $\delta = -37.47$ ; HRMS (ESI):  $m/z$  calcd. for  $\text{C}_{17}\text{H}_{15}\text{O}_3\text{F}_3\text{S}+\text{Na}^+$ : 379.0592  $[M+\text{Na}]^+$ ; found: 379.0600; Mp: 78.5–79.5 °C.

**2-methoxy-1-phenyl-2-((trifluoromethyl)thio)ethan-1-one (5q)**

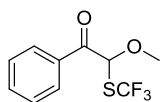

Title compound **5q** was prepared according to general procedure B from dimethoxymethane and trimethyl orthoformate and purified by column chromatography ( $\text{SiO}_2$ ; petroleum ether /  $\text{Et}_2\text{O}$ , 16:1) affording **5q** as a colorless oil (11 mg, 41% from dimethoxymethane; 15 mg, 55% from trimethyl orthoformate).  $^1\text{H}$  NMR (400 MHz,  $\text{CDCl}_3$ ):  $\delta = 8.08\text{--}8.03$  (m, 2H), 7.68–7.62 (m, 1H), 7.55–7.48 (m, 2H), 6.47 (s, 1H), 3.48 (s, 3H);  $^{13}\text{C}$  NMR (100 MHz,  $\text{CDCl}_3$ ):  $\delta = 191.4$ , 134.8, 133.0, 130.3 (q,  $J(\text{C},\text{F}) = 308.0$  Hz), 129.6, 129.1, 88.8 (q,  $J(\text{C},\text{F}) = 1.6$  Hz), 54.6;  $^{19}\text{F}$  NMR (377 MHz,  $\text{CDCl}_3$ ):  $\delta = -38.70$ ; HRMS (ESI):  $m/z$  calcd. for  $\text{C}_{10}\text{H}_9\text{O}_2\text{F}_3\text{S}+\text{Na}^+$ : 273.0168  $[M+\text{Na}]^+$ ; found: 273.0175.

**1-(4-bromophenyl)-2-methoxy-2-((trifluoromethyl)thio)ethan-1-one (5r)**

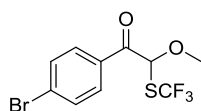

Title compound **5r** was prepared according to general procedure B and purified by column chromatography (SiO<sub>2</sub>; petroleum ether / Et<sub>2</sub>O, 16:1) affording **5r** as a colorless oil (12 mg, 34%). <sup>1</sup>H NMR (400 MHz, CDCl<sub>3</sub>): δ = 7.95-7.90 (m, 2H), 7.69-7.63 (m, 2H), 6.36 (s, 1H), 3.48 (s, 3H); <sup>13</sup>C NMR (100 MHz, CDCl<sub>3</sub>): δ = 190.5, 132.5, 131.7, 131.0, 130.3, 130.2 (q, *J*(C,F) = 308.1 Hz), 88.8 (q, *J*(C,F) = 1.5 Hz), 54.8; <sup>19</sup>F NMR (377 MHz, CDCl<sub>3</sub>): δ = -38.65; HRMS (ESI): *m/z* calcd. for C<sub>10</sub>H<sub>8</sub>O<sub>2</sub>F<sub>3</sub>S<sup>79</sup>Br+Na<sup>+</sup>: 350.9278 [*M*+Na]<sup>+</sup>; found: 350.9279.

## 2-(2-(2-methoxyethoxy)ethoxy)-1-phenyl-2-((trifluoromethyl)thio)ethan-1-one (5s)

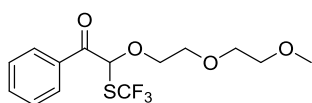

Title compound **5s** was prepared according to general procedure B and purified by column chromatography (SiO<sub>2</sub>; petroleum ether / CH<sub>2</sub>Cl<sub>2</sub>, 1:1) affording **5s** as a colorless oil (24 mg, 72%). <sup>1</sup>H NMR (400 MHz, CDCl<sub>3</sub>): δ = 8.10-8.04 (m, 2H), 7.66-7.60 (m, 1H), 7.53-7.46 (m, 2H), 6.61 (s, 1H), 4.00-3.92 (m, 1H), 3.79-3.72 (m, 1H), 3.68-3.64 (m, 2H), 3.58-3.48 (m, 2H), 3.44-3.40 (m, 2H); <sup>13</sup>C NMR (100 MHz, CDCl<sub>3</sub>): δ = 191.3, 134.6, 133.2, 130.3 (q, *J*(C,F) = 308.2 Hz), 129.6, 129.0, 87.4 (q, *J*(C,F) = 1.5 Hz), 71.9, 70.6, 70.1, 66.9, 59.1; <sup>19</sup>F NMR (377 MHz, CDCl<sub>3</sub>): δ = -38.55; HRMS (ESI): *m/z* calcd. for C<sub>14</sub>H<sub>17</sub>O<sub>4</sub>F<sub>3</sub>S+Na<sup>+</sup>: 361.0692 [*M*+Na]<sup>+</sup>; found: 361.0702.

## *N*-(4-(2-oxo-2-phenyl-1-((trifluoromethyl)thio)ethoxy)butyl)-*N*-(phenylsulfonyl)benzenesulfonamide (8a)

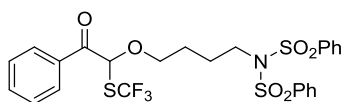

Title compound **8a** was prepared according to general procedure C and purified by column chromatography (SiO<sub>2</sub>; petroleum ether / Et<sub>2</sub>O, 3:1) affording **8a** as a colorless oil (40 mg, 66%). <sup>1</sup>H NMR (400 MHz, CDCl<sub>3</sub>): δ = 8.08-8.03 (m, 2H), 8.02-7.96 (m, 4H), 7.68-7.61 (m, 3H), 7.56-7.48 (m, 6H), 6.52 (s, 1H), 3.71 (dt, *J* = 9.0 Hz, 6.1 Hz, 1H), 3.69-3.63 (m, 2H), 3.42 (dt, *J* = 9.0 Hz, 6.1 Hz, 1H), 1.77-1.67 (m, 2H), 1.58-1.48 (m, 2H); <sup>13</sup>C NMR (100 MHz, CDCl<sub>3</sub>): δ = 191.4, 139.9, 134.9, 134.0, 132.8, 130.4 (q, *J*(C,F) = 308.0 Hz), 129.5, 129.2, 129.1, 128.2, 87.9 (q, *J*(C,F) = 1.3 Hz), 66.3, 49.1, 26.6, 26.2; <sup>19</sup>F NMR (377 MHz, CDCl<sub>3</sub>): δ = -38.54; HRMS (ESI): *m/z* calcd. for C<sub>25</sub>H<sub>24</sub>O<sub>6</sub>F<sub>3</sub>S<sub>3</sub>+Na<sup>+</sup>: 610.0610 [*M*+Na]<sup>+</sup>; found: 610.0619.

## *N*-(4-(4-(2-oxo-2-phenyl-1-((trifluoromethyl)thio)ethoxy)butoxy)butyl)-*N*-(phenylsulfonyl)benzenesulfonamide (8b)

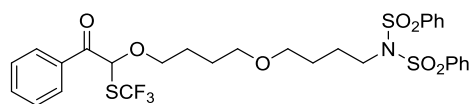

Title compound **8b** was prepared according to general procedure C using 60 equiv. of THF (**7a**) and purified by column chromatography (SiO<sub>2</sub>; petroleum ether / Et<sub>2</sub>O, 3:1) affording **8b** as a colorless oil (27 mg, 42%). <sup>1</sup>H NMR (400 MHz, CDCl<sub>3</sub>): δ = 8.12-8.02 (m, 6H), 7.71-7.63 (m, 3H), 7.61-7.48 (m, 6H), 6.56 (s, 1H), 3.81 (dt, *J* = 9.0 Hz, 6.1 Hz, 1H), 3.76-3.69 (m, 2H), 3.52 (dt, *J* = 9.0 Hz, 6.1 Hz, 1H), 3.36-3.29 (m, 4H), 1.81-1.71 (m, 2H), 1.70-1.46 (m, 6H); <sup>13</sup>C NMR (100 MHz, CDCl<sub>3</sub>): δ = 191.6, 140.0, 134.8, 133.9, 132.9, 130.4 (q, *J*(C,F) = 307.9 Hz), 129.5, 129.2, 129.1, 128.2, 88.0 (q, *J*(C,F) = 1.6 Hz), 70.3, 70.1, 67.0, 49.5, 27.1, 26.8, 26.2, 26.1; <sup>19</sup>F NMR (377 MHz, CDCl<sub>3</sub>): δ = -38.55; HRMS (ESI): *m/z* calcd. for C<sub>29</sub>H<sub>32</sub>O<sub>7</sub>F<sub>3</sub>S<sub>3</sub>+Na<sup>+</sup>: 682.1185 [*M*+Na]<sup>+</sup>; found: 682.1187.

***N*-(4-((2-oxo-1-((trifluoromethyl)thio)undecyl)oxy)butyl)-*N*-(phenylsulfonyl)benzenesulfonamide (8c)**

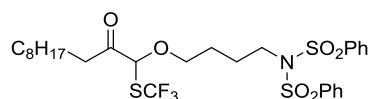

Title compound **8c** was prepared according to general procedure C and purified by column chromatography (SiO<sub>2</sub>; petroleum ether / Et<sub>2</sub>O, 3:1) affording **8c** as a colorless oil (34 mg, 50%). <sup>1</sup>H NMR (400 MHz, CDCl<sub>3</sub>): δ = 8.05-8.00 (m, 4H), 7.69-7.64 (m, 2H), 7.59-7.53 (m, 4H), 5.31 (s, 1H), 3.78-3.70 (m, 3H), 3.50 (dt, *J* = 9.2 Hz, 6.1 Hz, 1H), 2.69-2.52 (m, 2H), 1.85-1.77 (m, 2H), 1.66-1.56 (m, 4H), 1.33-1.21 (m, 12H), 0.87 (t, *J* = 6.8 Hz, 3H); <sup>13</sup>C NMR (100 MHz, CDCl<sub>3</sub>): δ = 202.3, 140.0, 134.1, 130.1 (q, *J*(C,F) = 308.3 Hz), 129.3, 128.3, 88.1 (q, *J*(C,F) = 1.1 Hz), 68.6, 49.1, 38.3, 32.0, 29.5, 29.5, 29.4, 29.2, 26.7, 26.2, 23.4, 22.8, 14.2; <sup>19</sup>F NMR (377 MHz, CDCl<sub>3</sub>): δ = -37.61; HRMS (ESI): *m/z* calcd. for C<sub>28</sub>H<sub>38</sub>O<sub>6</sub>F<sub>3</sub>S<sub>3</sub>+Na<sup>+</sup>: 660.1711 [*M*+Na]<sup>+</sup>; found: 660.1724.

**ethyl 2-(4-(*N*-(phenylsulfonyl)phenylsulfonamido)butoxy)-2-((trifluoromethyl)thio)acetate (8d)**

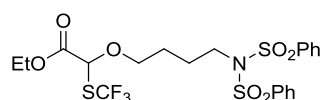

Title compound **8d** was prepared according to general procedure C and purified by column chromatography (SiO<sub>2</sub>; petroleum ether / Et<sub>2</sub>O, 3:1) affording **8d** as a colorless oil (21 mg, 38%). <sup>1</sup>H NMR (400 MHz, CDCl<sub>3</sub>): δ = 8.06-8.01 (m, 4H), 7.68-7.63 (m, 2H), 7.59-7.53 (m, 4H), 5.46 (s, 1H), 4.29 (q, *J* = 7.6 Hz, 2H), 3.78-3.68 (m, 3H), 3.58 (dt, *J* = 9.1 Hz, 6.1 Hz, 1H), 1.87-1.76 (m, 2H), 1.67-1.57 (m, 2H), 1.31 (t, *J* = 7.1 Hz, 3H); <sup>13</sup>C NMR (100 MHz, CDCl<sub>3</sub>): δ = 166.4, 140.1, 134.0, 129.9 (q, *J*(C,F) = 308.2 Hz), 129.2, 128.3, 82.2 (q, *J*(C,F) = 2.0 Hz), 68.4, 62.8, 49.2, 26.7, 26.2, 14.1; <sup>19</sup>F NMR (377 MHz, CDCl<sub>3</sub>): δ = -38.57; HRMS (ESI): *m/z* calcd. for

C<sub>21</sub>H<sub>24</sub>NO<sub>7</sub>F<sub>3</sub>S+Na<sup>+</sup>: 578.0565 [*M*+Na]<sup>+</sup>; found: 578.0575.

***N*-(2-((2-oxo-2-phenyl-1-((trifluoromethyl)thio)ethoxy)methyl)benzyl)-*N*-(phenylsulfonyl)benzenesulfonamide (8e)**

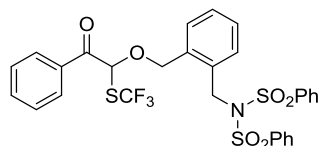

Title compound **8e** was prepared according to general procedure C using 60 equiv. of phthalane (**7b**) in 0.5 mL dry CH<sub>2</sub>Cl<sub>2</sub>. The title compound **8e** was purified by column chromatography (SiO<sub>2</sub>; petroleum ether / Et<sub>2</sub>O, 3:1) affording **8e** as a colorless oil (38 mg, 58%). <sup>1</sup>H NMR (400 MHz, CDCl<sub>3</sub>): δ = 7.98-7.93 (m, 2H), 7.75-7.69 (m, 4H), 7.61-7.54 (m, 3H), 7.45-7.38 (m, 6H), 7.29-7.25 (m, 1H), 7.20-7.15 (m, 2H), 7.09-7.03 (m, 1H), 6.53 (s, 1H), 4.93 (d, *J* = 11.3 Hz, 1H), 4.92 (d, *J* = 16.4 Hz, 1H), 4.82 (d, *J* = 16.4 Hz, 1H), 4.75 (d, *J* = 11.3 Hz, 1H); <sup>13</sup>C NMR (100 MHz, CDCl<sub>3</sub>): δ = 191.1, 139.9, 134.7, 134.1, 133.8, 133.6, 133.0, 130.2 (q, *J*(C,F) = 308.4 Hz), 130.2, 129.6, 129.4, 129.1, 129.0, 128.9, 128.2, 128.0, 86.5 (q, *J*(C,F) = 1.5 Hz), 67.5, 48.8; <sup>19</sup>F NMR (377 MHz, CDCl<sub>3</sub>): δ = -38.34; HRMS (ESI): *m/z* calcd. for C<sub>29</sub>H<sub>24</sub>NO<sub>6</sub>F<sub>3</sub>S<sub>3</sub>+Na<sup>+</sup>: 658.0616 [*M*+Na]<sup>+</sup>; found: 658.0621.

***N*-(2-(2-(2-oxo-2-phenyl-1-((trifluoromethyl)thio)ethoxy)ethoxy)ethyl)-*N*-(phenylsulfonyl)benzenesulfonamide (8f)**

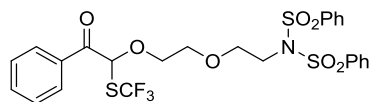

Title compound **8f** was prepared according to general procedure B and purified by column chromatography (SiO<sub>2</sub>; petroleum ether / Et<sub>2</sub>O, 3:1) affording **8f** as a colorless oil (31 mg, 52%). <sup>1</sup>H NMR (400 MHz, CDCl<sub>3</sub>): δ = 8.08-8.04 (m, 2H), 8.04-8.00 (m, 4H), 7.67-7.60 (m, 3H), 7.56-7.47 (m, 6H), 6.62 (s, 1H), 3.88-3.72 (m, 3H), 3.64-3.54 (m, 3H), 3.52-3.47 (m, 2H); <sup>13</sup>C NMR (100 MHz, CDCl<sub>3</sub>): δ = 191.3, 139.7, 134.8, 134.0, 132.9, 130.3 (q, *J*(C,F) = 308.1 Hz), 129.6, 129.1, 129.1, 128.4, 87.6 (q, *J*(C,F) = 1.6 Hz), 69.8, 69.7, 66.3, 47.8; <sup>19</sup>F NMR (377 MHz, CDCl<sub>3</sub>): δ = -38.53; HRMS (ESI): *m/z* calcd. for C<sub>25</sub>H<sub>24</sub>NO<sub>7</sub>F<sub>3</sub>S<sub>3</sub>+Na<sup>+</sup>: 626.0559 [*M*+Na]<sup>+</sup>; found: 626.0572.

***N*-(phenylsulfonyl)-*N*-(2-((trifluoromethyl)thio)cyclohexyl)benzenesulfonamide (13)**

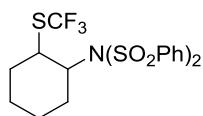

Title compound **13** was prepared by the following procedure: In a 2 mL pressurizable reaction tube were measured (PhSO<sub>2</sub>)<sub>2</sub>NSCF<sub>3</sub> (**1**) (40 mg, 0.1 mmol, 1.0 equiv.) and Rh<sub>2</sub>(OAc)<sub>4</sub> (**4**) (0.5 mg, 0.001 mmol, 0.01 equiv.) under ambient conditions. In a dry argon filled glovebox was added a solution of diazo compound **2** (0.12 mmol, 1.2 equiv.) and cyclohexene oxide (**9**) (1.0 mmol, 10 equiv.) in 0.5

mL dry  $\text{CH}_2\text{Cl}_2$  to the reaction vial. The mixture in the closed reaction vial was stirred for 24 h before being transferred directly on a chromatography column and purified on silica gel ( $\text{SiO}_2$ ; petroleum ether /  $\text{Et}_2\text{O}$ , 3:1) affording **13** as a yellowish solid (12 mg, 24%).  $^1\text{H}$  NMR (400 MHz,  $\text{CDCl}_3$ ):  $\delta$  = 8.26-7.82 (m, broad, 4H), 7.71-7.64 (m, 2H), 7.61-7.53 (m, 4H), 4.24 (td,  $J$  = 11.5 Hz, 4.1 Hz, 1H), 3.76 (td,  $J$  = 11.8 Hz, 3.7 Hz, 1H), 2.47-2.39 (m, 1H), 4.93 (qd,  $J$  = 12.5 Hz, 3.5 Hz 1H), 1.79-1.68 (m, 2H), 1.68-1.60 (m, 1H), 1.60-1.48 (m, 1H), 1.39-1.10 (m, 2H);  $^{13}\text{C}$  NMR (100 MHz,  $\text{CDCl}_3$ ):  $\delta$  = 144.3 (broad), 141.5 (broad), 138.4 (broad), 134.0 (broad), 130.9 (q,  $J(\text{C},\text{F})$  = 307.1 Hz), 129.1 (broad), 65.7 (q,  $J(\text{C},\text{F})$  = 1.0 Hz), 41.7 (q,  $J(\text{C},\text{F})$  = 1.7 Hz), 37.0 (q,  $J(\text{C},\text{F})$  = 0.9 Hz), 32.8, 26.4, 25.5;  $^{19}\text{F}$  NMR (377 MHz,  $\text{CDCl}_3$ ):  $\delta$  = -37.81; HRMS (ESI):  $m/z$  calcd. for  $\text{C}_{19}\text{H}_{20}\text{NO}_4\text{F}_3\text{S}_3+\text{Na}^+$ : 502.0399  $[M+\text{Na}]^+$ ; found: 502.0403, Mp: 156-157 °C.

### Attempted cleavage of epoxides

When epoxide **9** was reacted with diazoketone **2a** and **1** in the presence of Rh-catalyst we did not observe formation of the expected oxy-trifluoromethylthiolation product **10** (Figure S1a). Instead we isolated amino-trifluoromethylthiol derivative **13**. A possible explanation is a Rh-catalyzed deoxygenation<sup>5</sup> of **9** by diazoketone **2a** to give **11** and cyclohexene **12** (Figure S1b). Subsequently, cyclohexene **12** reacted with **1** to give **13**.<sup>4</sup>

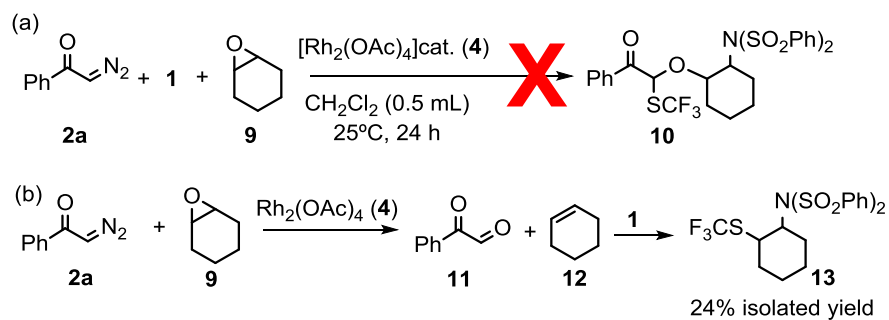

**Figure S1:** Attempted oxy-trifluoromethylthiolation with epoxide **9**.

### Mechanistical aspects: competitive fluorination vs. trifluoromethylthiolation and proposed catalytic cycle

When a reaction was carried out in the absence of alcohol **3**, amino-trifluoromethylthiolation product **14** did not form (Figure S2a). This clearly shows that the  $\text{N}(\text{SO}_2\text{Ph})_2$  group cannot serve as nucleophile in place of the alkoxy groups. This control reaction shows a clear difference between the reactivity of NFSI and **1**. Using NFSI in place of **1** allows aminofluorination of diazocarbonyl compounds to be performed under similar conditions.<sup>6,7</sup> We also have performed a competitive experiment between **1** and NFSI (Figure S2b). This experiment shows that under exactly the same reaction conditions oxy-trifluoromethylthiolation and –fluorination of diazoketones can be performed giving the analogous products **5a** and **15** in a ratio of 1:2.4. This suggests that the mechanisms of the two reactions are very similar and that the fluorine atom transfer is faster than transfer of the  $\text{SCF}_3$  group from the same dibenzenesulfonimide carrier.

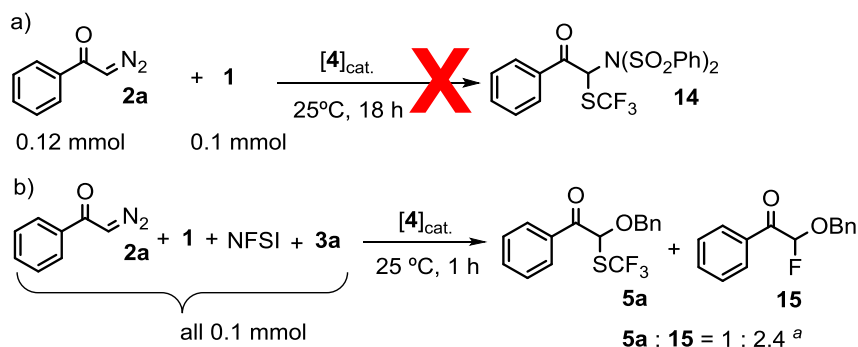

**Figure S2:** Control experiment without alcohol **3**, competitive fluorination/trifluoromethylthiolation under limiting conditions. <sup>a</sup> Determined by <sup>1</sup>H-NMR-spectroscopy.

A plausible catalytic cycle for the Rh-catalyzed oxy-trifluoromethylthiolation is given in Figure S3. The reactions with both dibenzenesulfonimide reagents (**1** and NFSI) or fluoro/trifluoromethyl-benziodoxols start with formation of Rh-carbenoid<sup>8</sup> **16** from **2a** and the catalyst **4**, which subsequently reacts with an alcohol, such as **3a** to give onium ylide **17**.<sup>9-14</sup> The subsequent step is trapping onium ylide **17** by the  $\text{SCF}_3$  electrophile. Although the trapping of onium ylids with electrophiles is a well studied and documented process,<sup>14</sup> using F,<sup>15</sup>  $\text{CF}_3$ <sup>15</sup> and  $\text{SCF}_3$  (the above study) as electrophiles is a very new direction for this process. A possible oxidative addition of **1** with ylide **17** may result in **18**, which undergoes reductive elimination to give product **5a** and the regenerated catalyst **4**. In the case of using ethers **6-7** instead of alcohols **3** as substrates a similar mechanism can be suggested. It is well known<sup>14</sup> that ethers are also able to form onium ylids (such as **17**), which can be trapped by electrophiles. The main difference is that in the onium ylide formed from ethers has an oxygen atom with *two* alkyl groups (instead of an alkyl group and a proton, as in **17**).

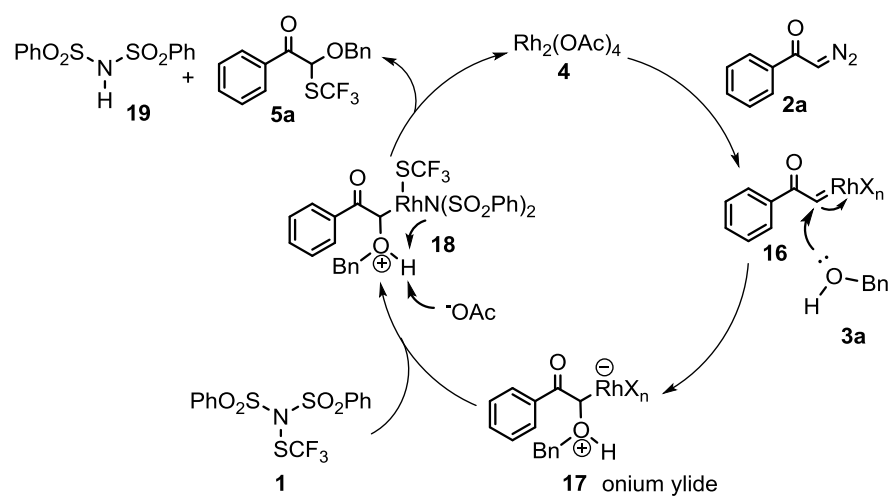

**Figure S3:** Plausible mechanism for the rhodium-catalyzed trifluoromethylthiolation reaction of diazo compounds together with alcohols.



$^1\text{H}$  NMR ( $\text{CDCl}_3$ , 400 MHz). 2-(Benzyloxy)-1-phenyl-2-((trifluoromethyl)thio)ethan-1-one (5a)

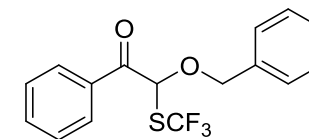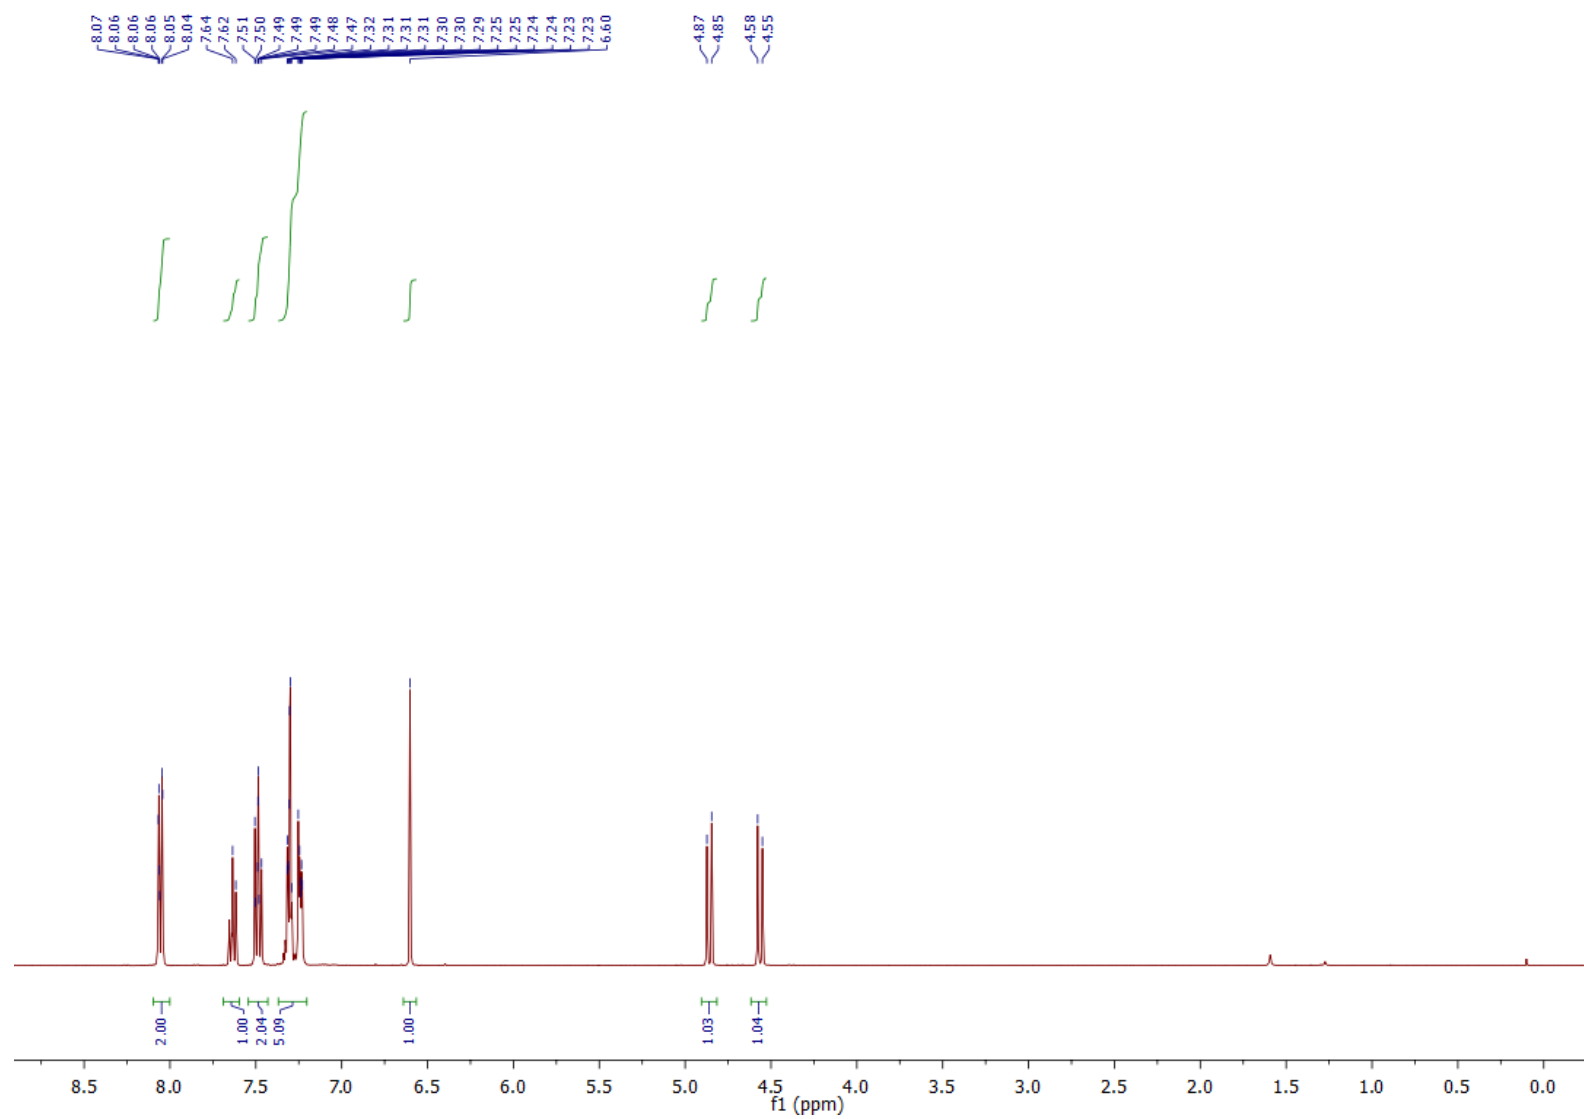

$^{13}\text{C}$  NMR ( $\text{CDCl}_3$ , 100 MHz). 2-(Benzyloxy)-1-phenyl-2-((trifluoromethyl)thio)ethan-1-one (**5a**)

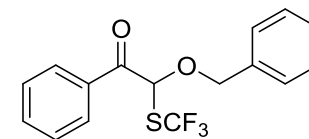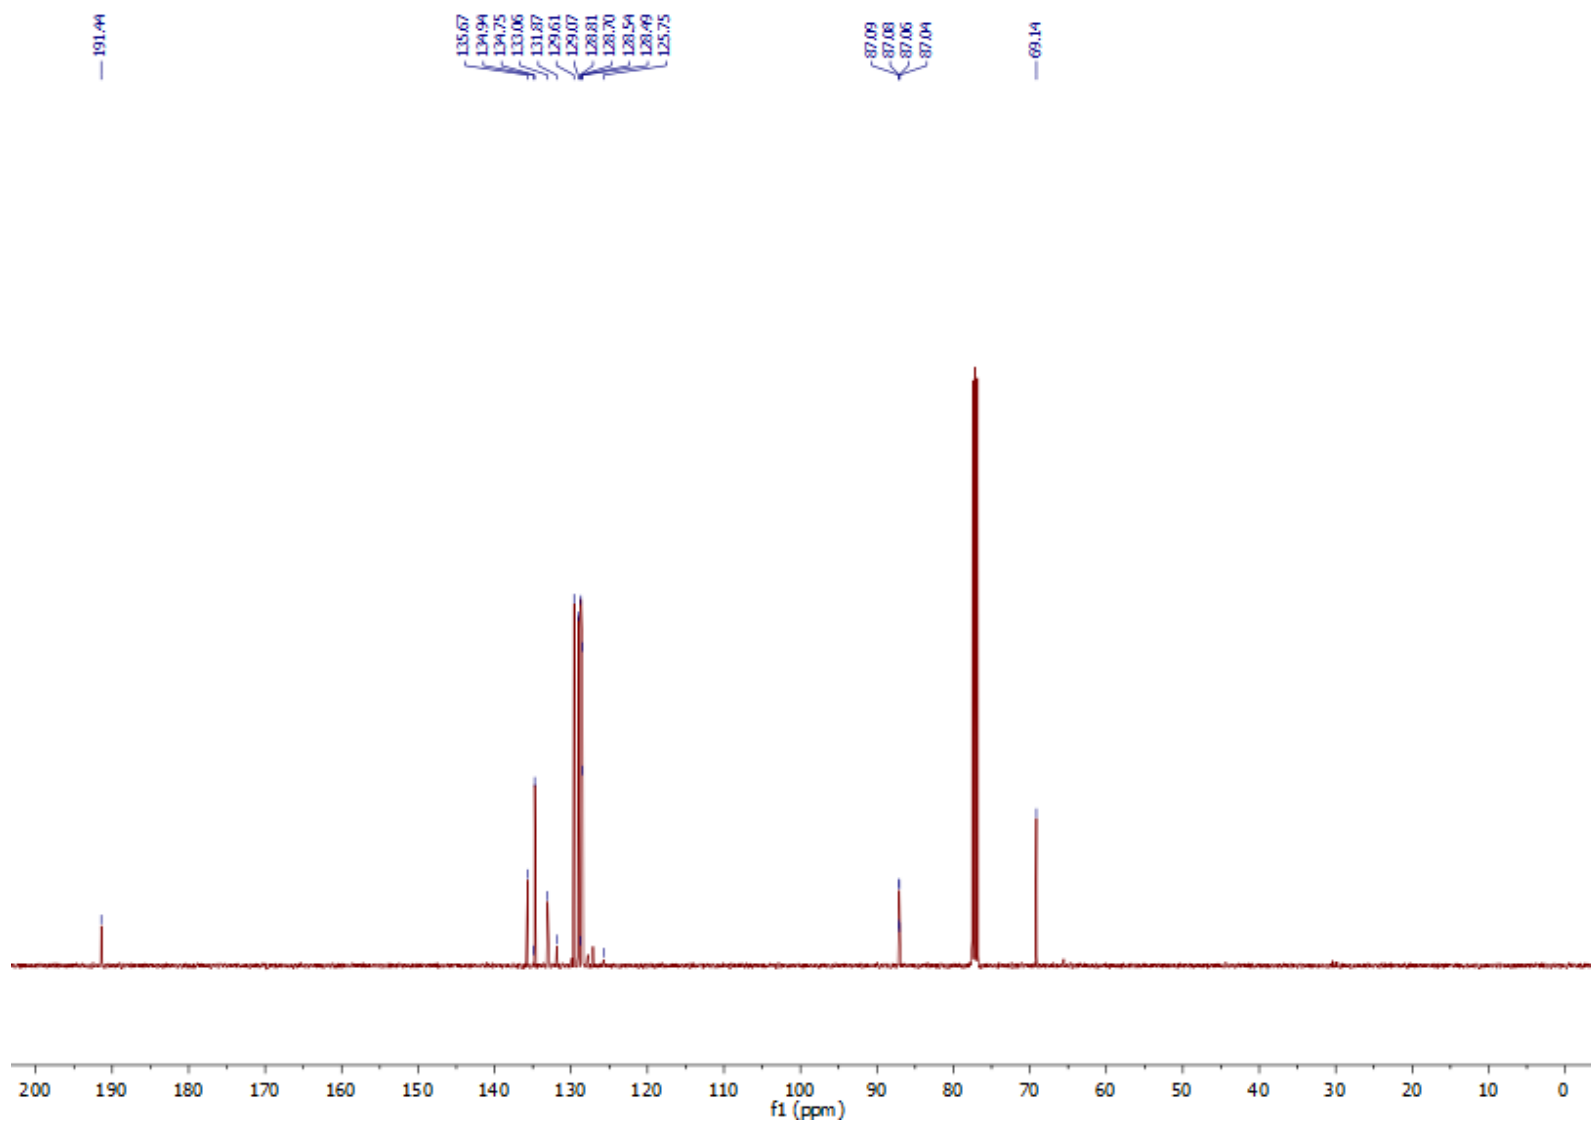

$^{19}\text{F}$  NMR ( $\text{CDCl}_3$ , 377 MHz). 2-(Benzyloxy)-1-phenyl-2-((trifluoromethyl)thio)ethan-1-one (**5a**)

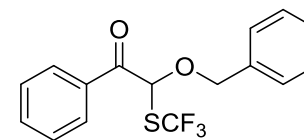

-38.47

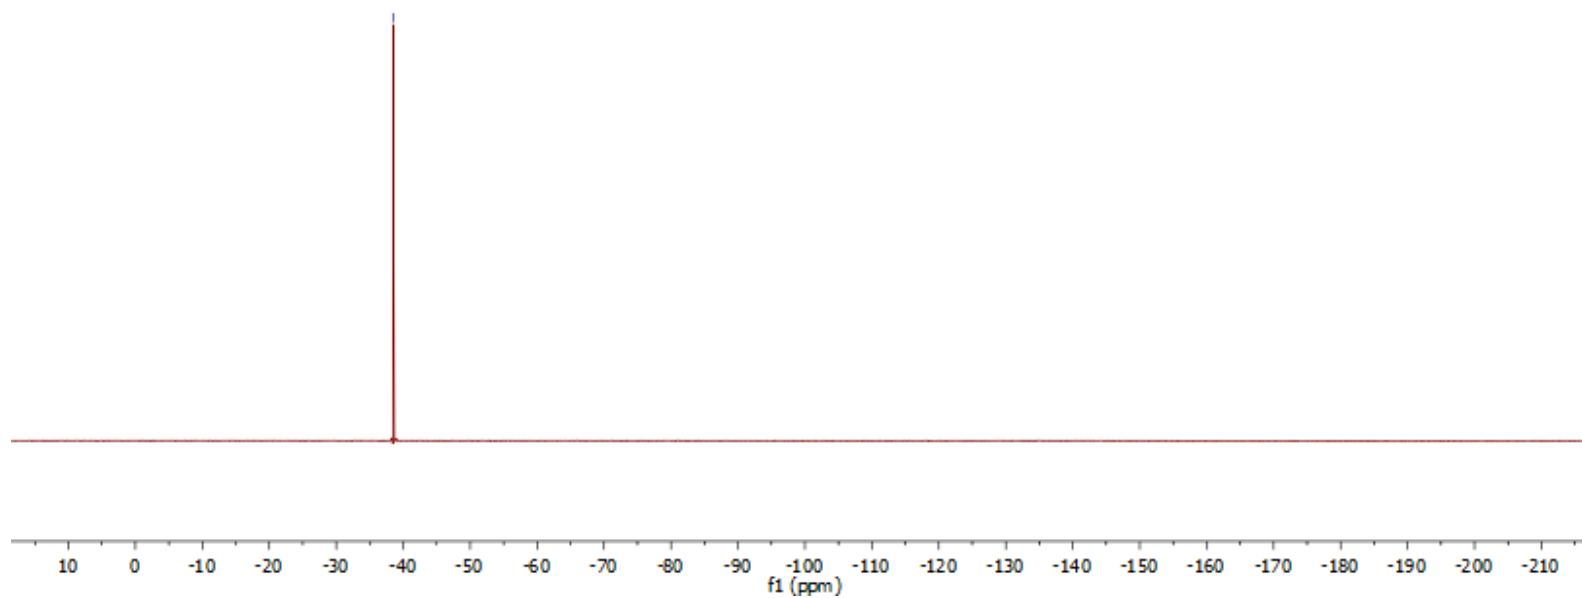

<sup>1</sup>H NMR (CDCl<sub>3</sub>, 400 MHz). 2-(Naphthalen-2-ylmethoxy)-1-phenyl-2-((trifluoromethyl)thio)ethan-1-one (**5b**)

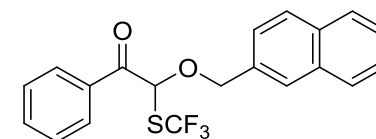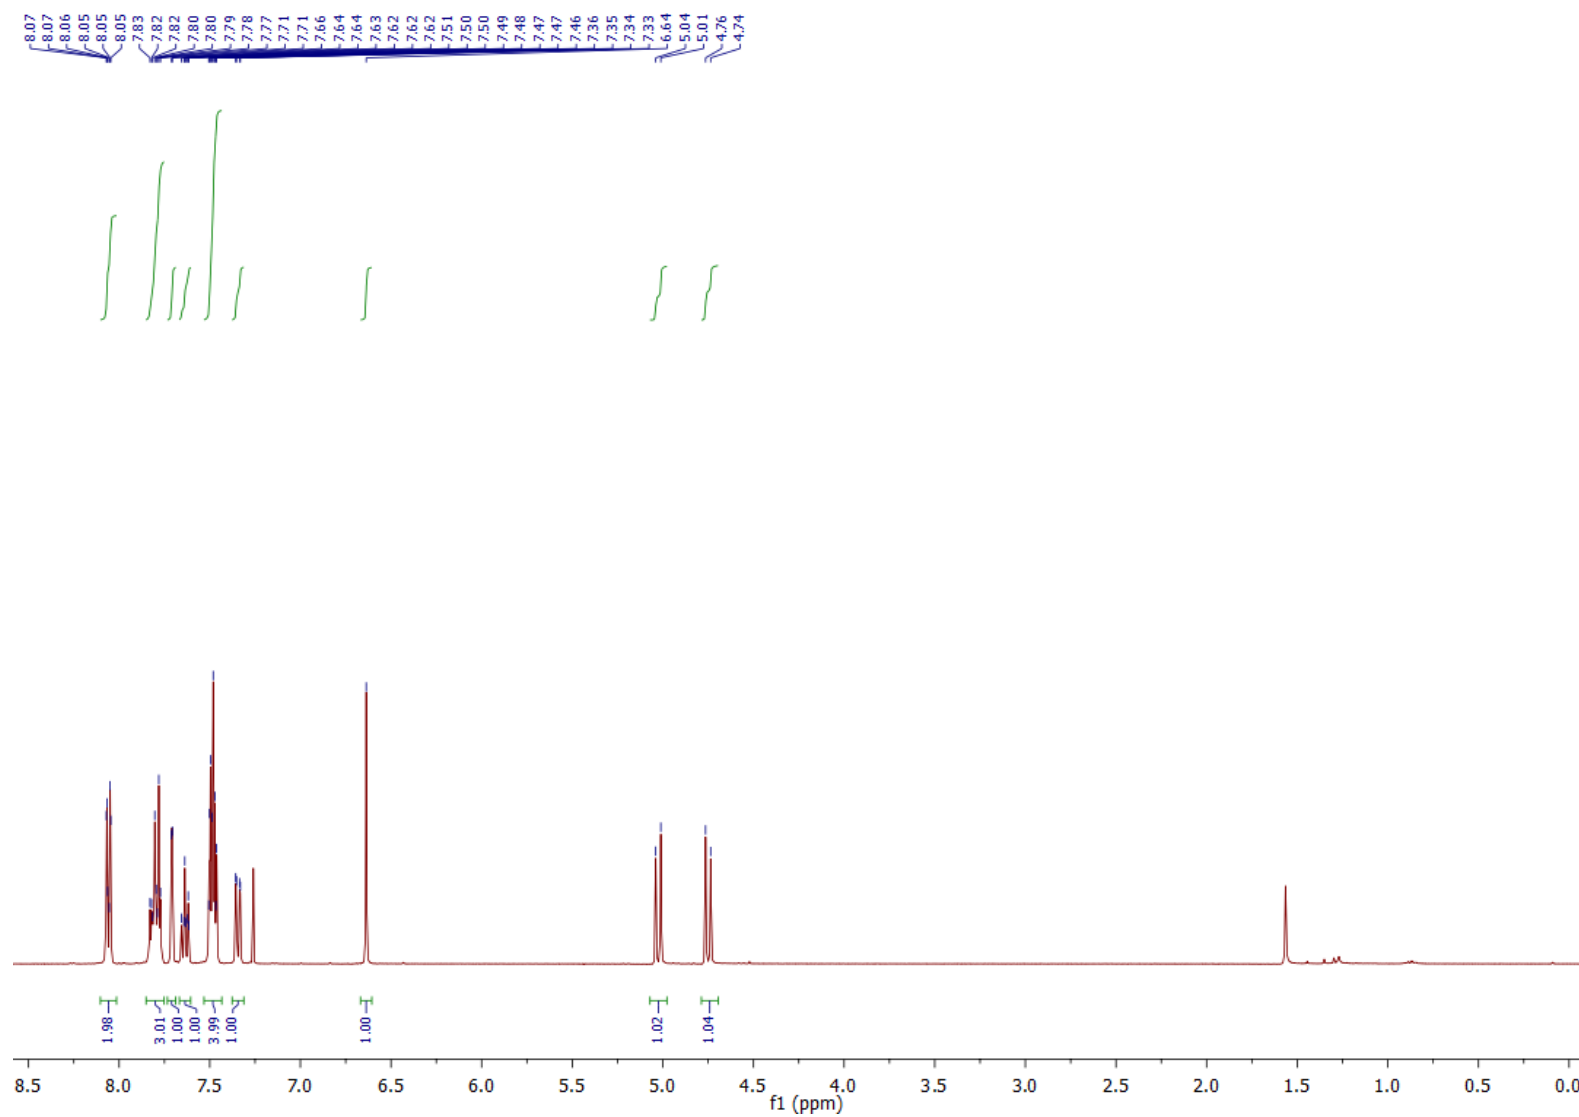

$^{13}\text{C}$  NMR ( $\text{CDCl}_3$ , 100 MHz). 2-(Naphthalen-2-ylmethoxy)-1-phenyl-2-((trifluoromethyl)thio)ethan-1-one (**5b**)

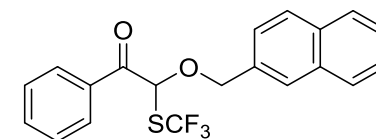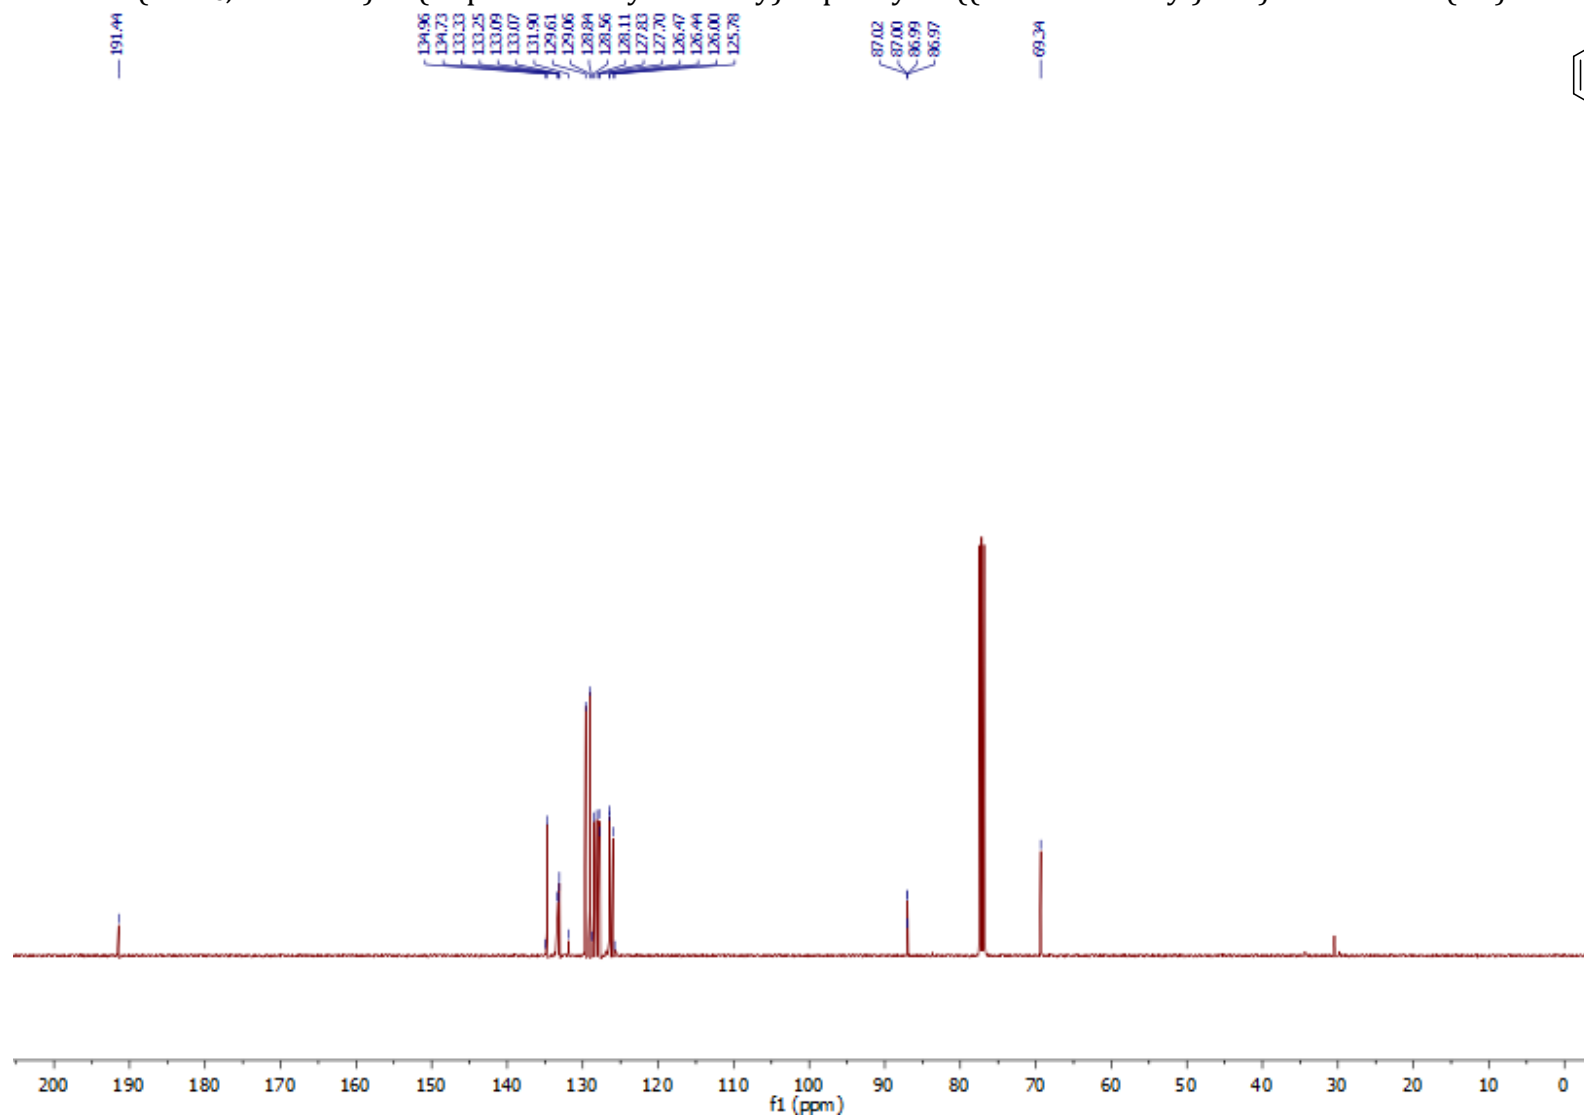

$^{19}\text{F}$  NMR ( $\text{CDCl}_3$ , 377 MHz). 2-(Naphthalen-2-ylmethoxy)-1-phenyl-2-((trifluoromethyl)thio)ethan-1-one (**5b**)

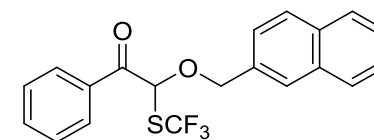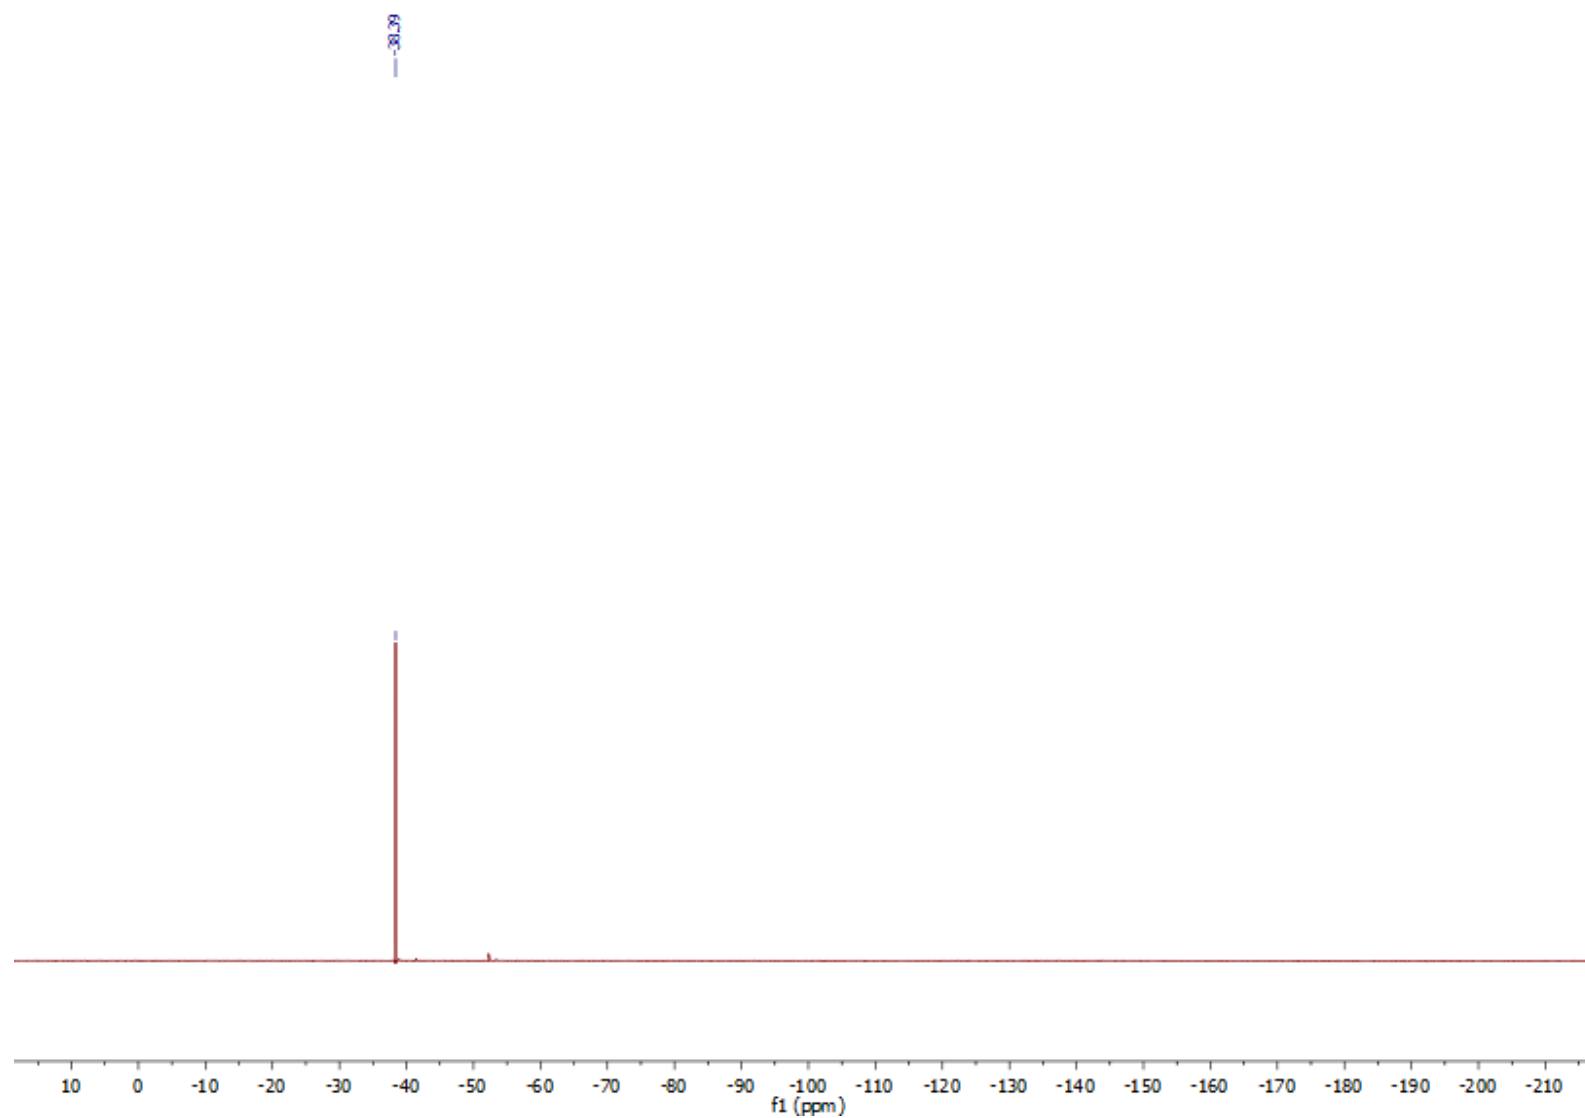

<sup>1</sup>H NMR (CDCl<sub>3</sub>, 400 MHz). 2-((2-Bromobenzyl)oxy)-1-phenyl-2-((trifluoromethyl)thio)ethan-1-one (**5c**)

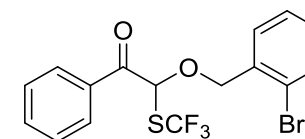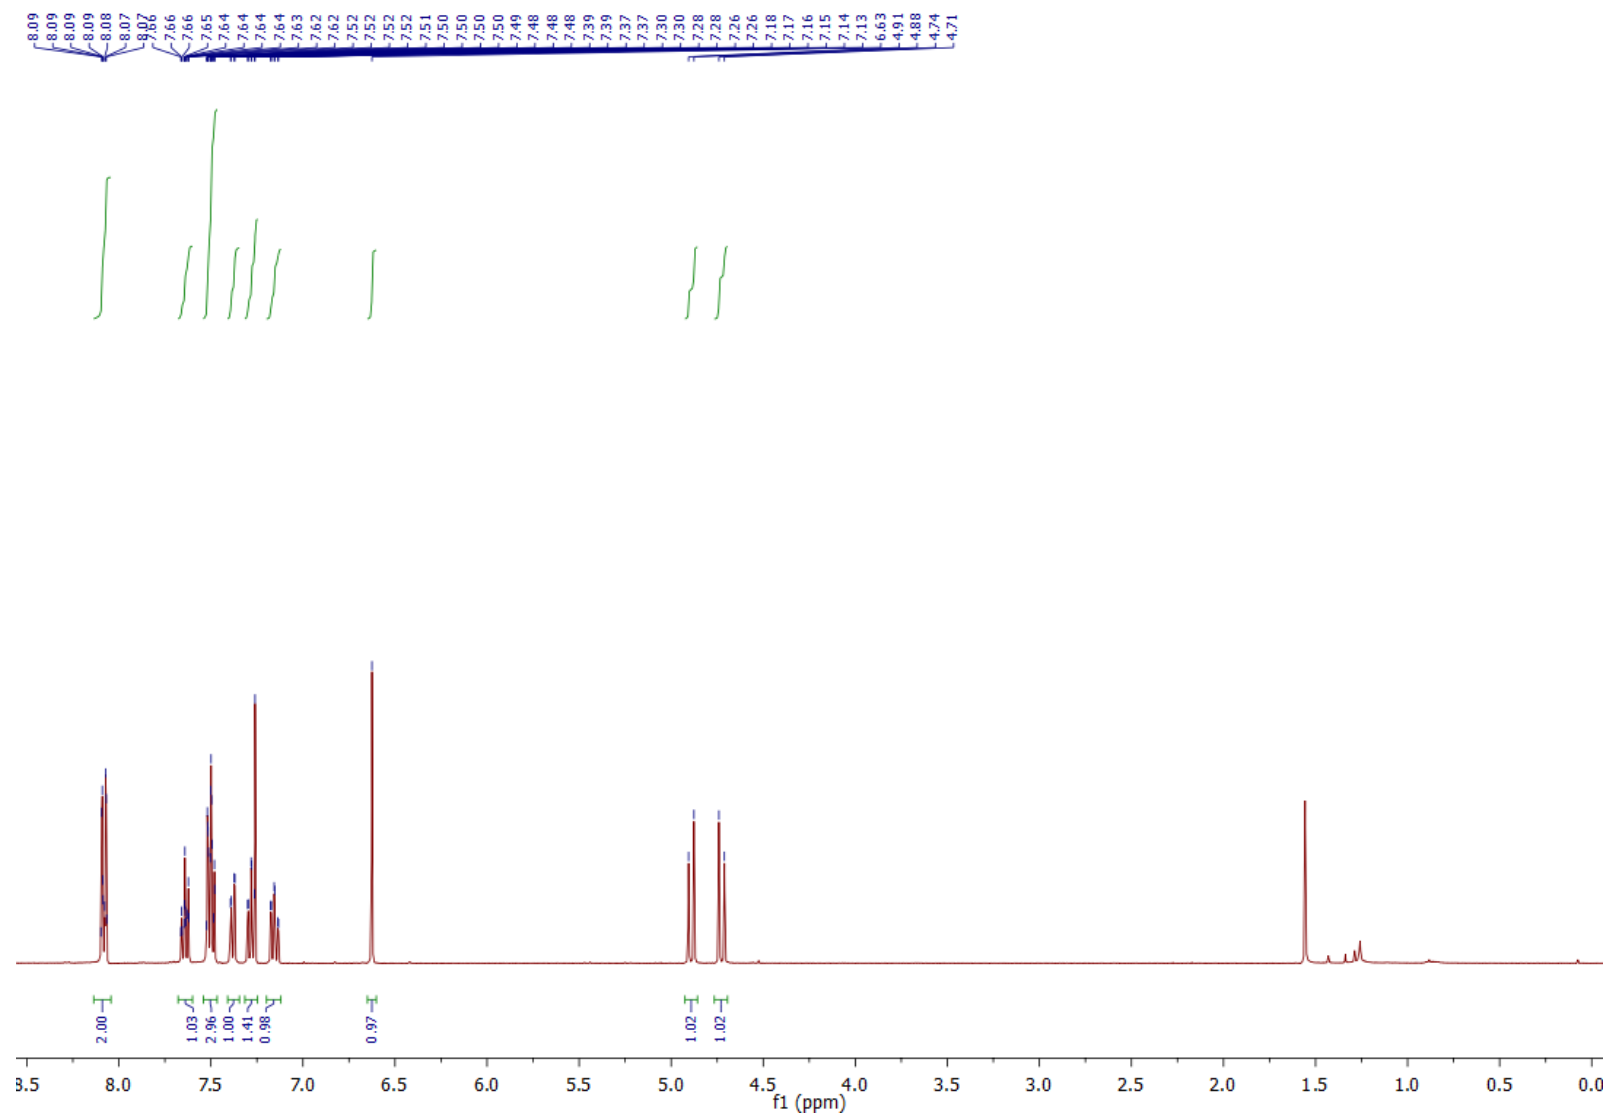

$^{13}\text{C}$  NMR ( $\text{CDCl}_3$ , 100 MHz). 2-((2-Bromobenzyl)oxy)-1-phenyl-2-((trifluoromethyl)thio)ethan-1-one (**5c**)

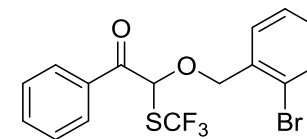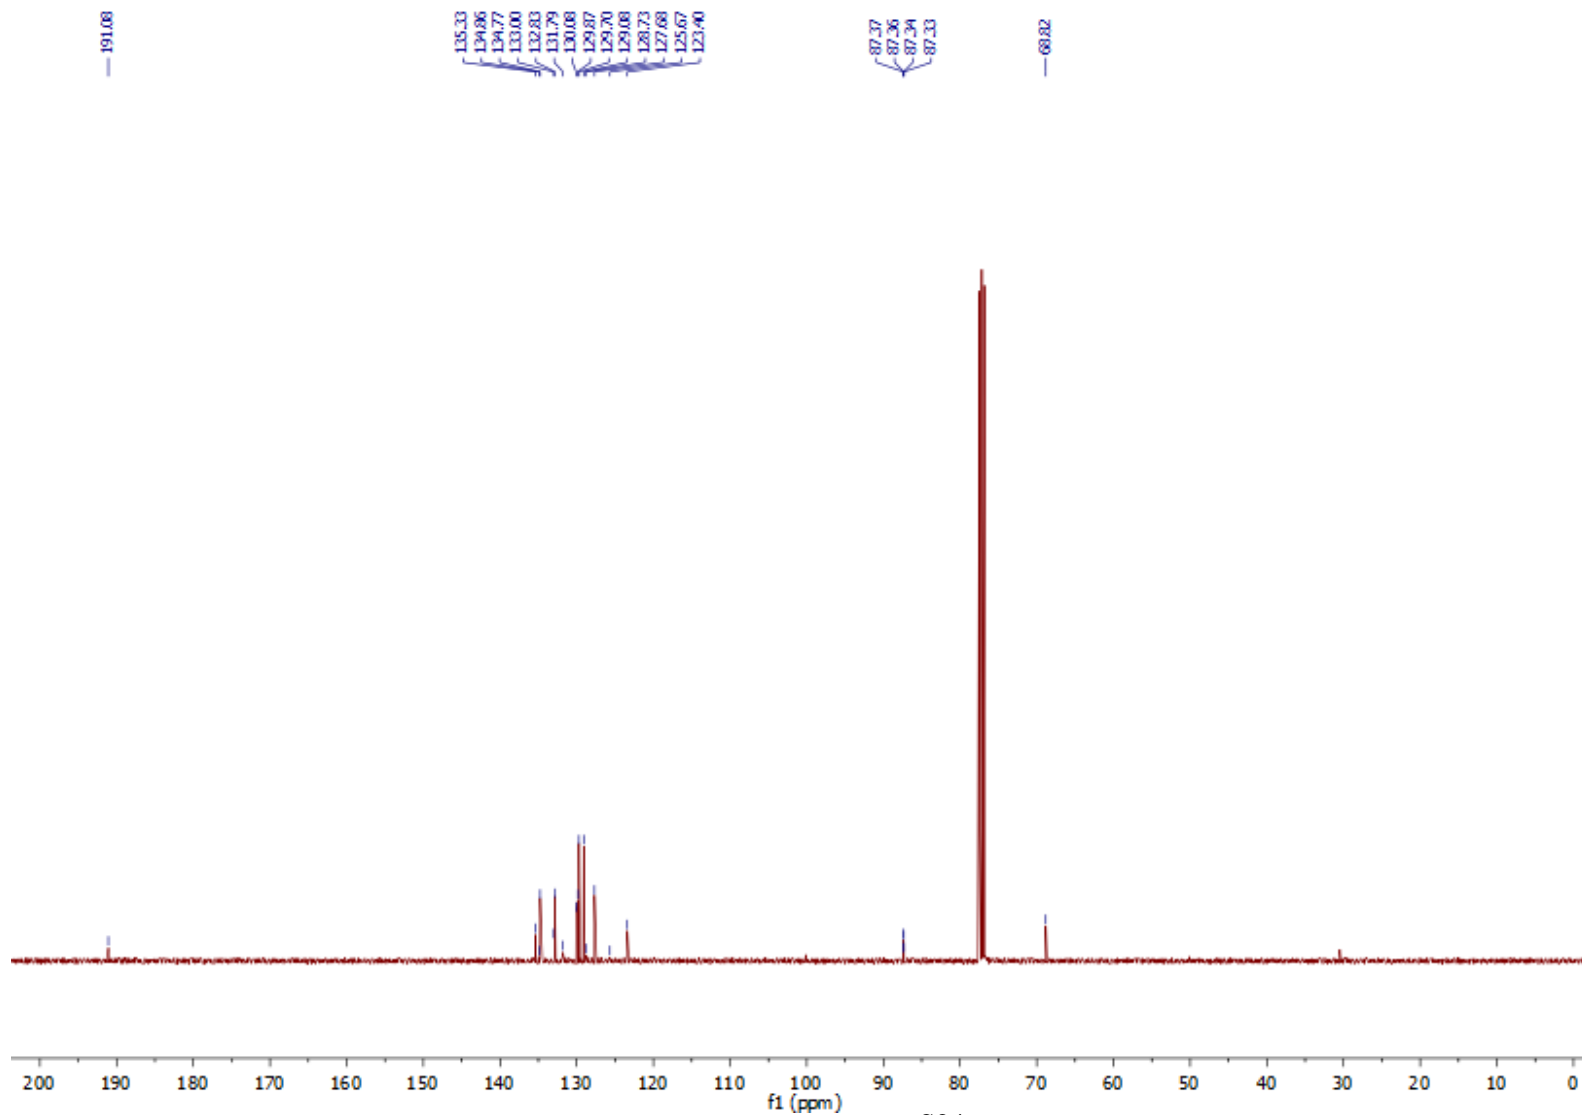



$^{19}\text{F}$  NMR ( $\text{CDCl}_3$ , 377 MHz). 2-((2-Bromobenzyl)oxy)-1-phenyl-2-((trifluoromethyl)thio)ethan-1-one (**5c**)

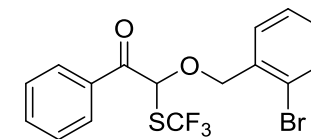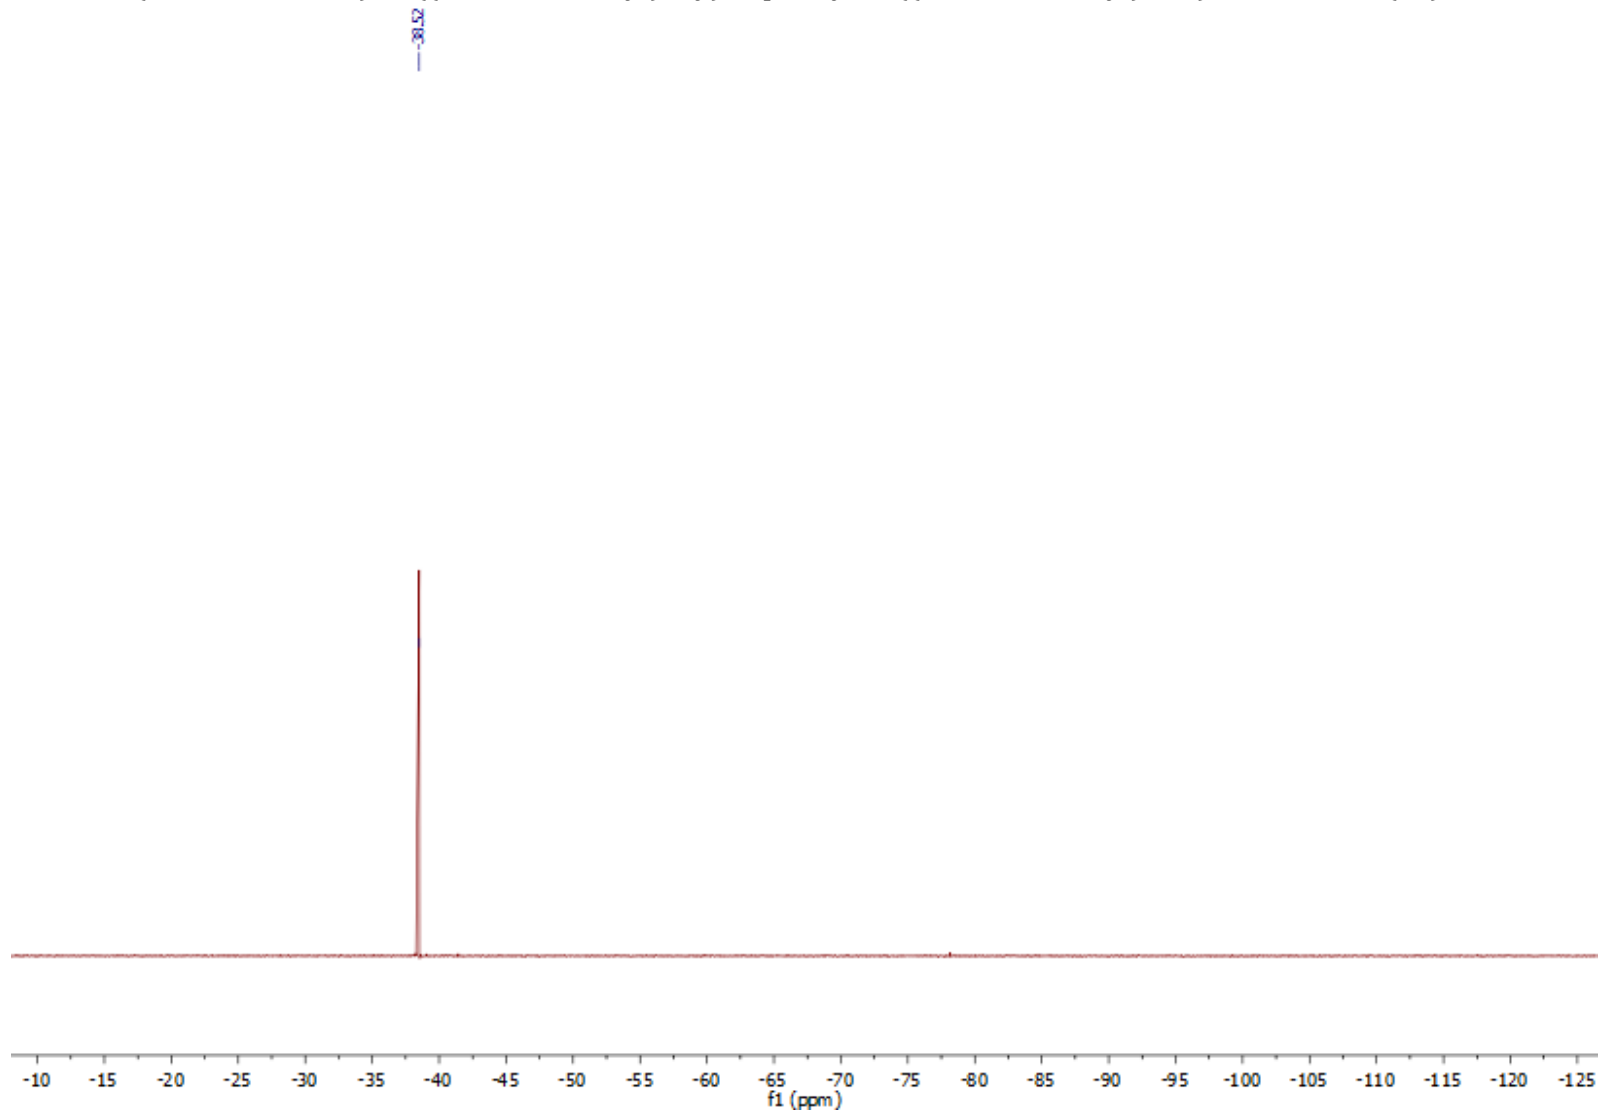

<sup>1</sup>H NMR (CDCl<sub>3</sub>, 400 MHz). 2-((4-Nitrobenzyl)oxy)-1-phenyl-2-((trifluoromethyl)thio)ethan-1-one (**5d**)

8.18  
8.17  
8.16  
8.15  
8.09  
8.08  
8.08  
8.08  
8.07  
8.06  
8.06  
7.68  
7.67  
7.66  
7.66  
7.55  
7.54  
7.53  
7.51  
7.51  
7.43  
7.43  
7.42  
7.41  
7.40  
6.73

4.98  
4.95  
4.64  
4.61

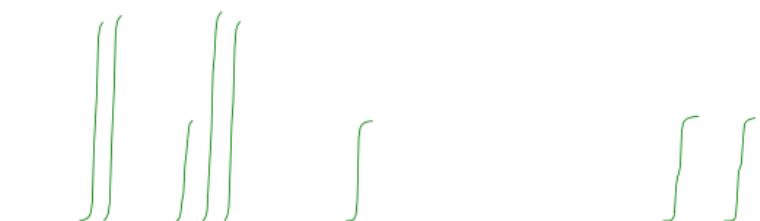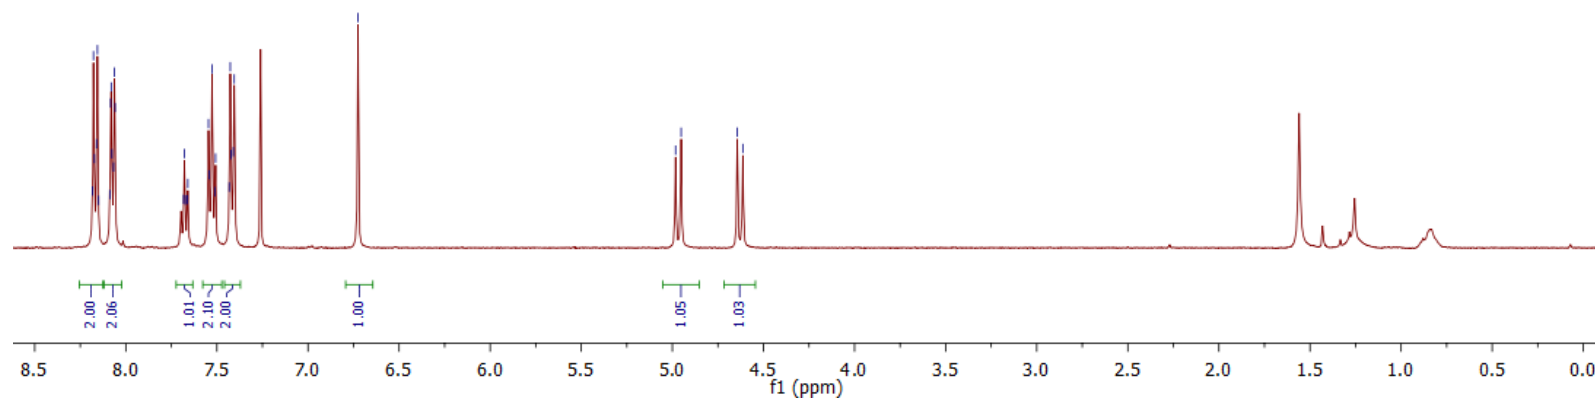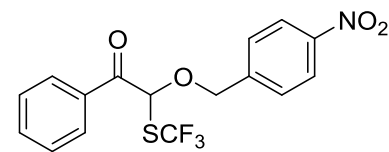

$^{13}\text{C}$  NMR ( $\text{CDCl}_3$ , 100 MHz). 2-((4-Nitrobenzyl)oxy)-1-phenyl-2-((trifluoromethyl)thio)ethan-1-one (**5d**)

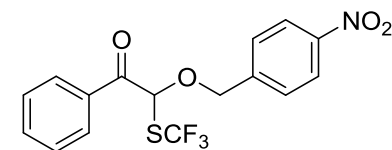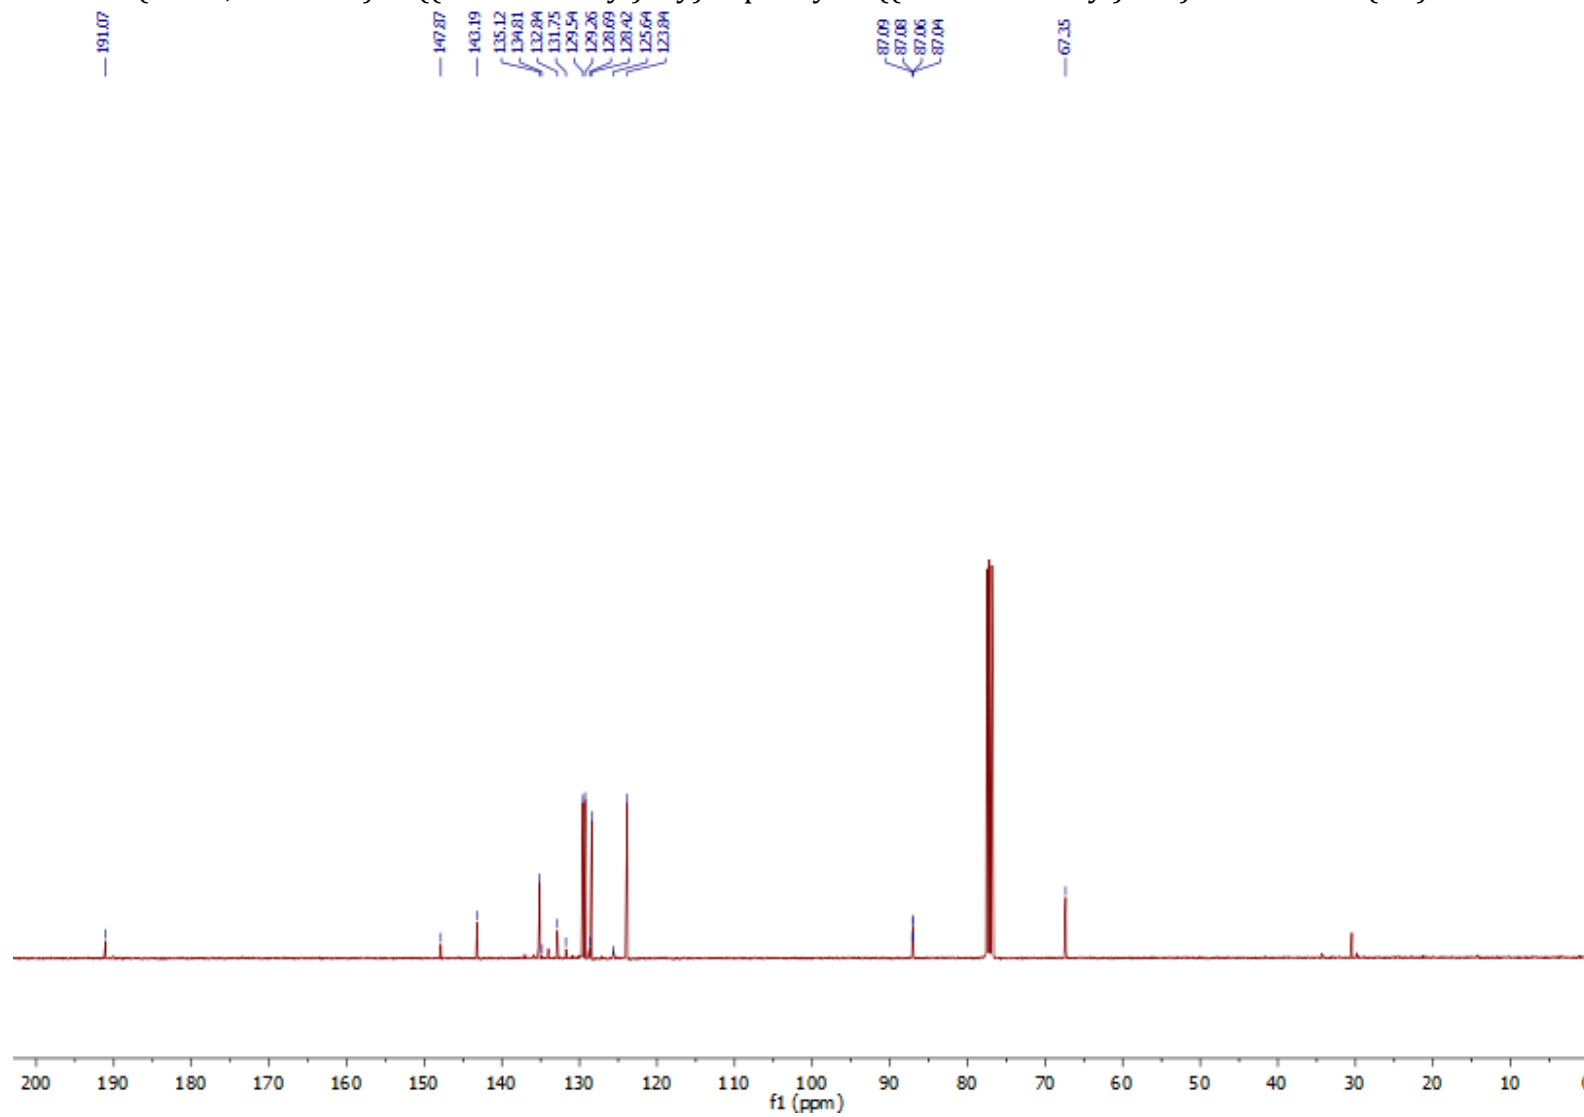

$^{19}\text{F}$  NMR ( $\text{CDCl}_3$ , 377 MHz). 2-((4-Nitrobenzyl)oxy)-1-phenyl-2-((trifluoromethyl)thio)ethan-1-one (**5d**)

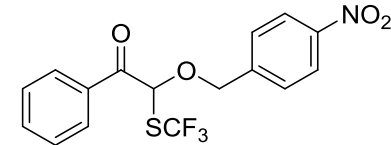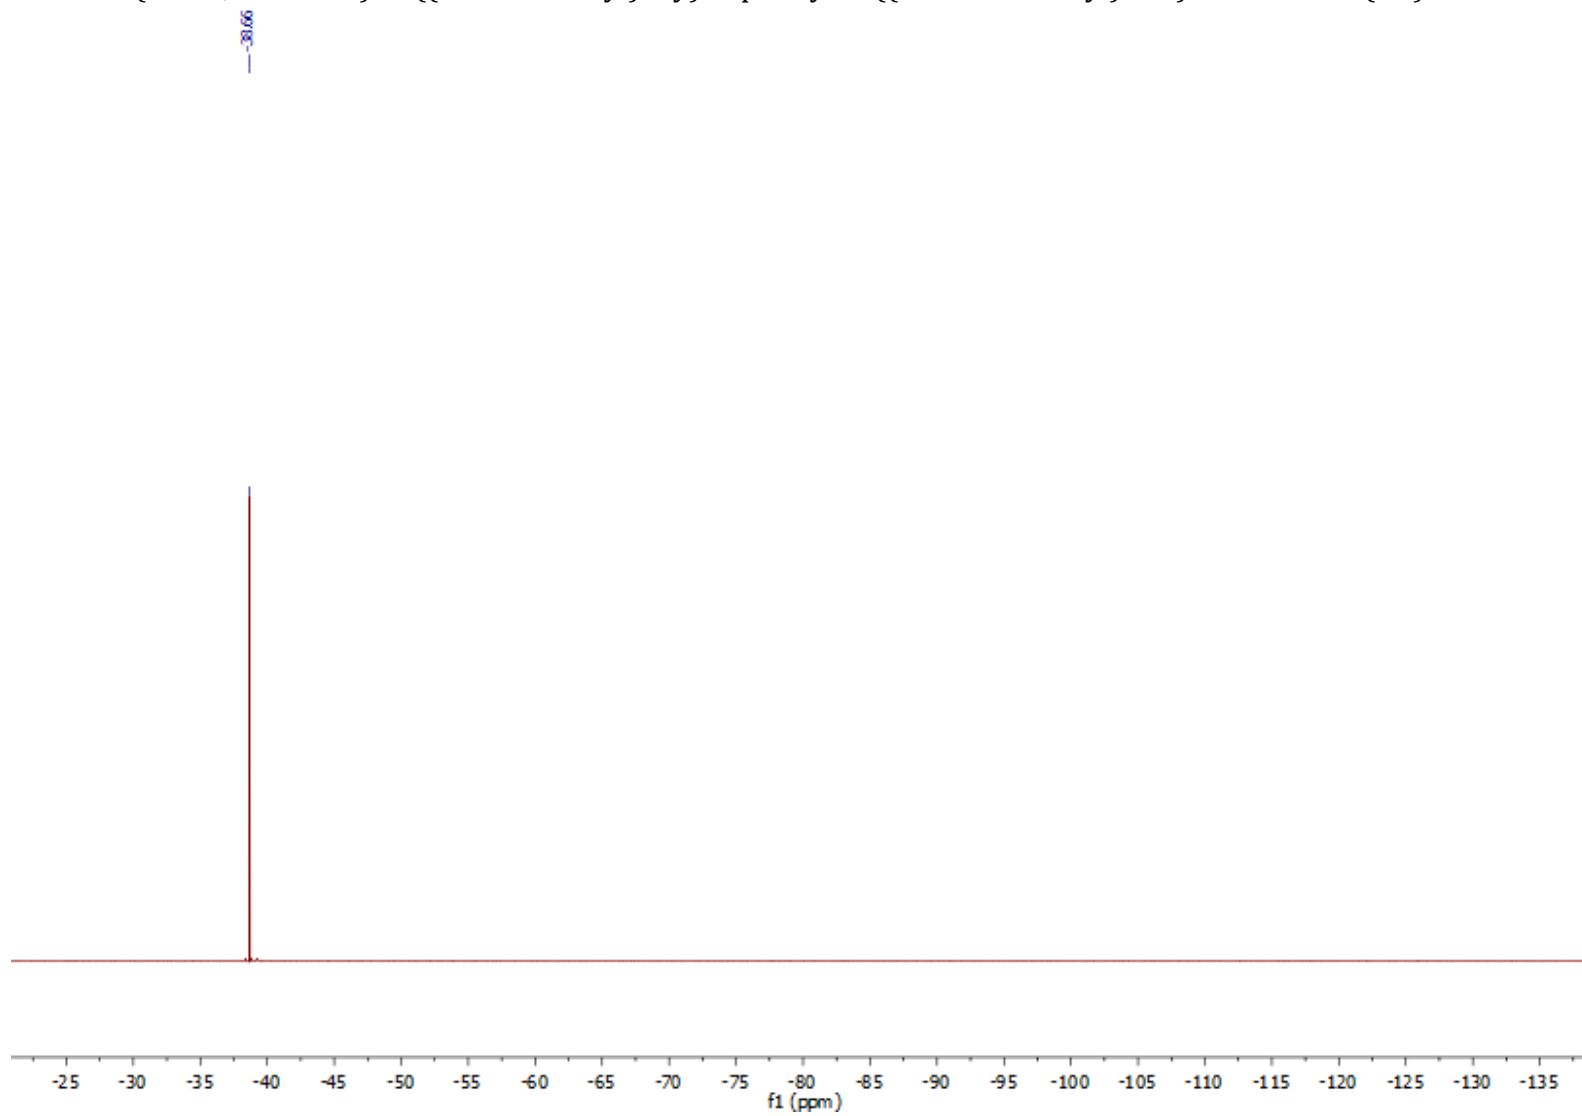

$^1\text{H}$  NMR ( $\text{CDCl}_3$ , 400 MHz). 2-(Benzo[d][1,3]dioxol-5-ylmethoxy)-1-phenyl-2-((trifluoromethyl)thio)ethan-1-one (**5e**)

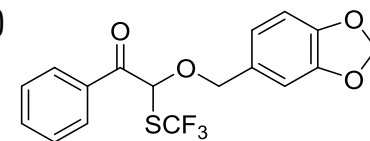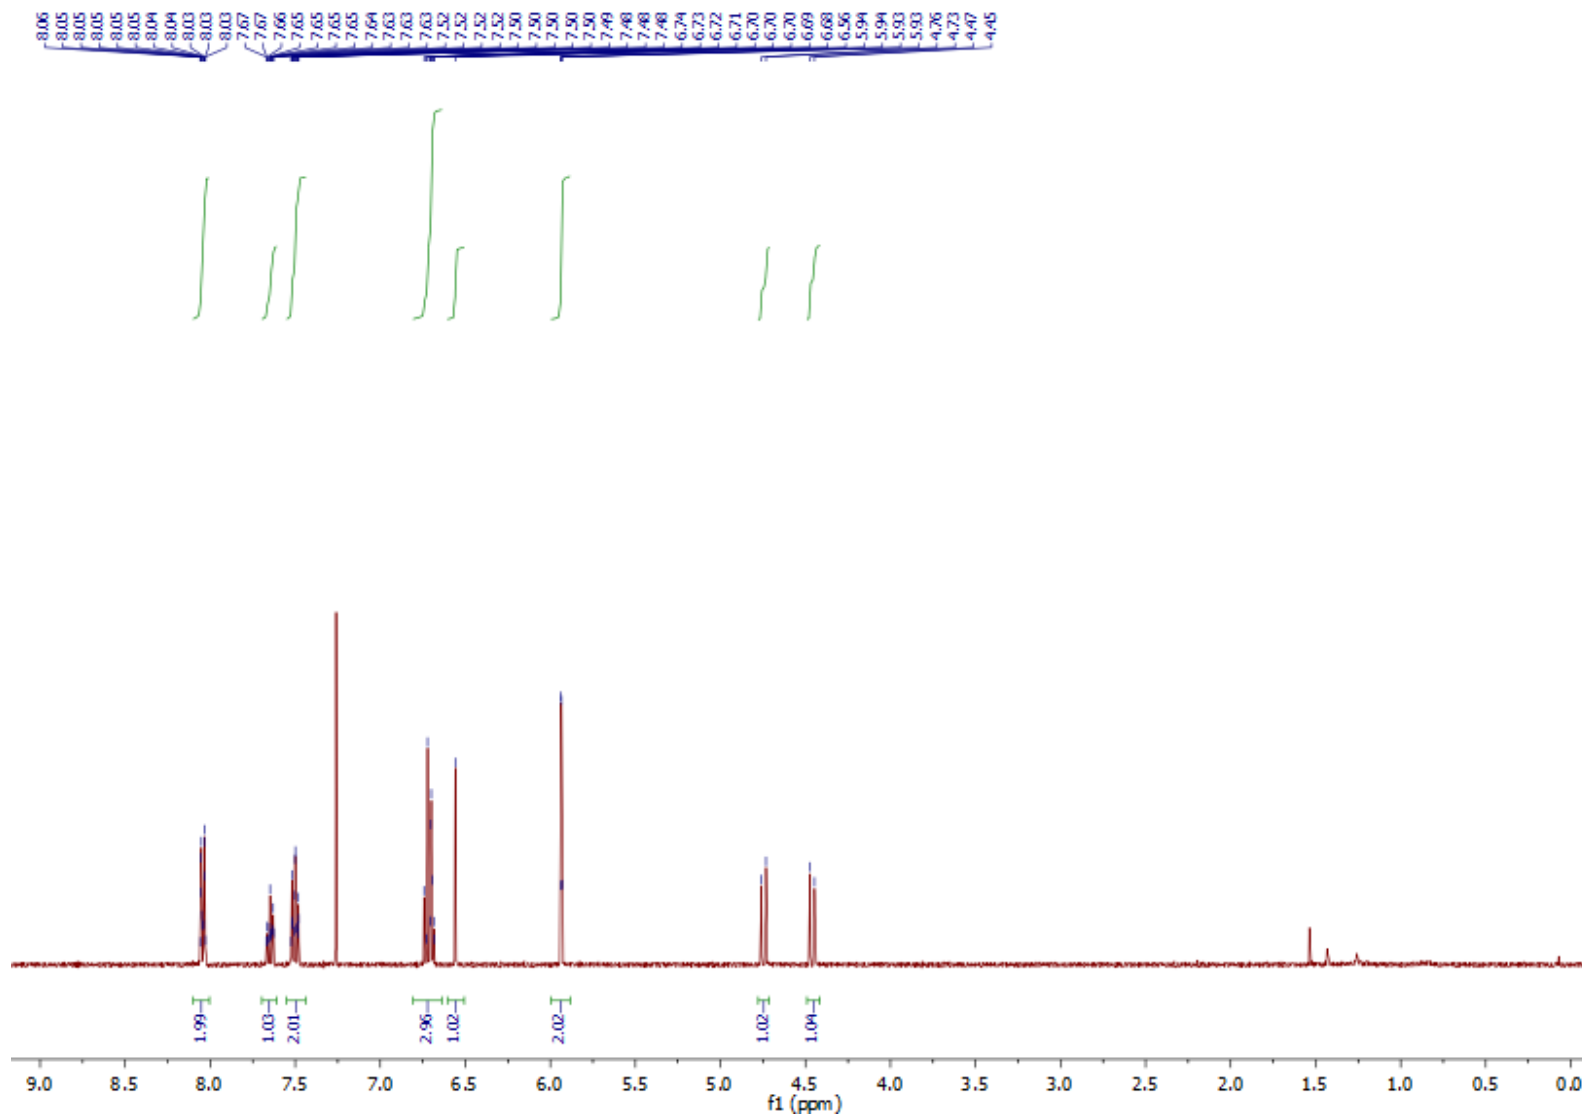

$^{13}\text{C}$  NMR ( $\text{CDCl}_3$ , 100 MHz). 2-(Benzo[d][1,3]dioxol-5-ylmethoxy)-1-phenyl-2-((trifluoromethyl)thio)ethan-1-one (**5e**)

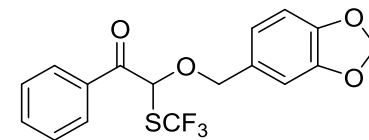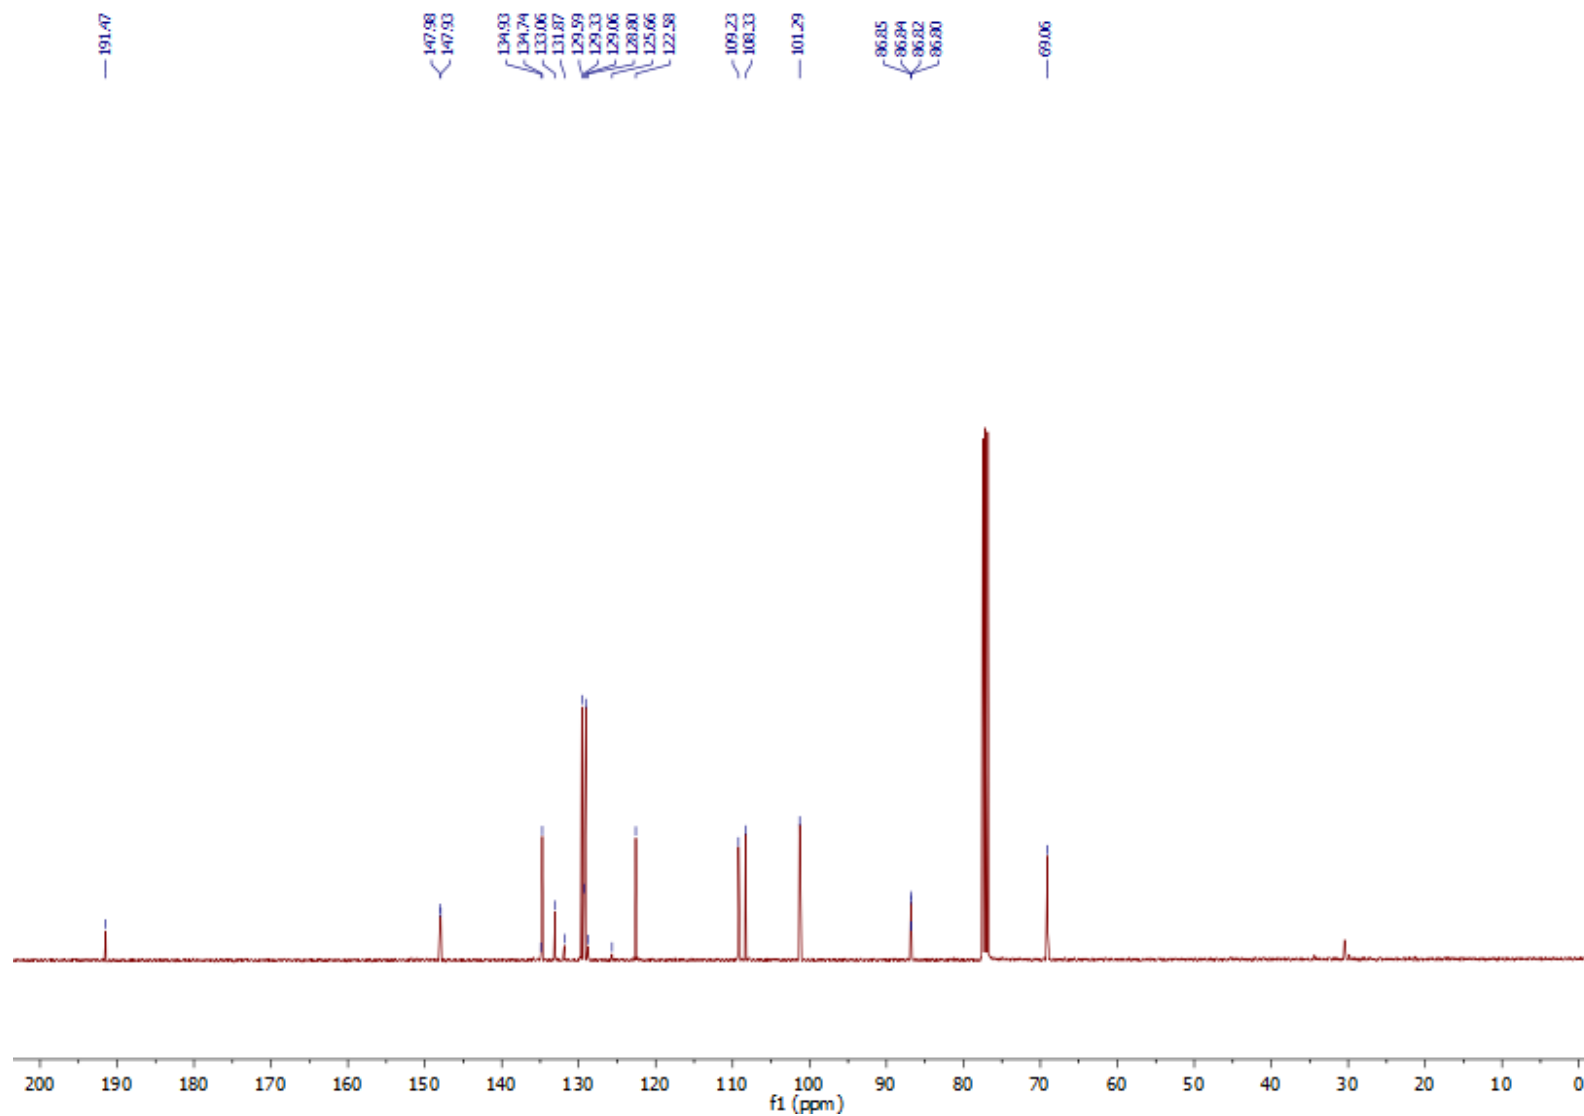

$^{19}\text{F}$  NMR ( $\text{CDCl}_3$ , 377 MHz). 2-(Benzo[*d*][1,3]dioxol-5-ylmethoxy)-1-phenyl-2-((trifluoromethyl)thio)ethan-1-one (**5e**)

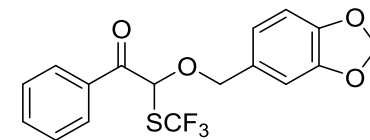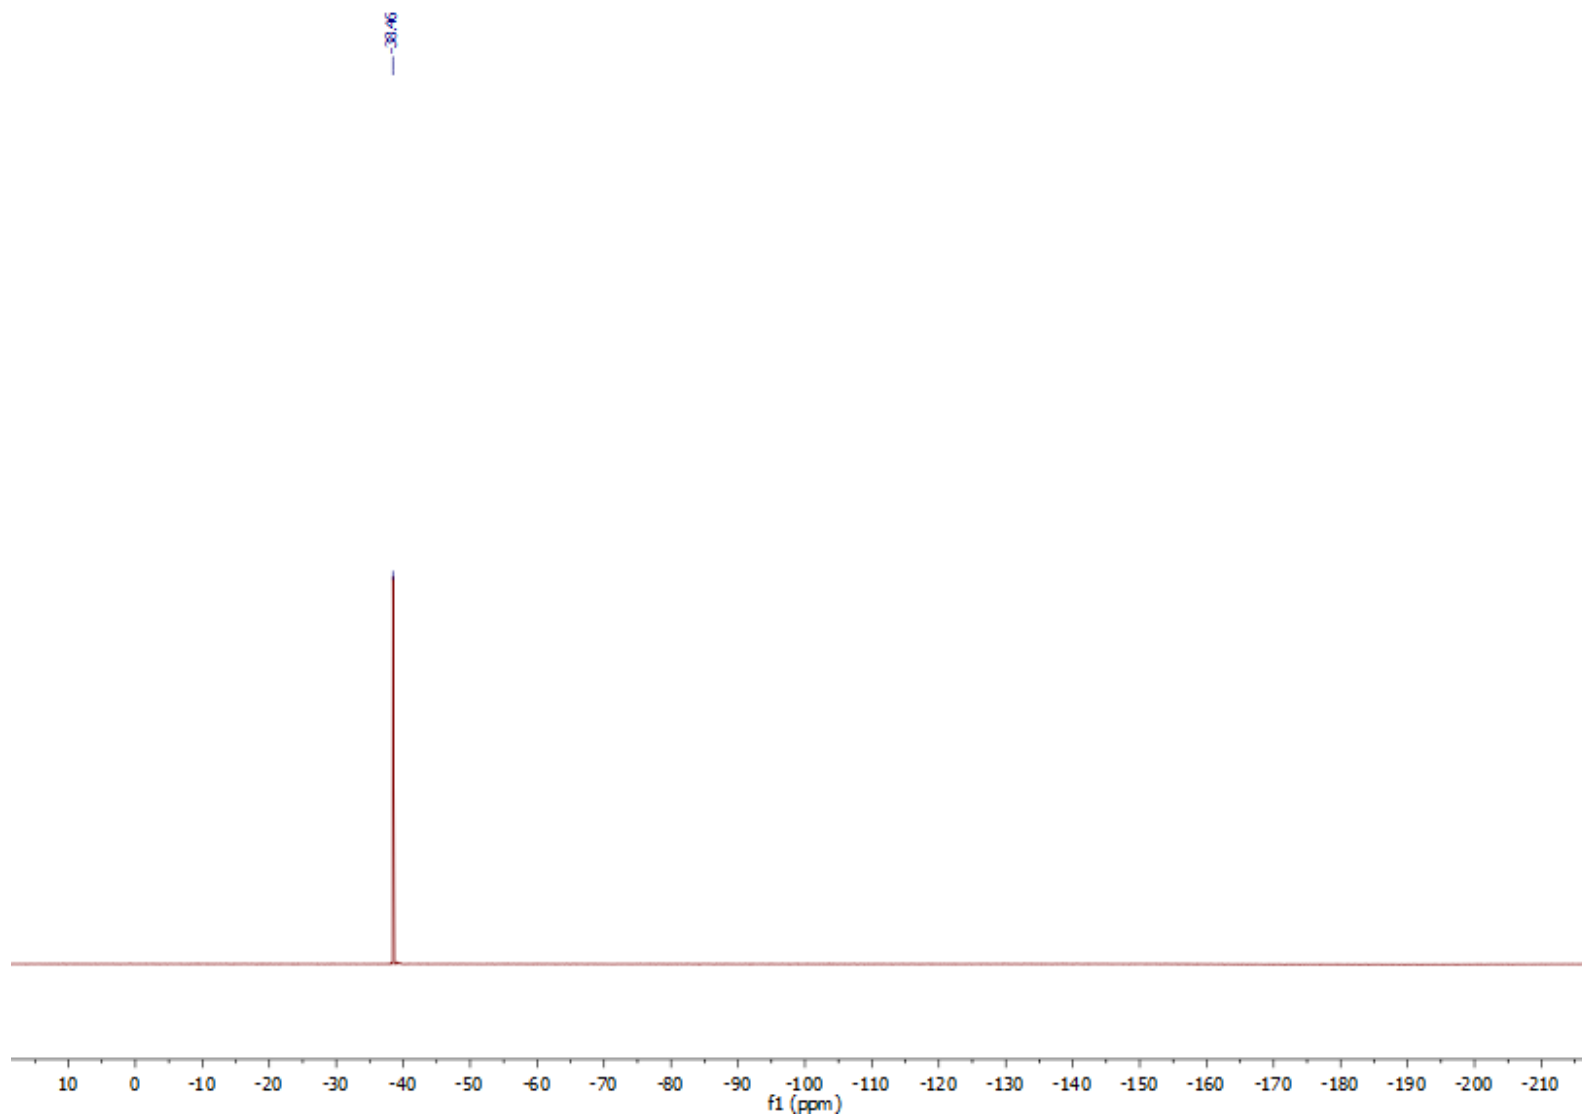

$^1\text{H}$  NMR ( $\text{CDCl}_3$ , 400 MHz). 2-(Hexyloxy)-1-phenyl-2-((trifluoromethyl)thio)ethan-1-one (**5f**)

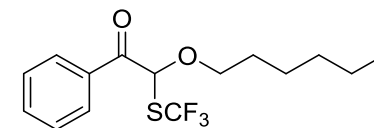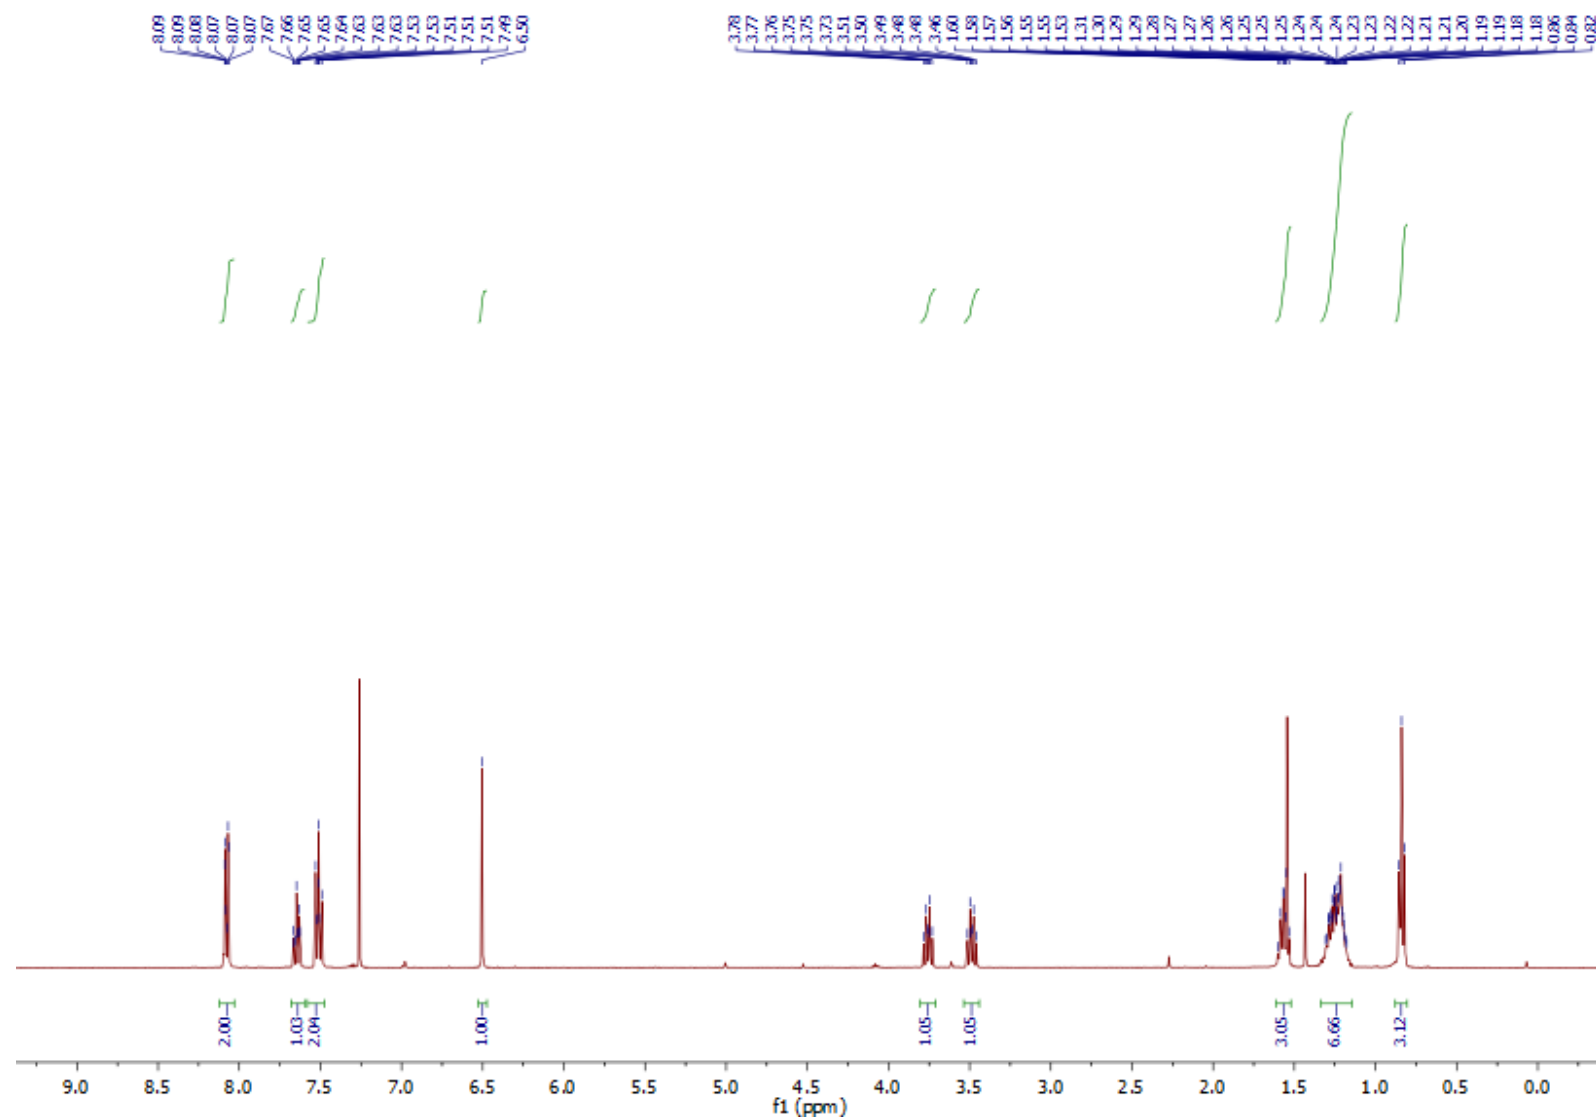



$^{13}\text{C}$  NMR ( $\text{CDCl}_3$ , 100 MHz). 2-(Hexyloxy)-1-phenyl-2-((trifluoromethyl)thio)ethan-1-one (**5f**)

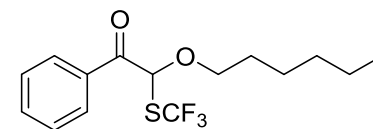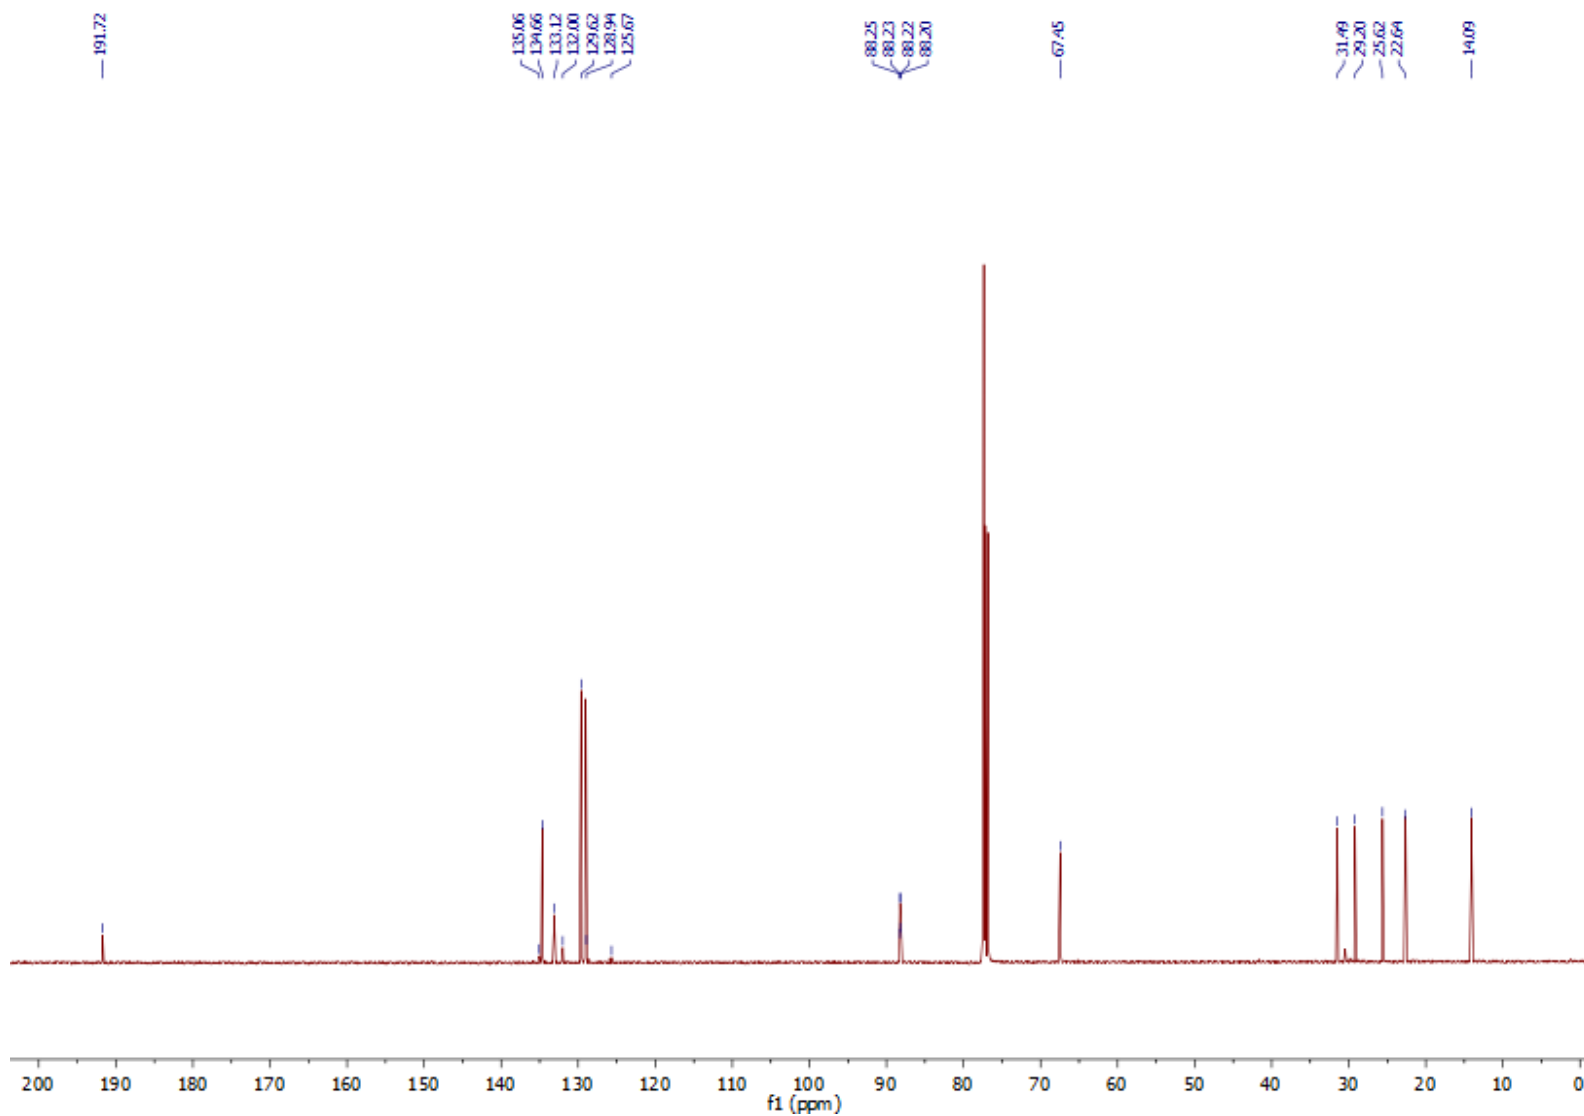

$^{19}\text{F}$  NMR ( $\text{CDCl}_3$ , 377 MHz). 2-(Hexyloxy)-1-phenyl-2-((trifluoromethyl)thio)ethan-1-one (**5f**)

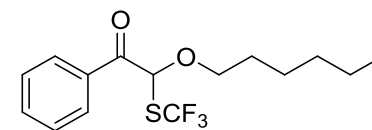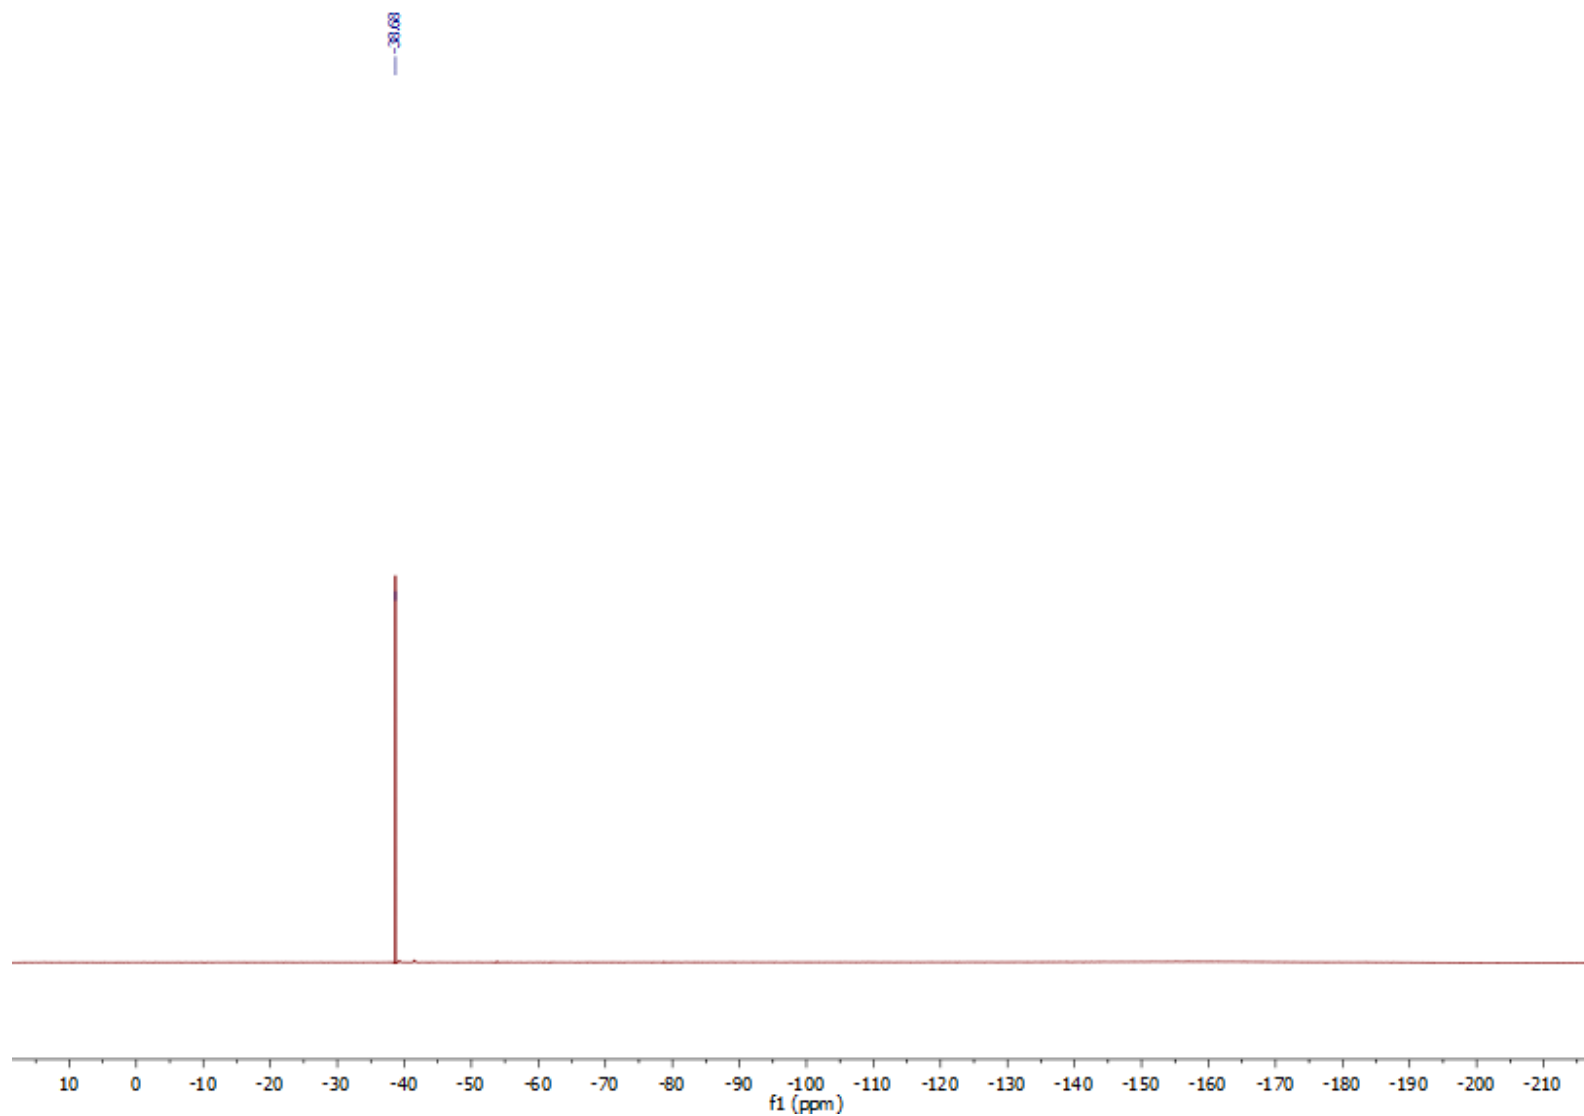

[illegible]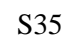

$^{13}\text{C}$  NMR ( $\text{CDCl}_3$ , 100 MHz). 2-(Cycloheptyloxy)-1-phenyl-2-((trifluoromethyl)thio)ethan-1-one (**5g**)

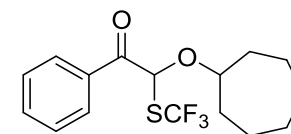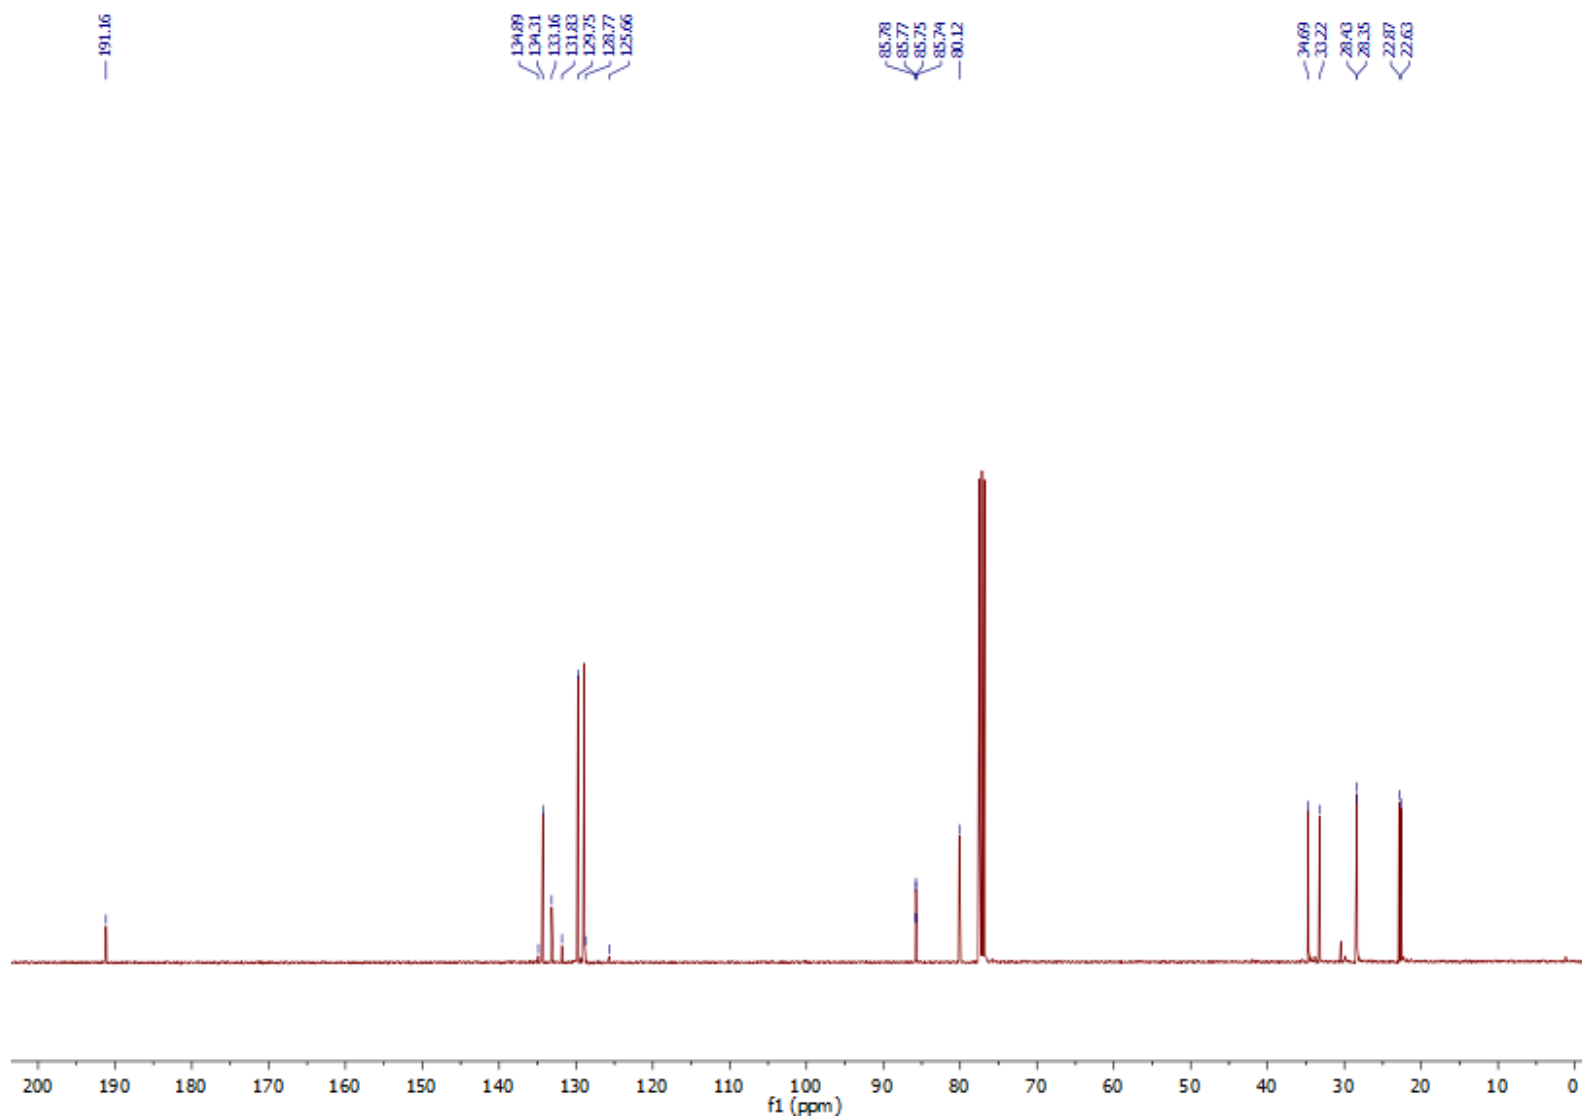

$^{19}\text{F}$  NMR ( $\text{CDCl}_3$ , 377 MHz). 2-(Cycloheptyloxy)-1-phenyl-2-((trifluoromethyl)thio)ethan-1-one (**5g**)

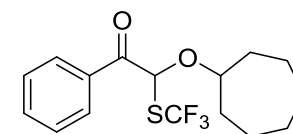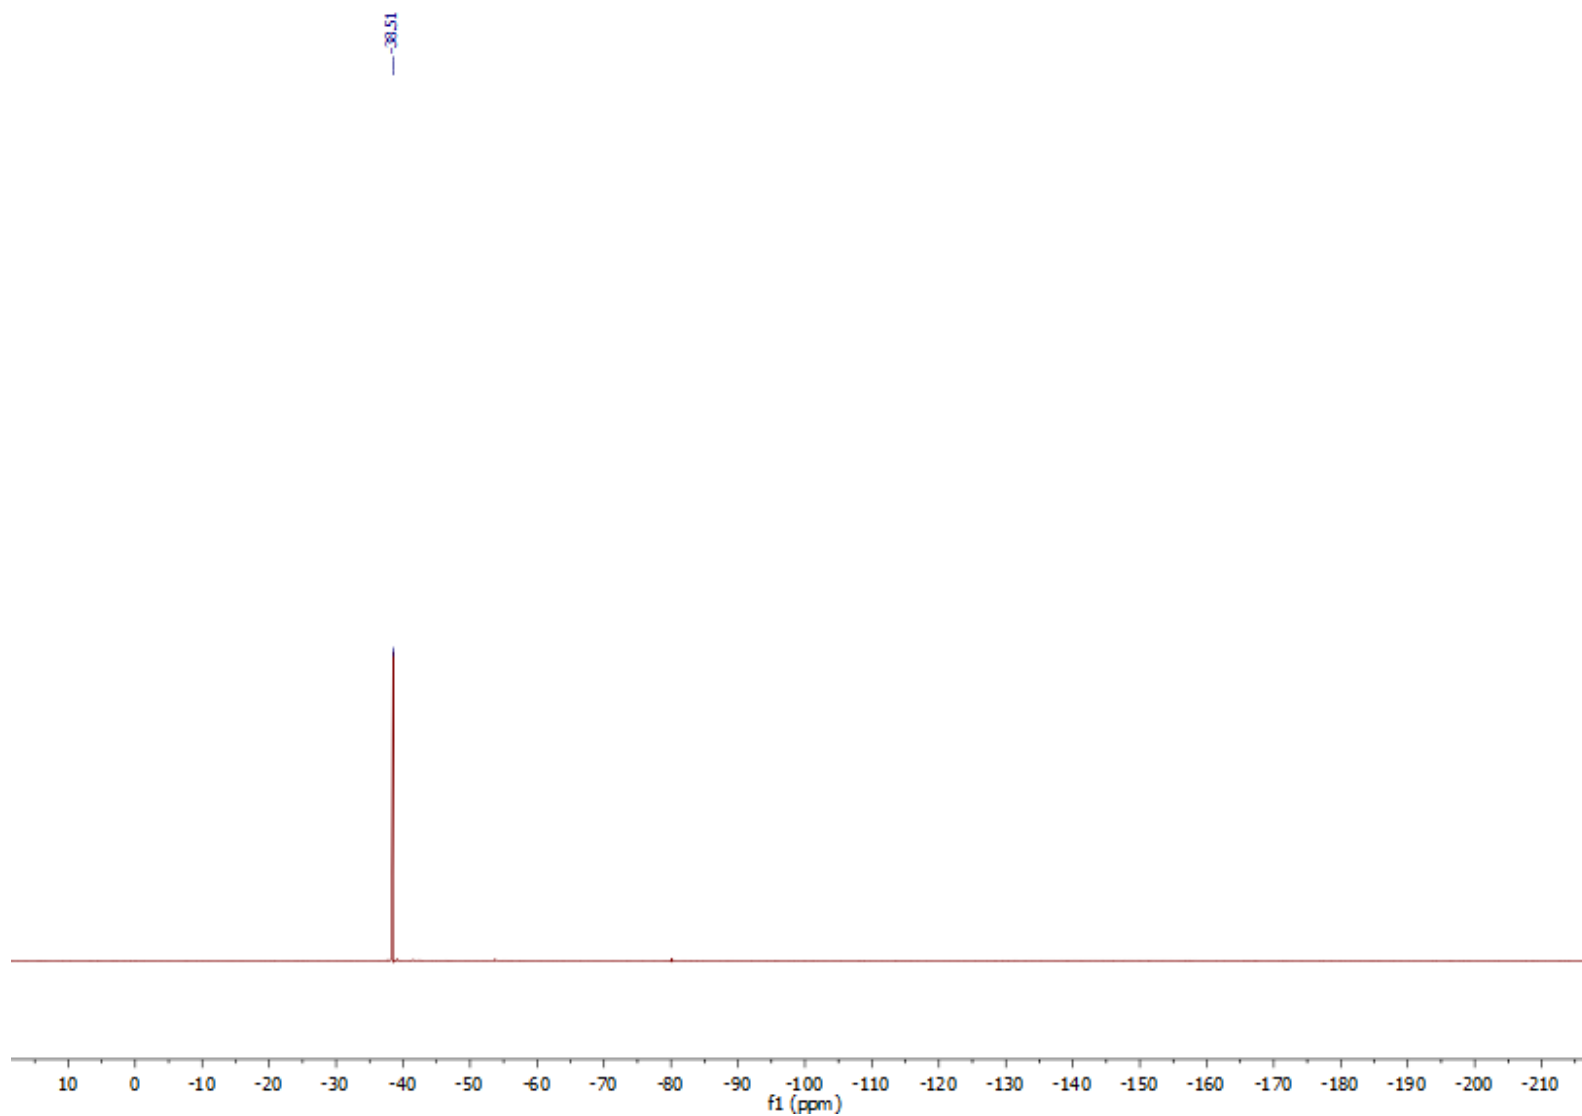

$^1\text{H}$  NMR ( $\text{CDCl}_3$ , 400 MHz). 2-(((1*R*,2*S*,5*R*)-2-Isopropyl-5-methylcyclohexyl)oxy)-1-phenyl-2-((trifluoromethyl)thio)ethan-1-one (**5h**)

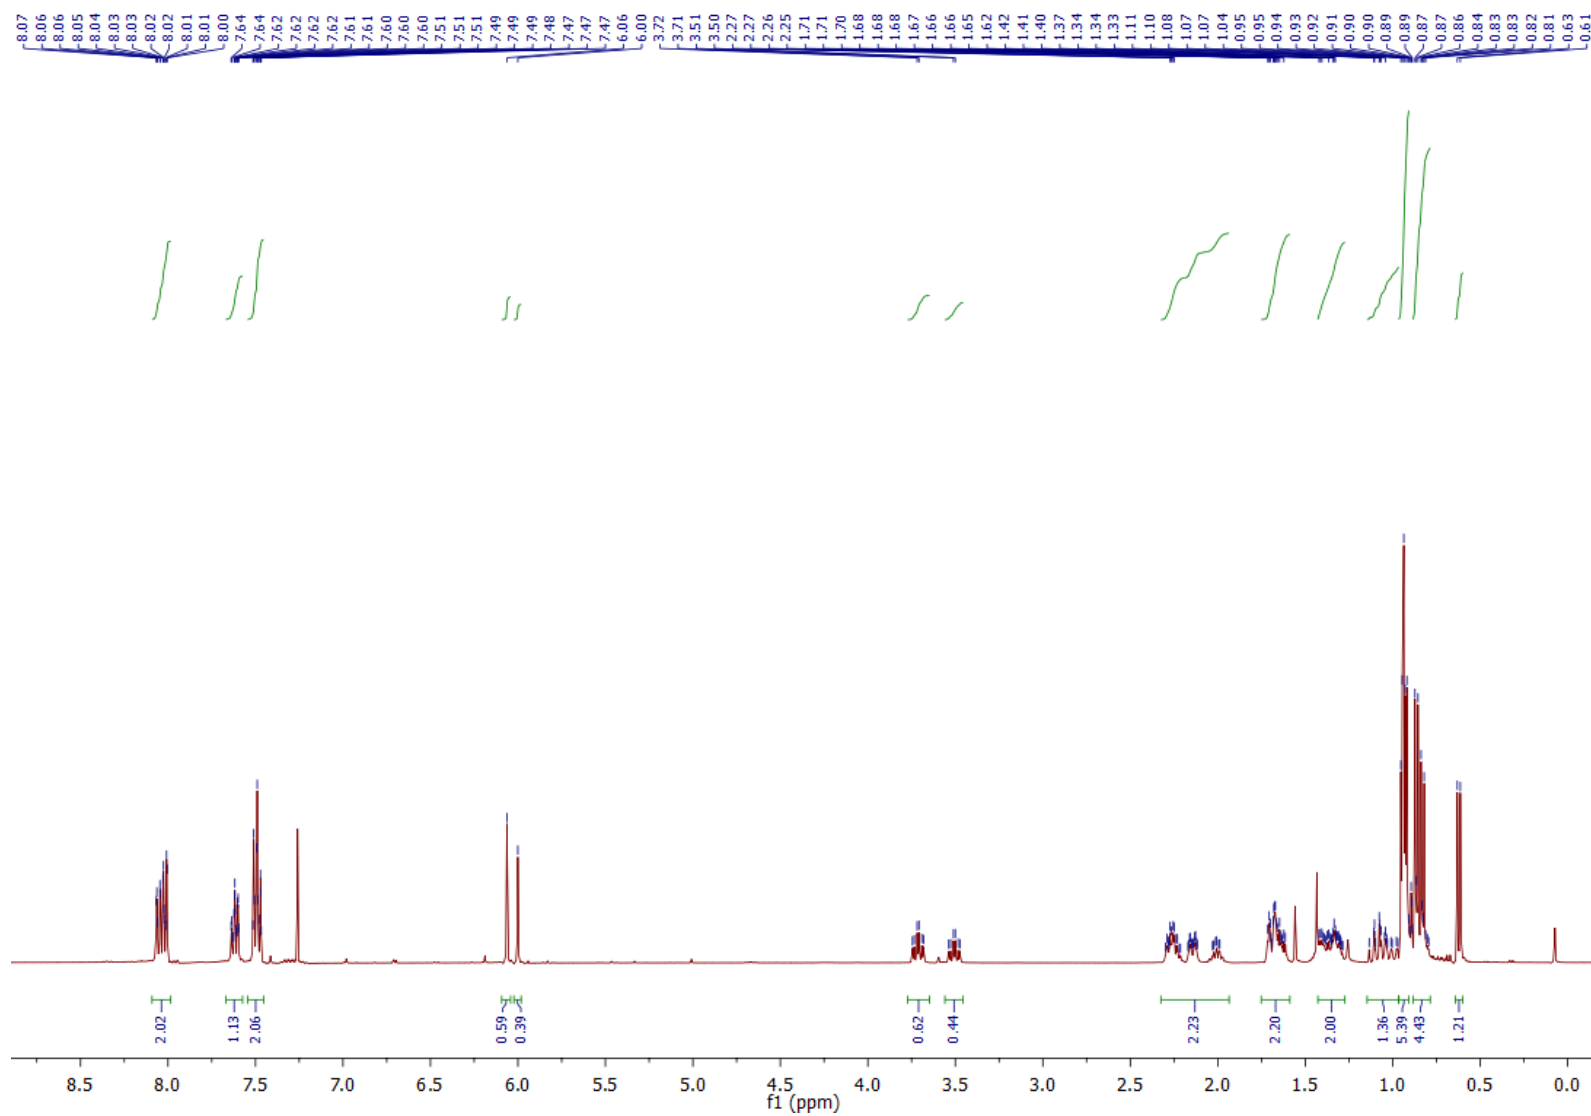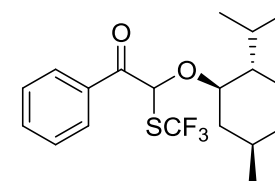

$^{13}\text{C}$  NMR ( $\text{CDCl}_3$ , 100 MHz). 2-(((1*R*,2*S*,5*R*)-2-Isopropyl-5-methylcyclohexyl)oxy)-1-phenyl-2-((trifluoromethyl)thio)ethan-1-one (**5h**)

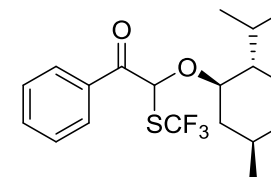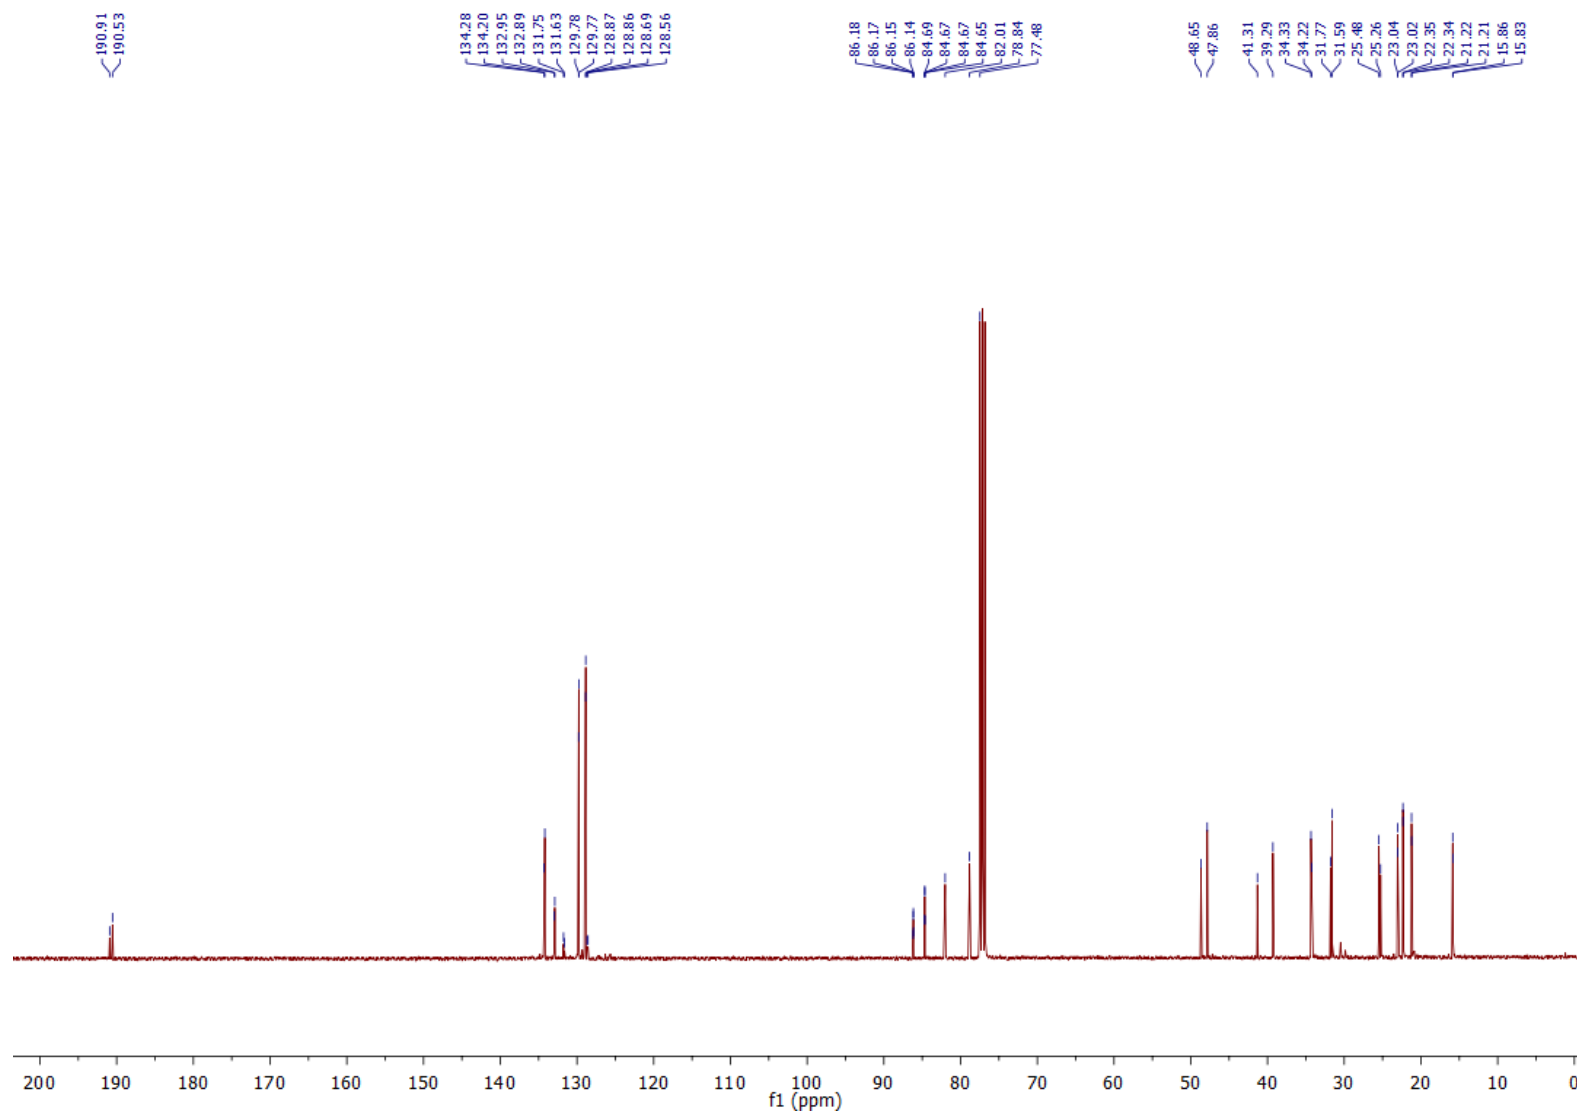

$^{19}\text{F}$  NMR ( $\text{CDCl}_3$ , 377 MHz). 2-(((1*R*,2*S*,5*R*)-2-Isopropyl-5-methylcyclohexyl)oxy)-1-phenyl-2-((trifluoromethyl)thio)ethan-1-one (**5h**)

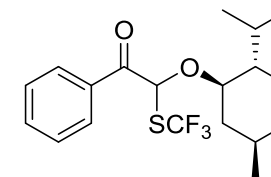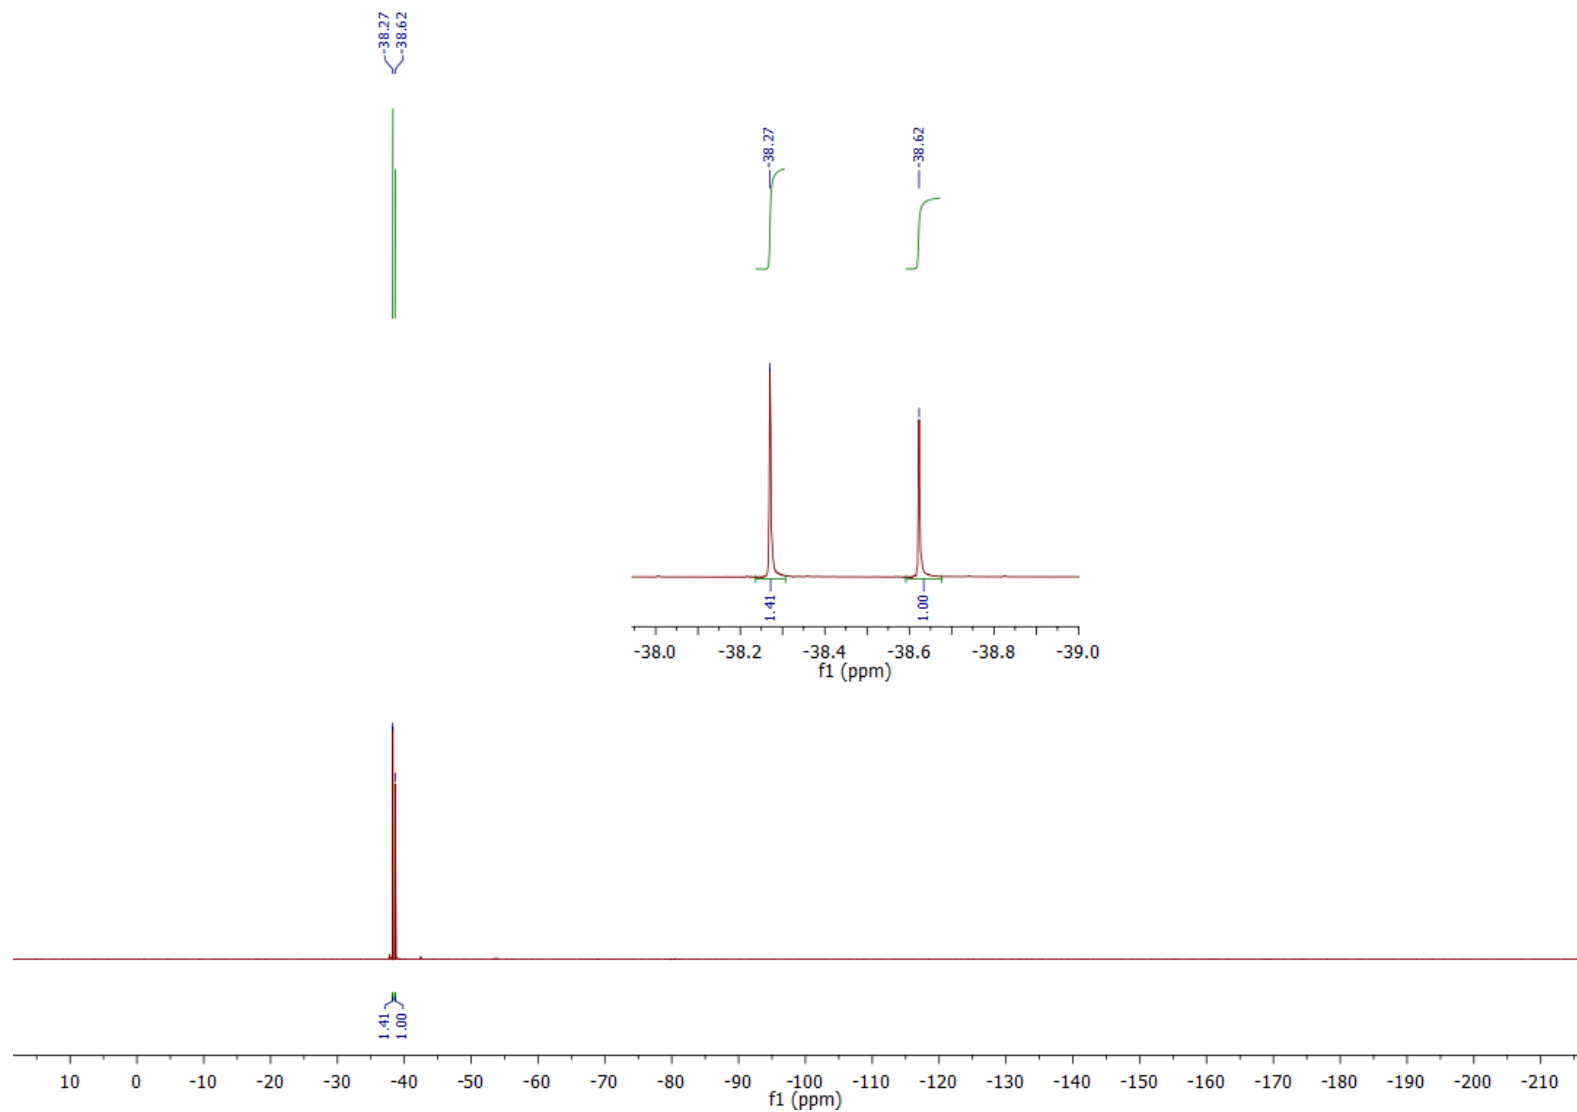



<sup>1</sup>H NMR (CDCl<sub>3</sub>, 400 MHz). 2-((3-Methylbut-2-en-1-yl)oxy)-1-phenyl-2-((trifluoromethyl)thio)ethan-1-one (**5i**)

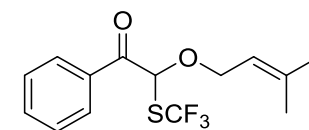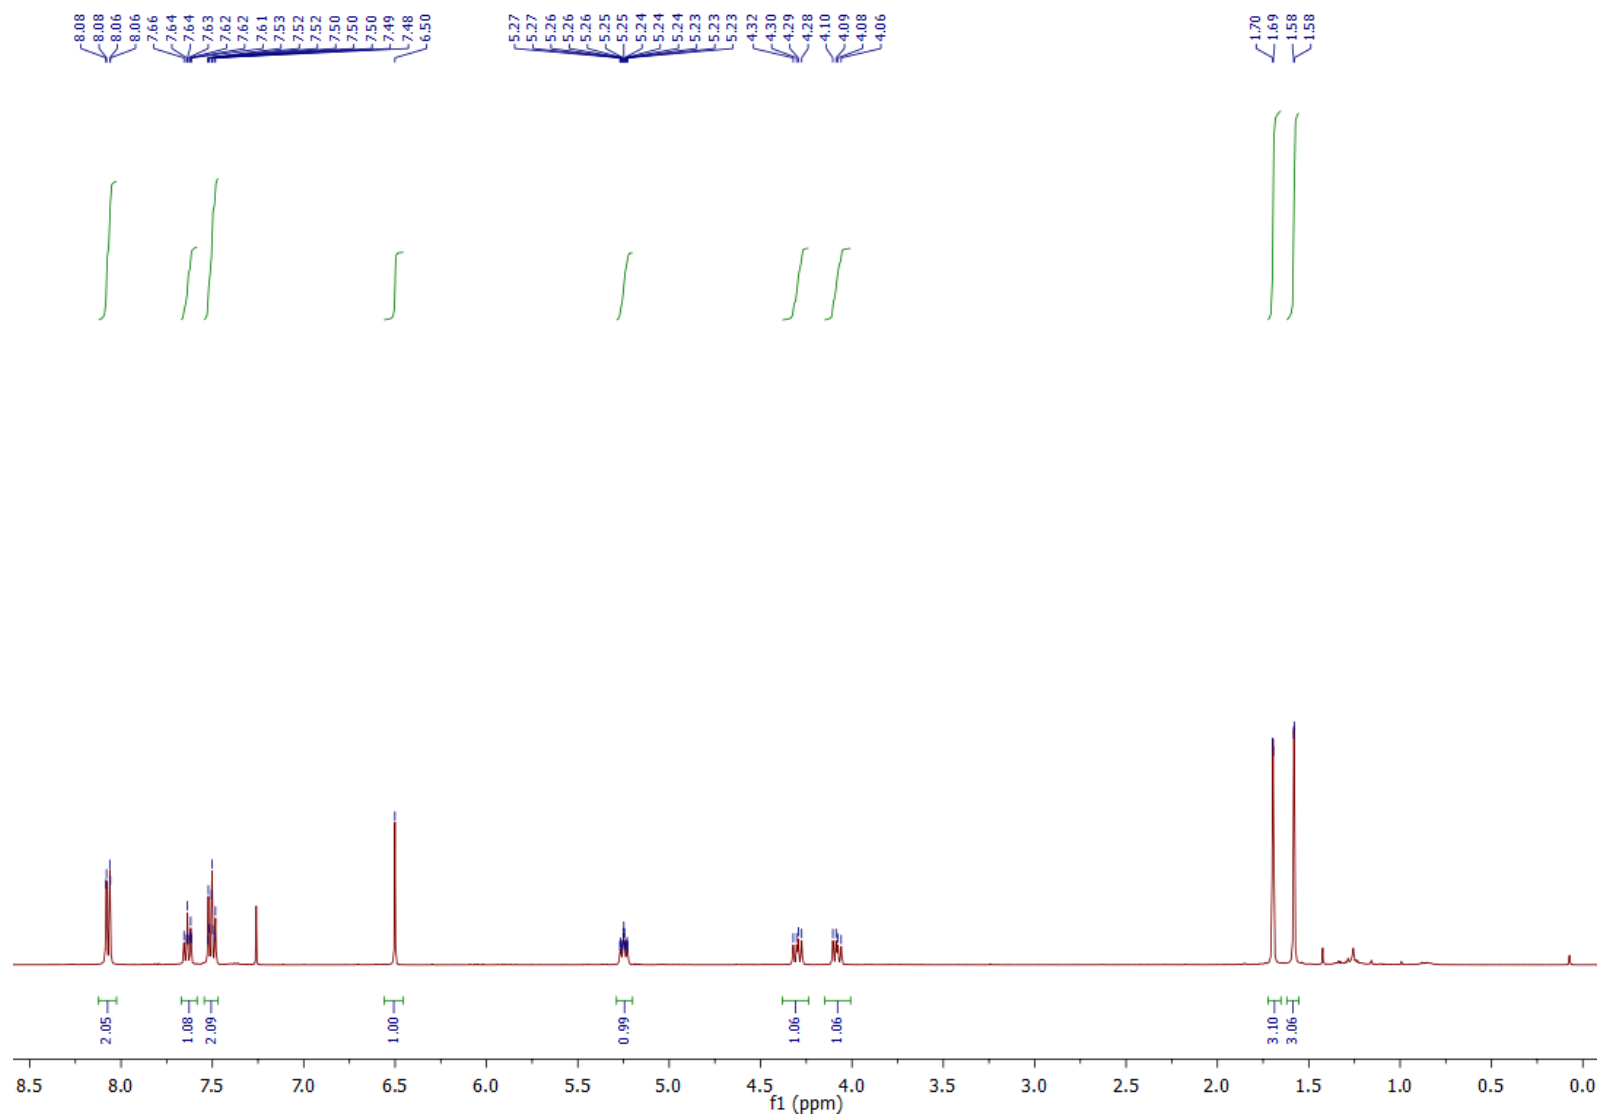

$^{13}\text{C}$  NMR ( $\text{CDCl}_3$ , 100 MHz). 2-((3-Methylbut-2-en-1-yl)oxy)-1-phenyl-2-((trifluoromethyl)thio)ethan-1-one (**5i**)

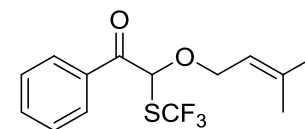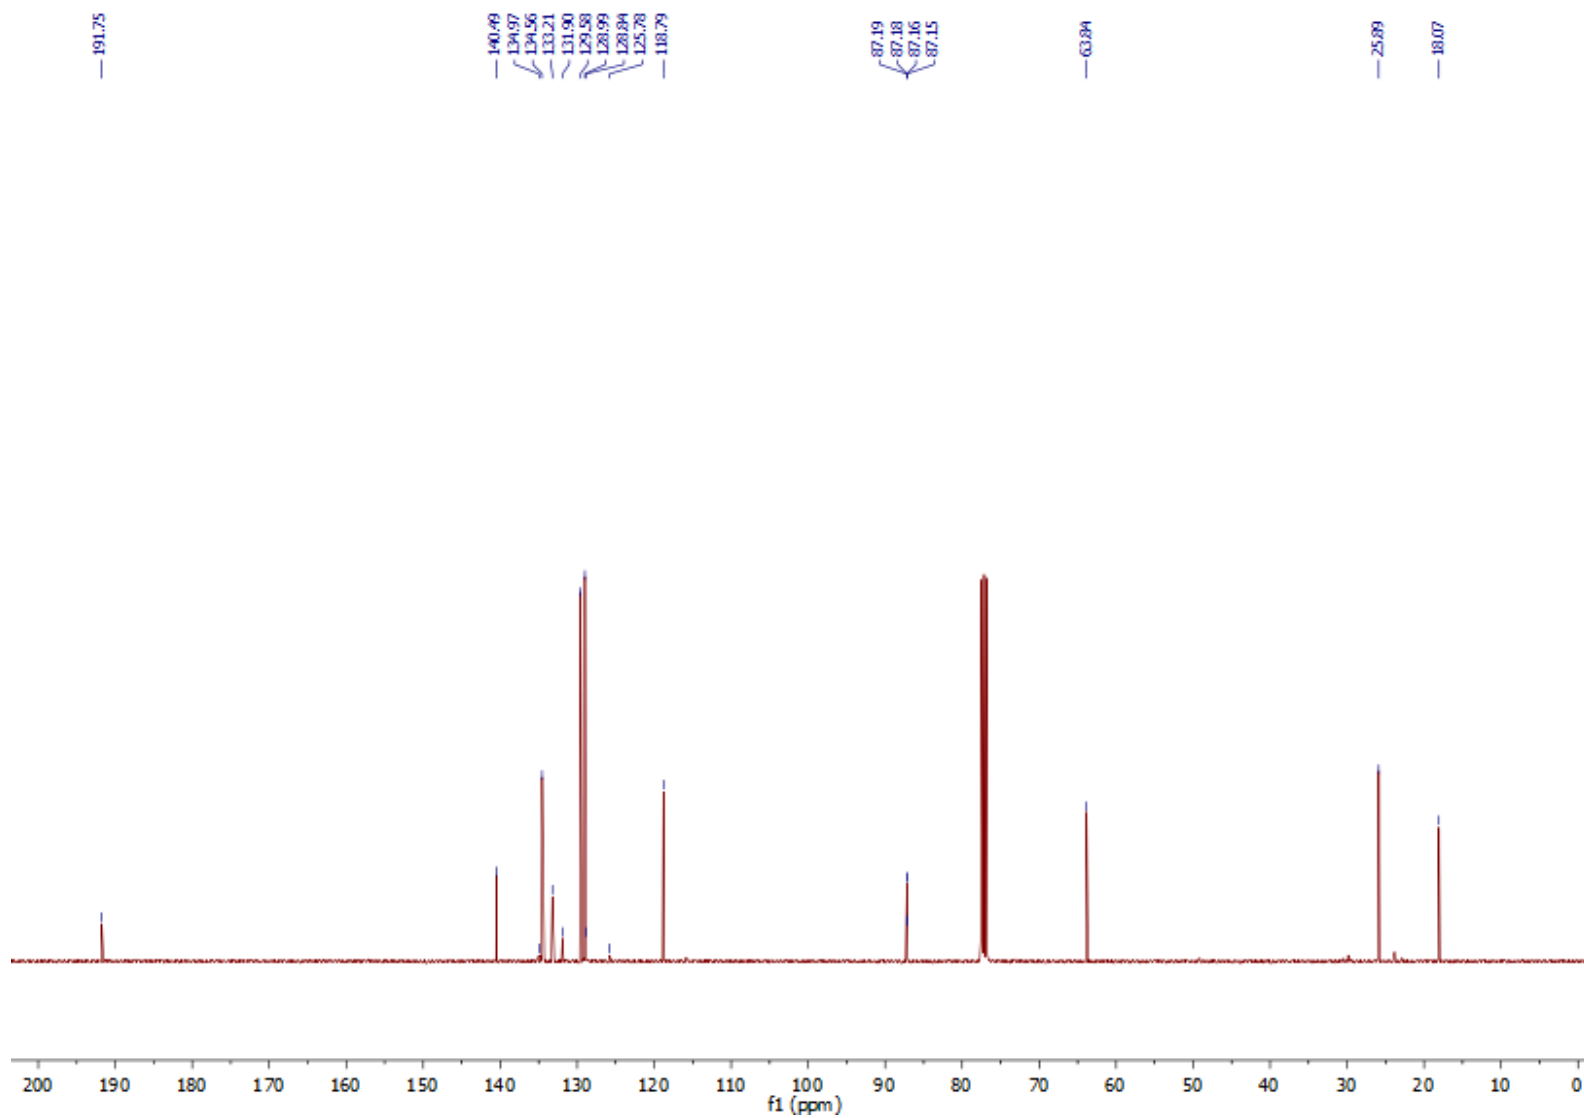

$^{19}\text{F}$  NMR ( $\text{CDCl}_3$ , 377 MHz). 2-((3-Methylbut-2-en-1-yl)oxy)-1-phenyl-2-((trifluoromethyl)thio)ethan-1-one (**5i**)

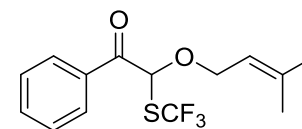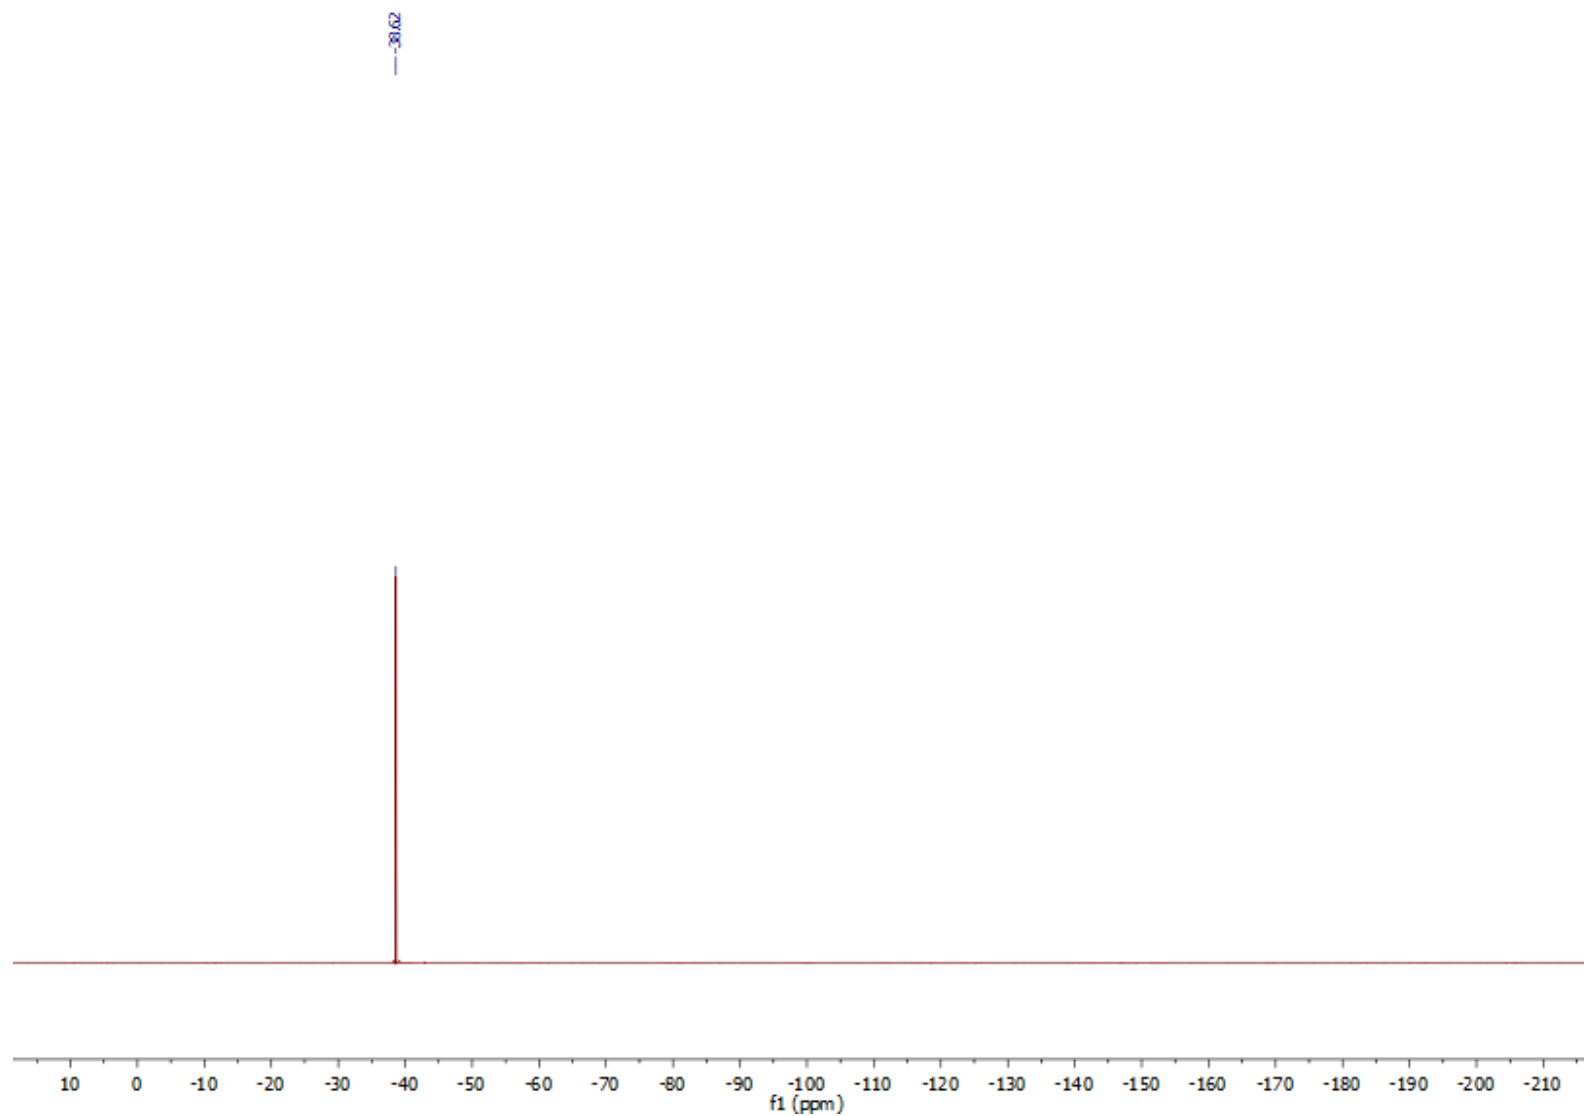

$^1\text{H}$  NMR ( $\text{CDCl}_3$ , 400 MHz). 2-((4-Bromobenzyl)oxy)-1-(*p*-tolyl)-2-((trifluoromethyl)thio)ethan-1-one (**5j**)

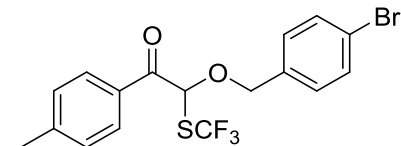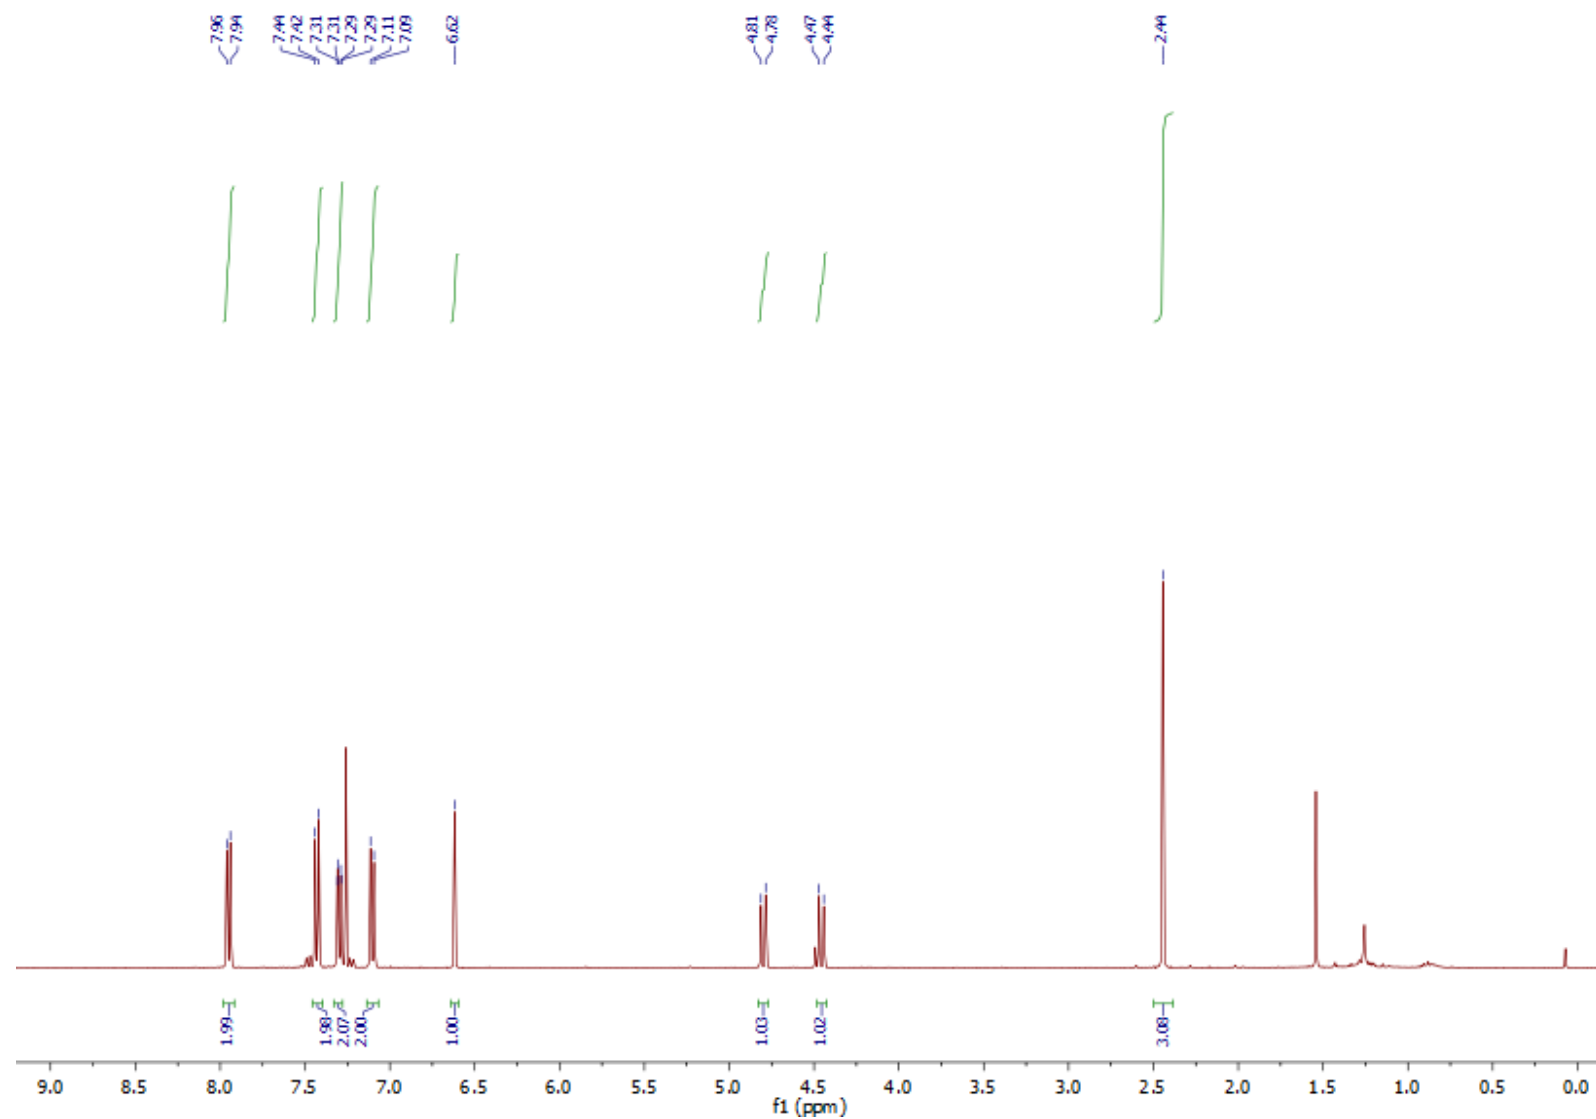

$^{13}\text{C}$  NMR ( $\text{CDCl}_3$ , 100 MHz). 2-((4-Bromobenzyl)oxy)-1-(*p*-tolyl)-2-((trifluoromethyl)thio)ethan-1-one (**5j**)

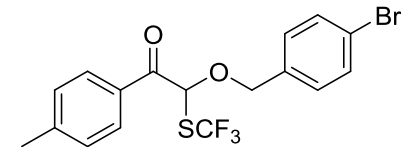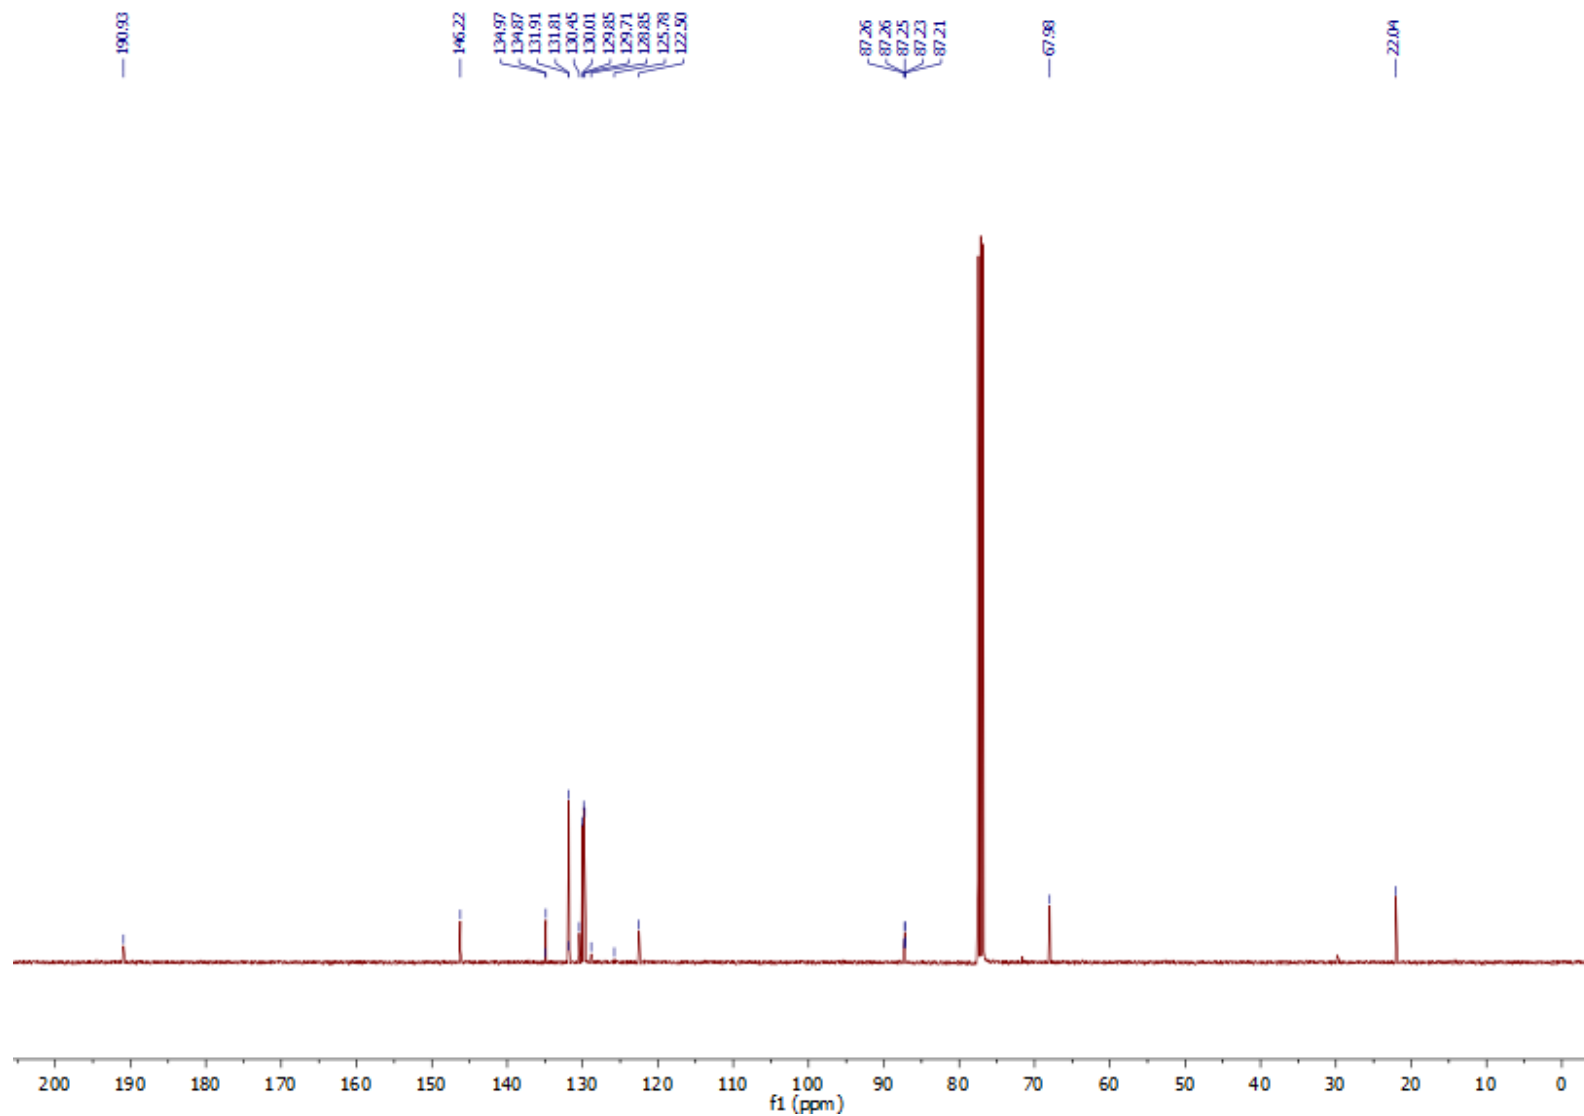

$^{19}\text{F}$  NMR ( $\text{CDCl}_3$ , 377 MHz). 2-((4-Bromobenzyl)oxy)-1-(*p*-tolyl)-2-((trifluoromethylthio)ethan-1-one (**5j**)

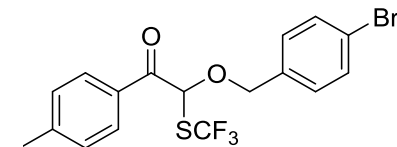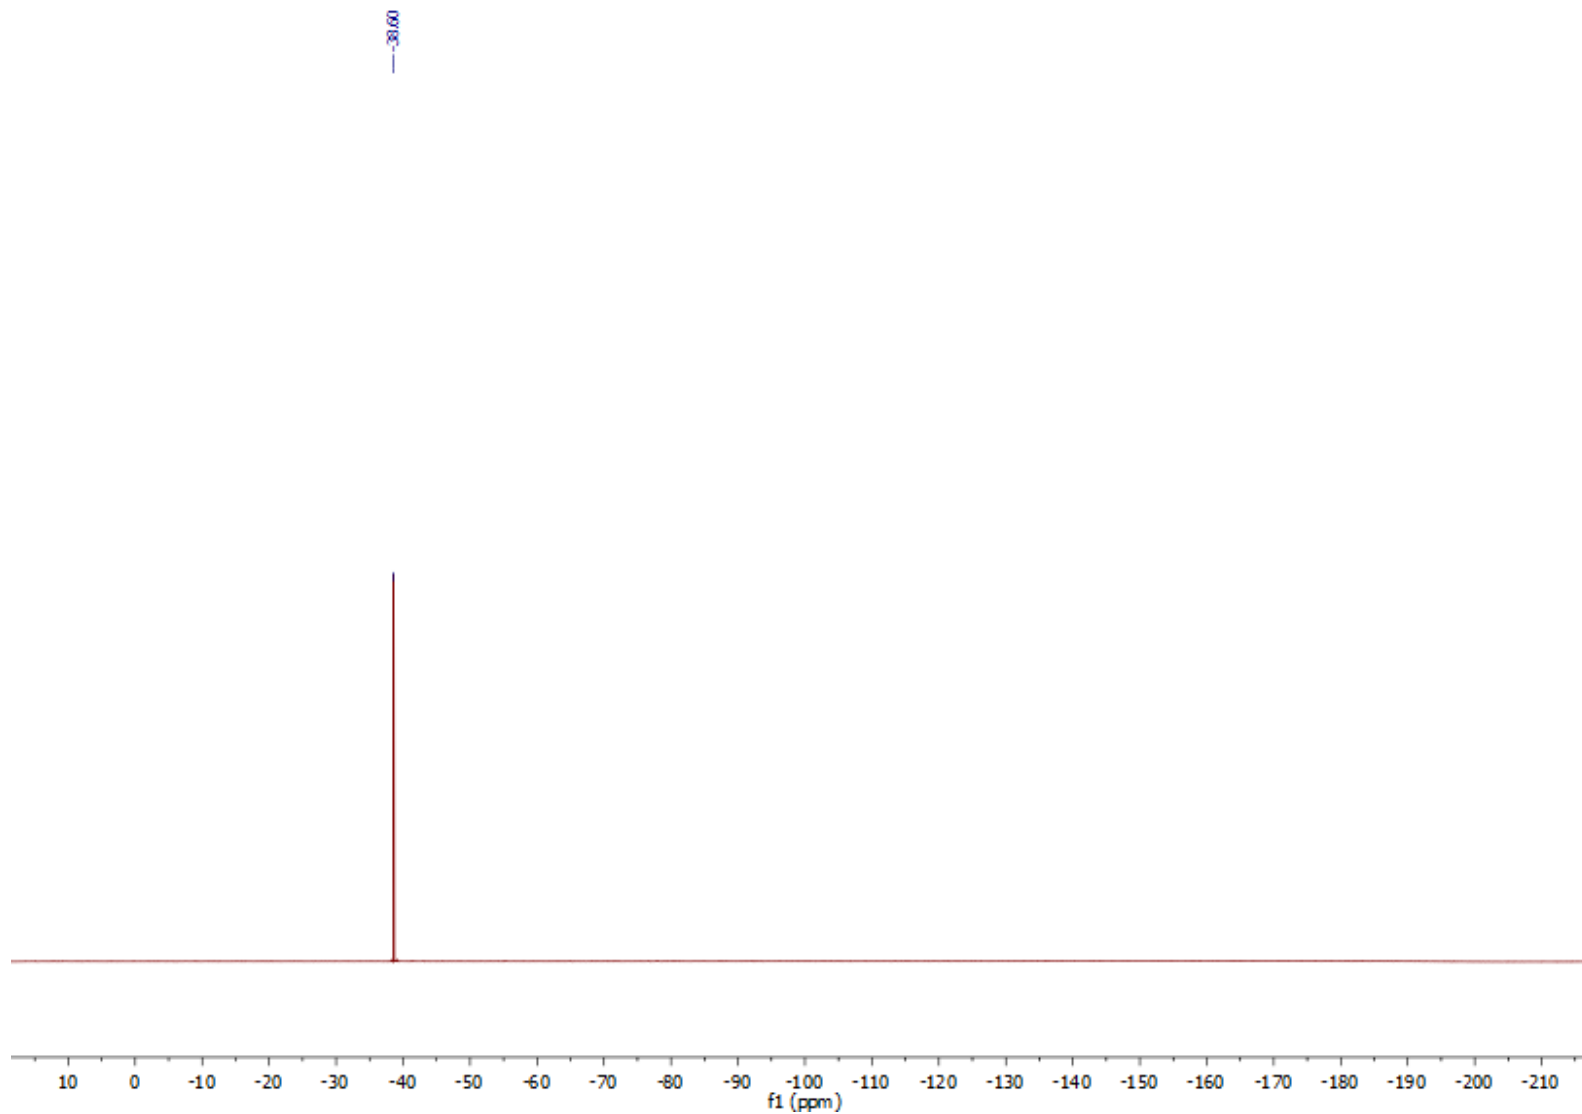

<sup>1</sup>H NMR (CDCl<sub>3</sub>, 400 MHz). 2-(Benzyloxy)-1-cyclopentyl-2-((trifluoromethyl)thio)ethan-1-one (5k)

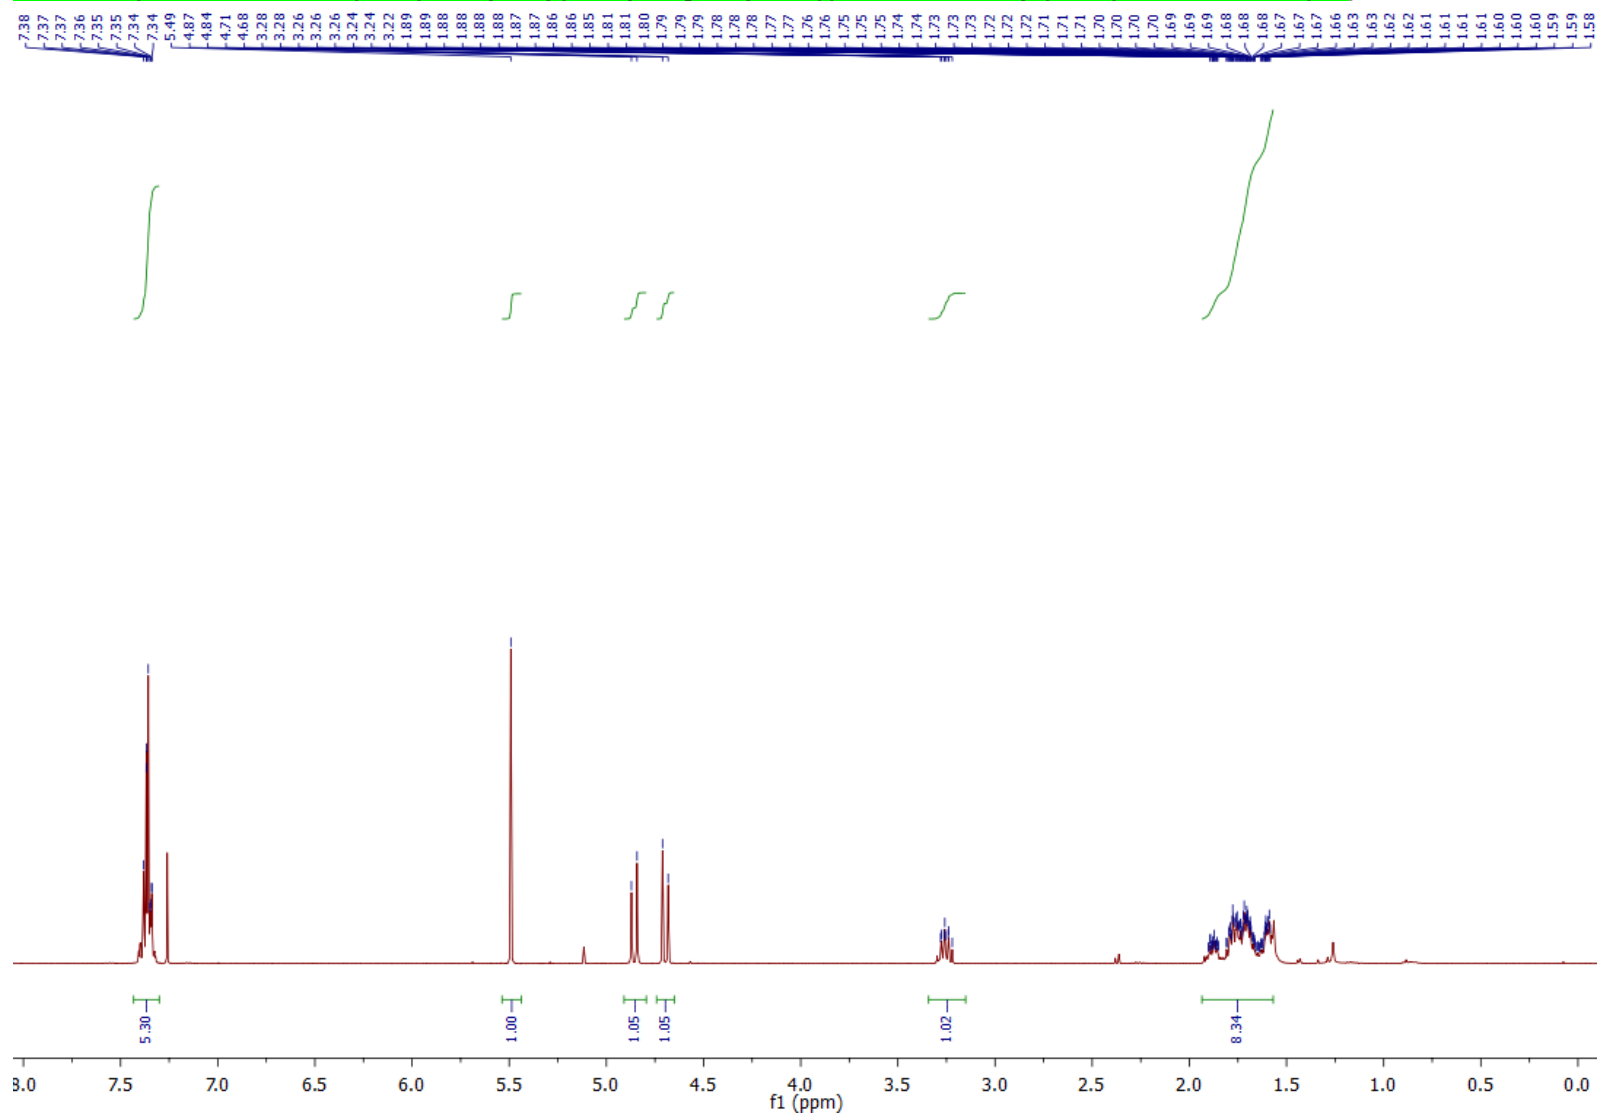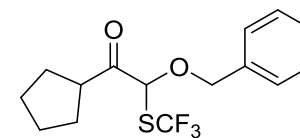

$^{13}\text{C}$  NMR ( $\text{CDCl}_3$ , 100 MHz). 2-(Benzyloxy)-1-cyclopentyl-2-((trifluoromethyl)thio)ethan-1-one (**5k**)

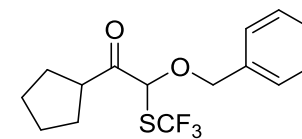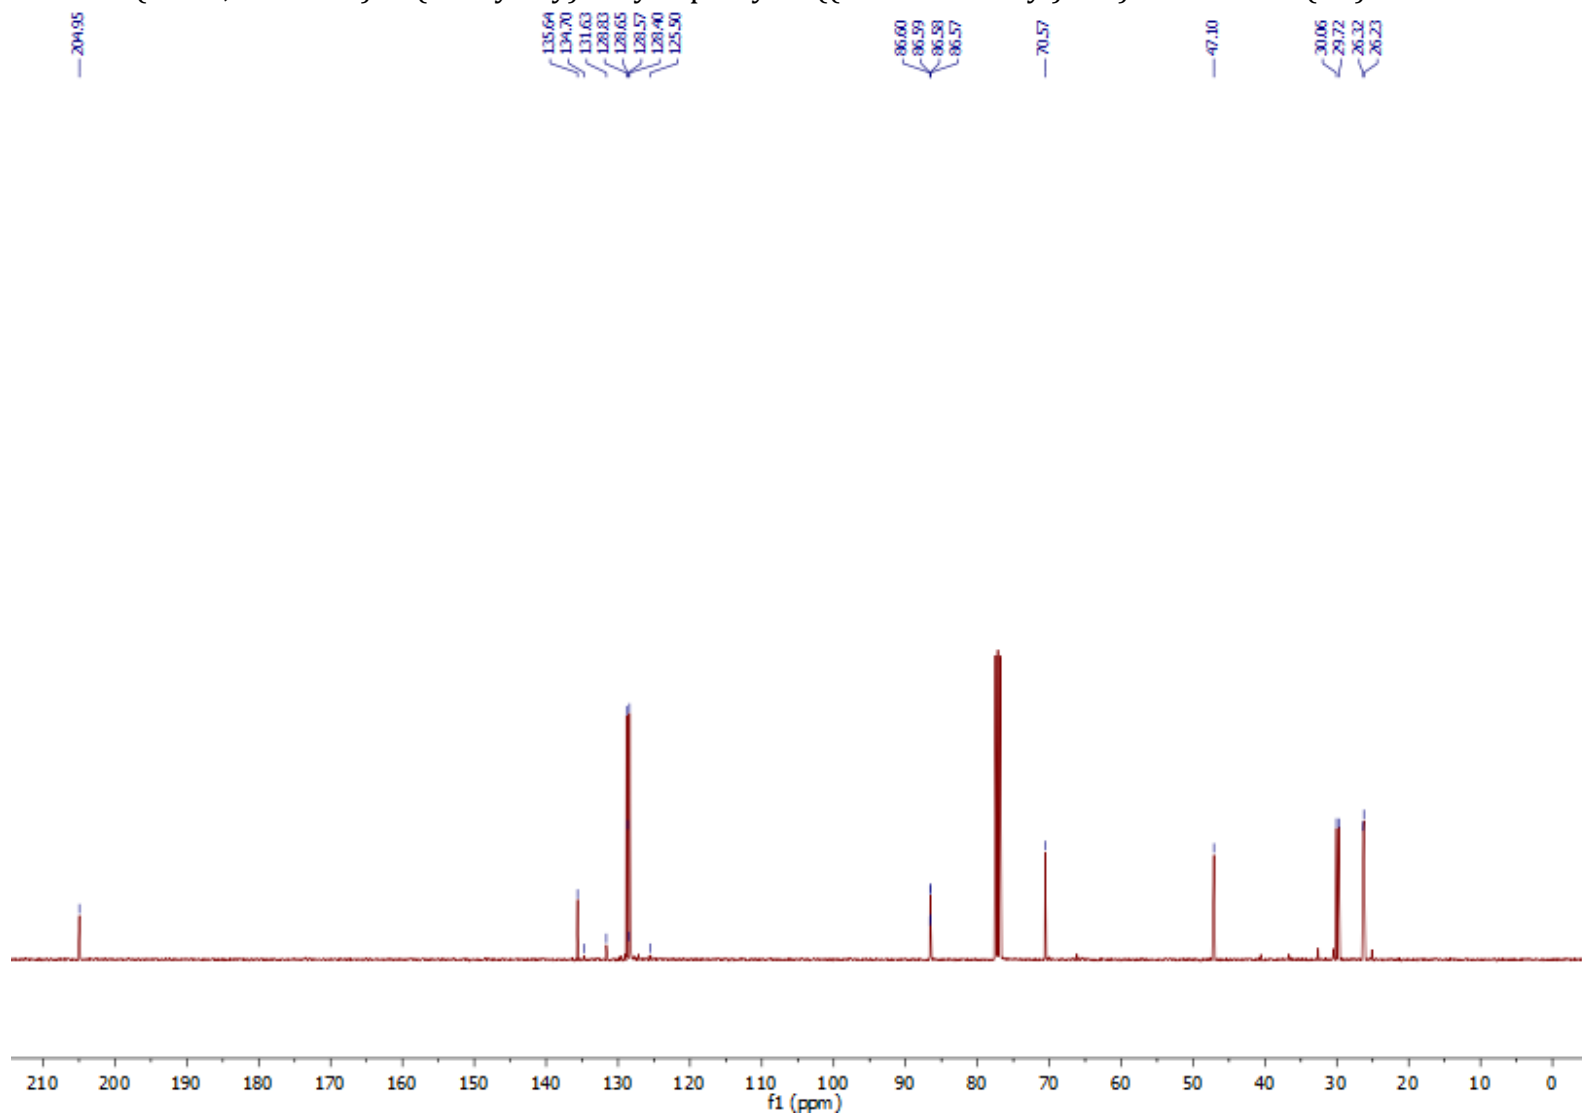



$^{19}\text{F}$  NMR ( $\text{CDCl}_3$ , 377 MHz). 2-(Benzyloxy)-1-cyclopentyl-2-((trifluoromethyl)thio)ethan-1-one (**5k**)

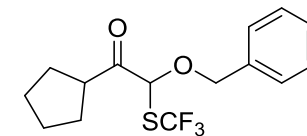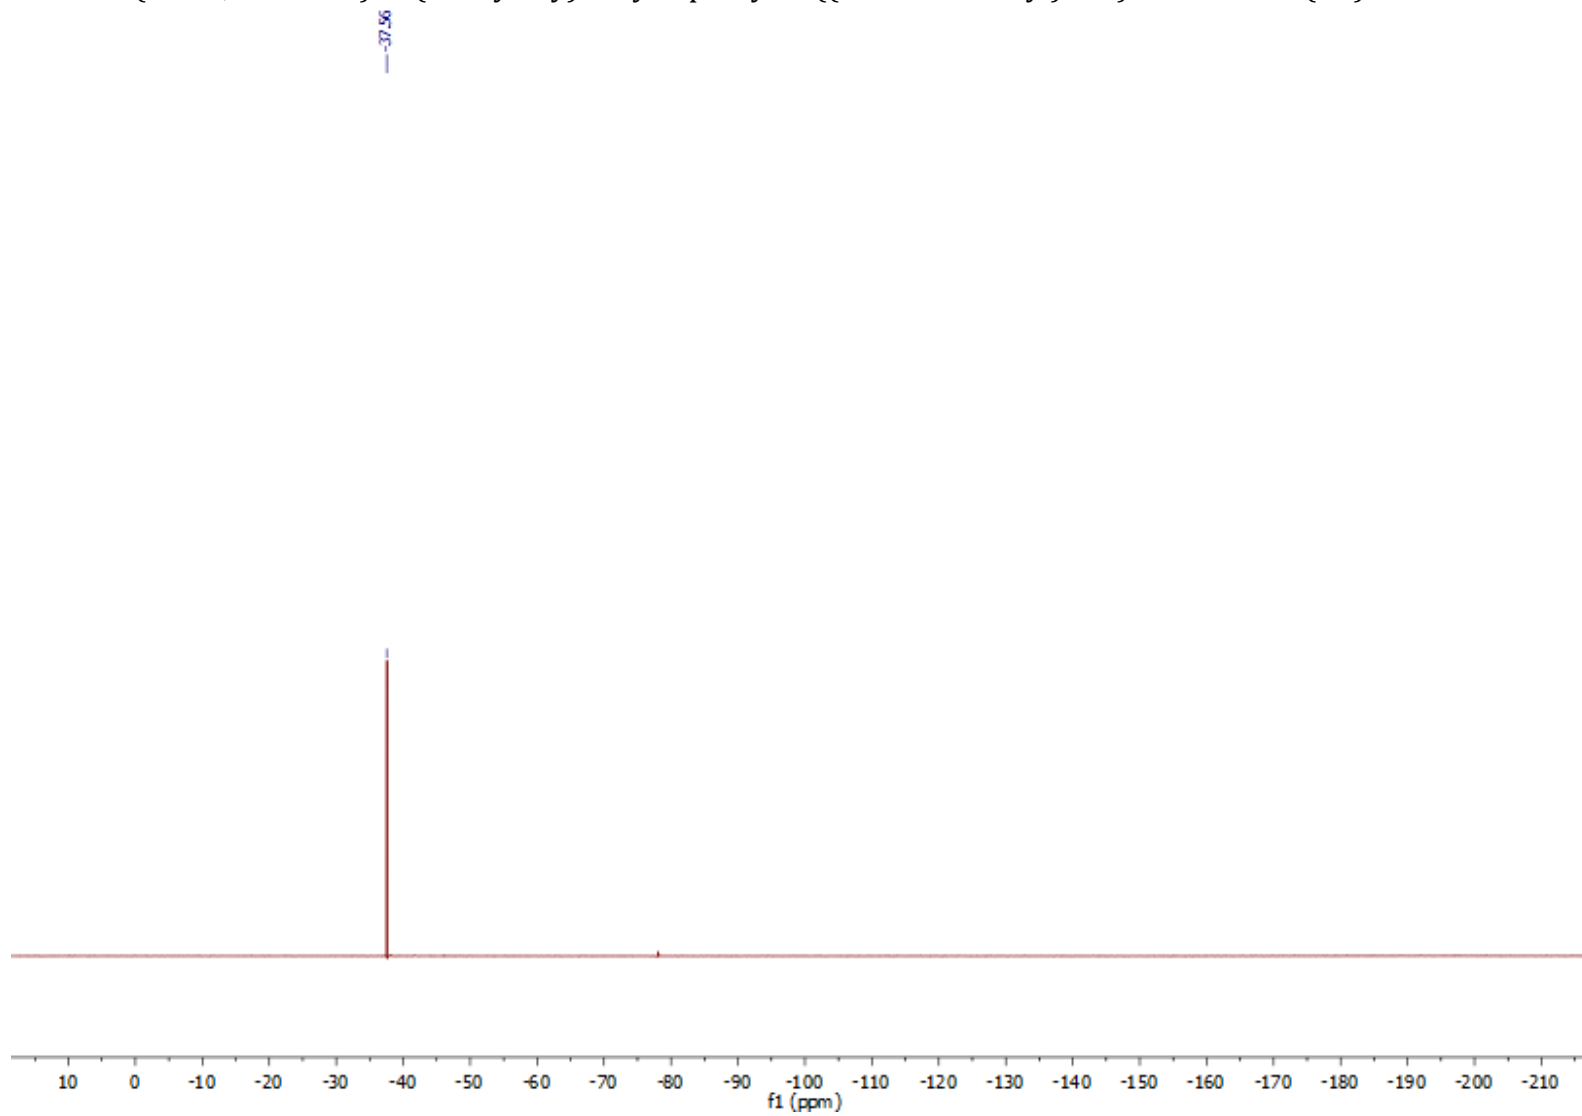

$^1\text{H}$  NMR ( $\text{CDCl}_3$ , 400 MHz). 1-(Benzyloxy)-1-((trifluoromethyl)thio)undecan-2-one (**51**)

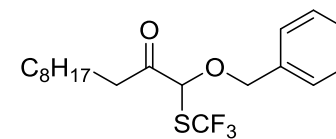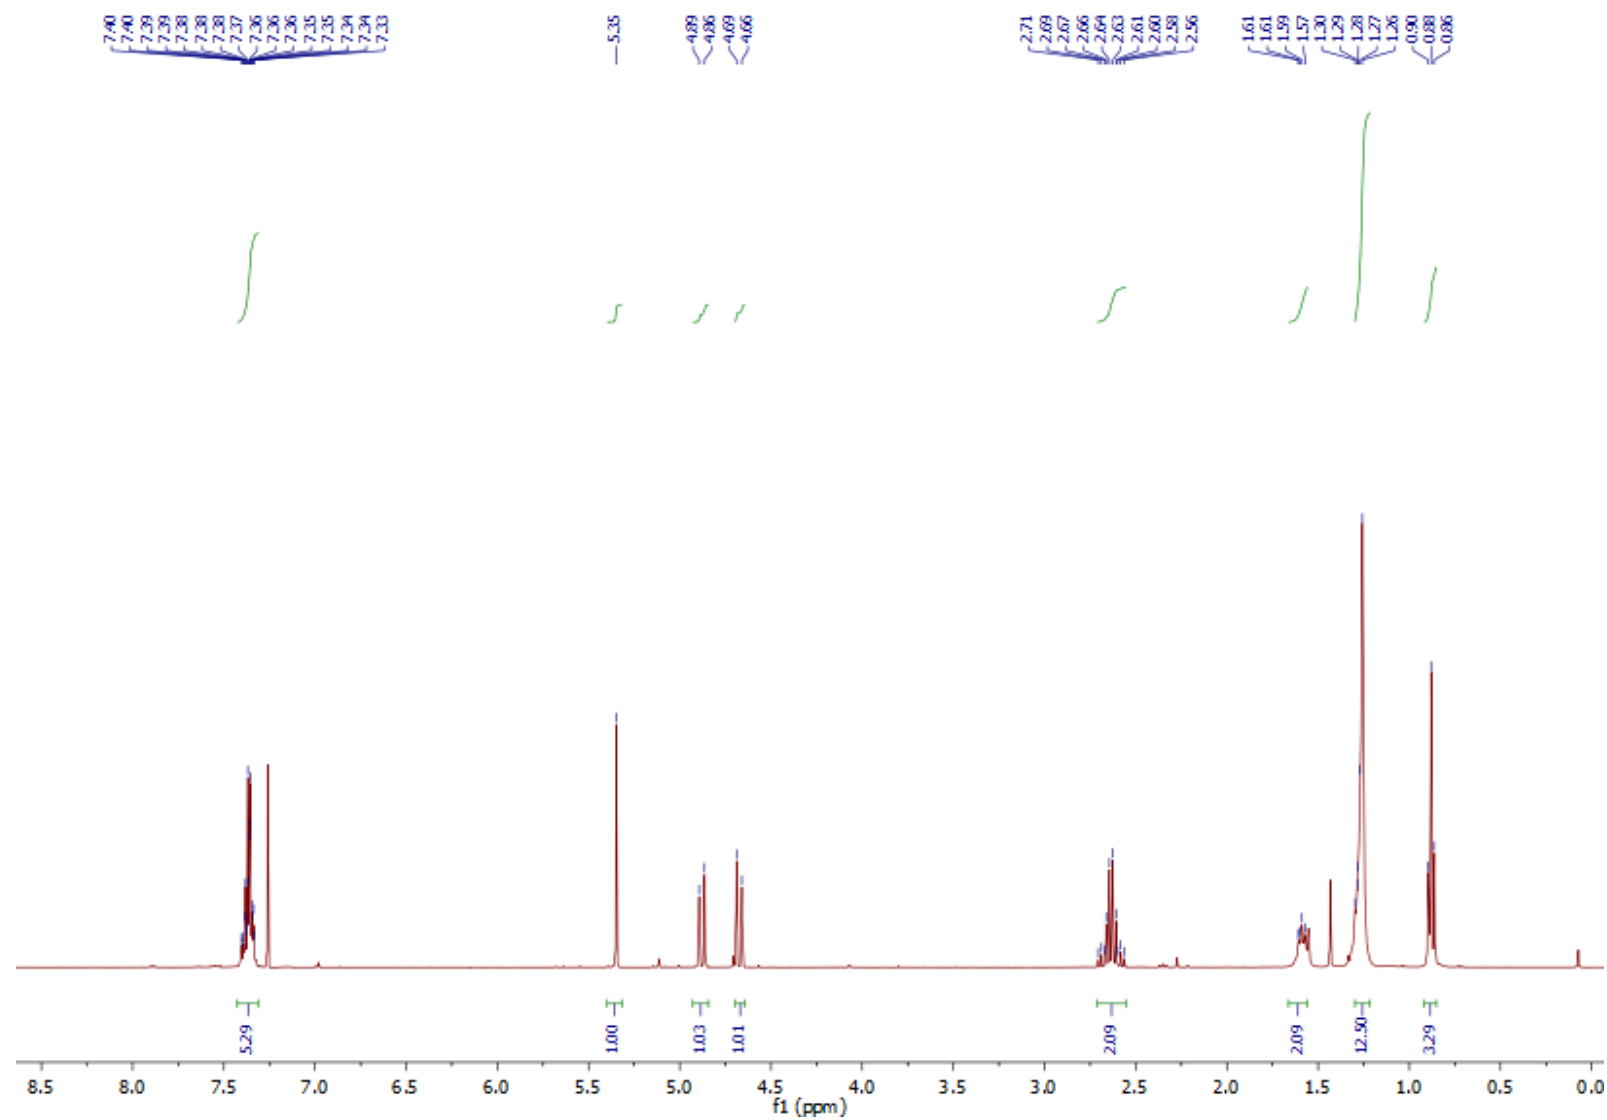

$^{13}\text{C}$  NMR ( $\text{CDCl}_3$ , 100 MHz). 1-(Benzyloxy)-1-((trifluoromethyl)thio)undecan-2-one (**51**)

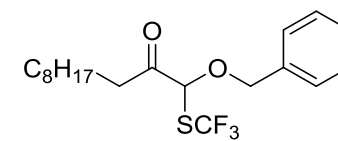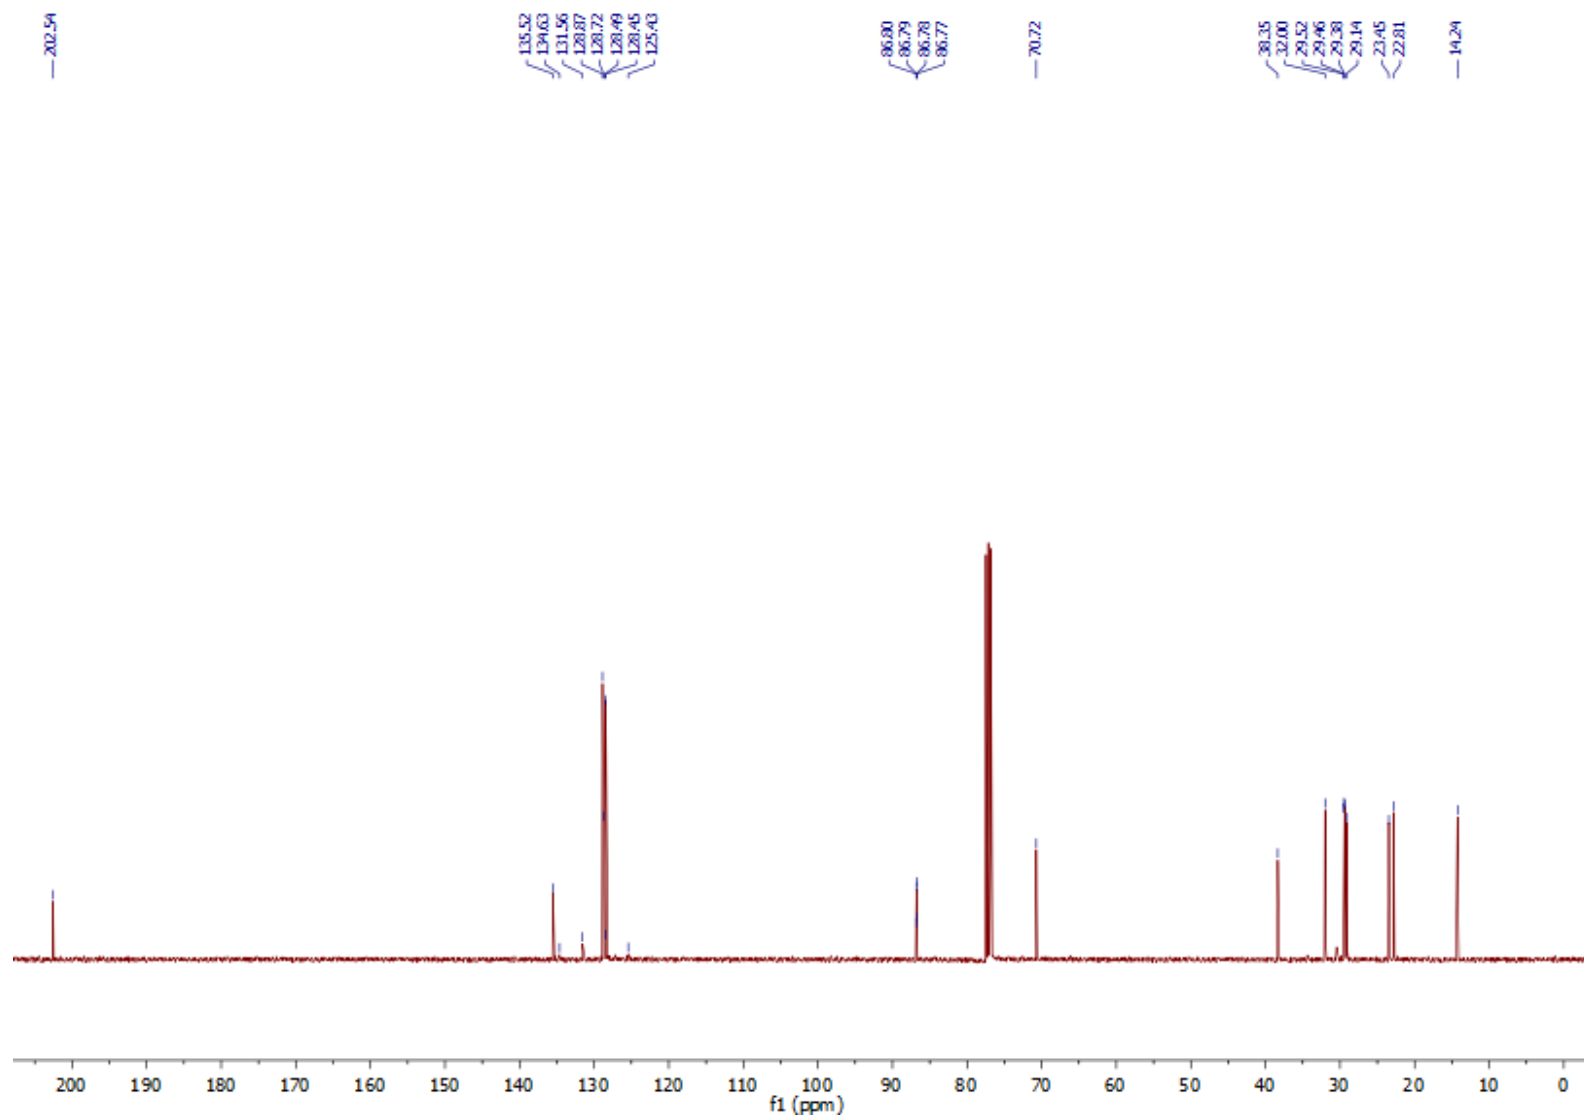

$^{19}\text{F}$  NMR ( $\text{CDCl}_3$ , 377 MHz). 1-(Benzyloxy)-1-((trifluoromethyl)thio)undecan-2-one (**51**)

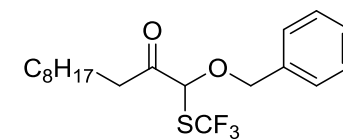

-37.35

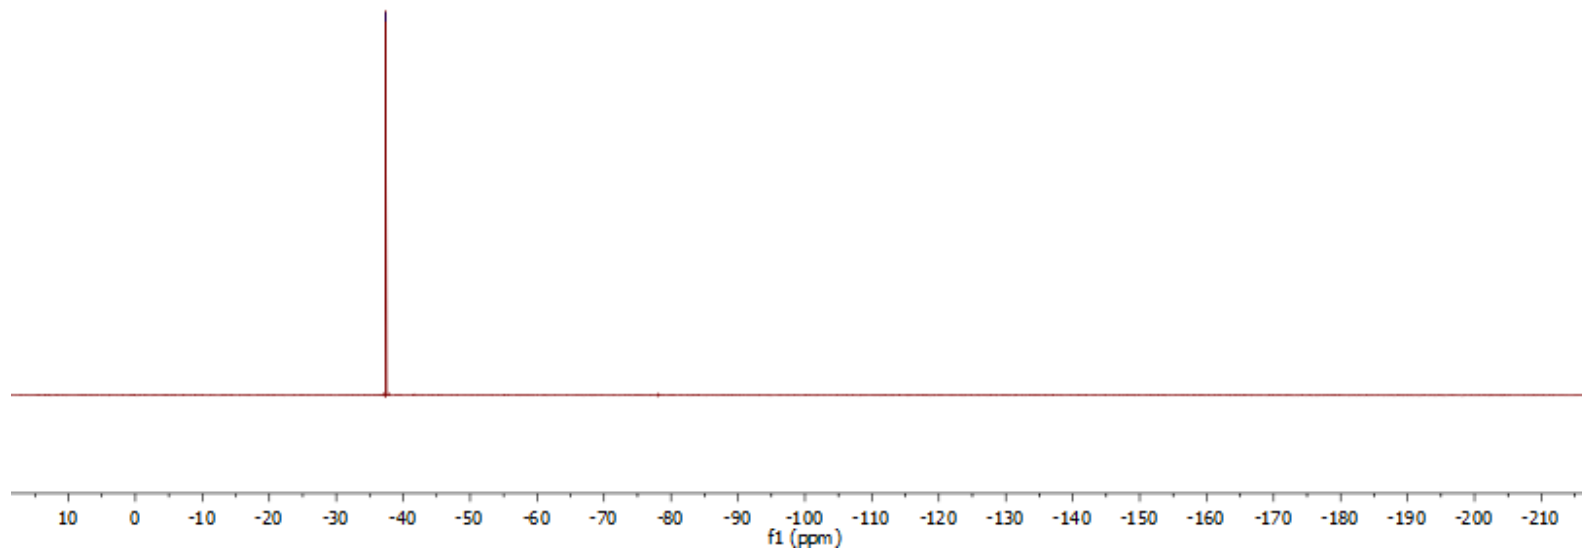

$^1\text{H}$  NMR ( $\text{CDCl}_3$ , 400 MHz). 1-(Hexyloxy)-1-((trifluoromethyl)thio)undecan-2-one (**5m**)

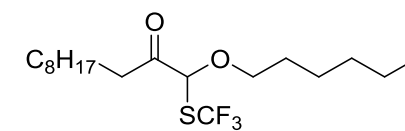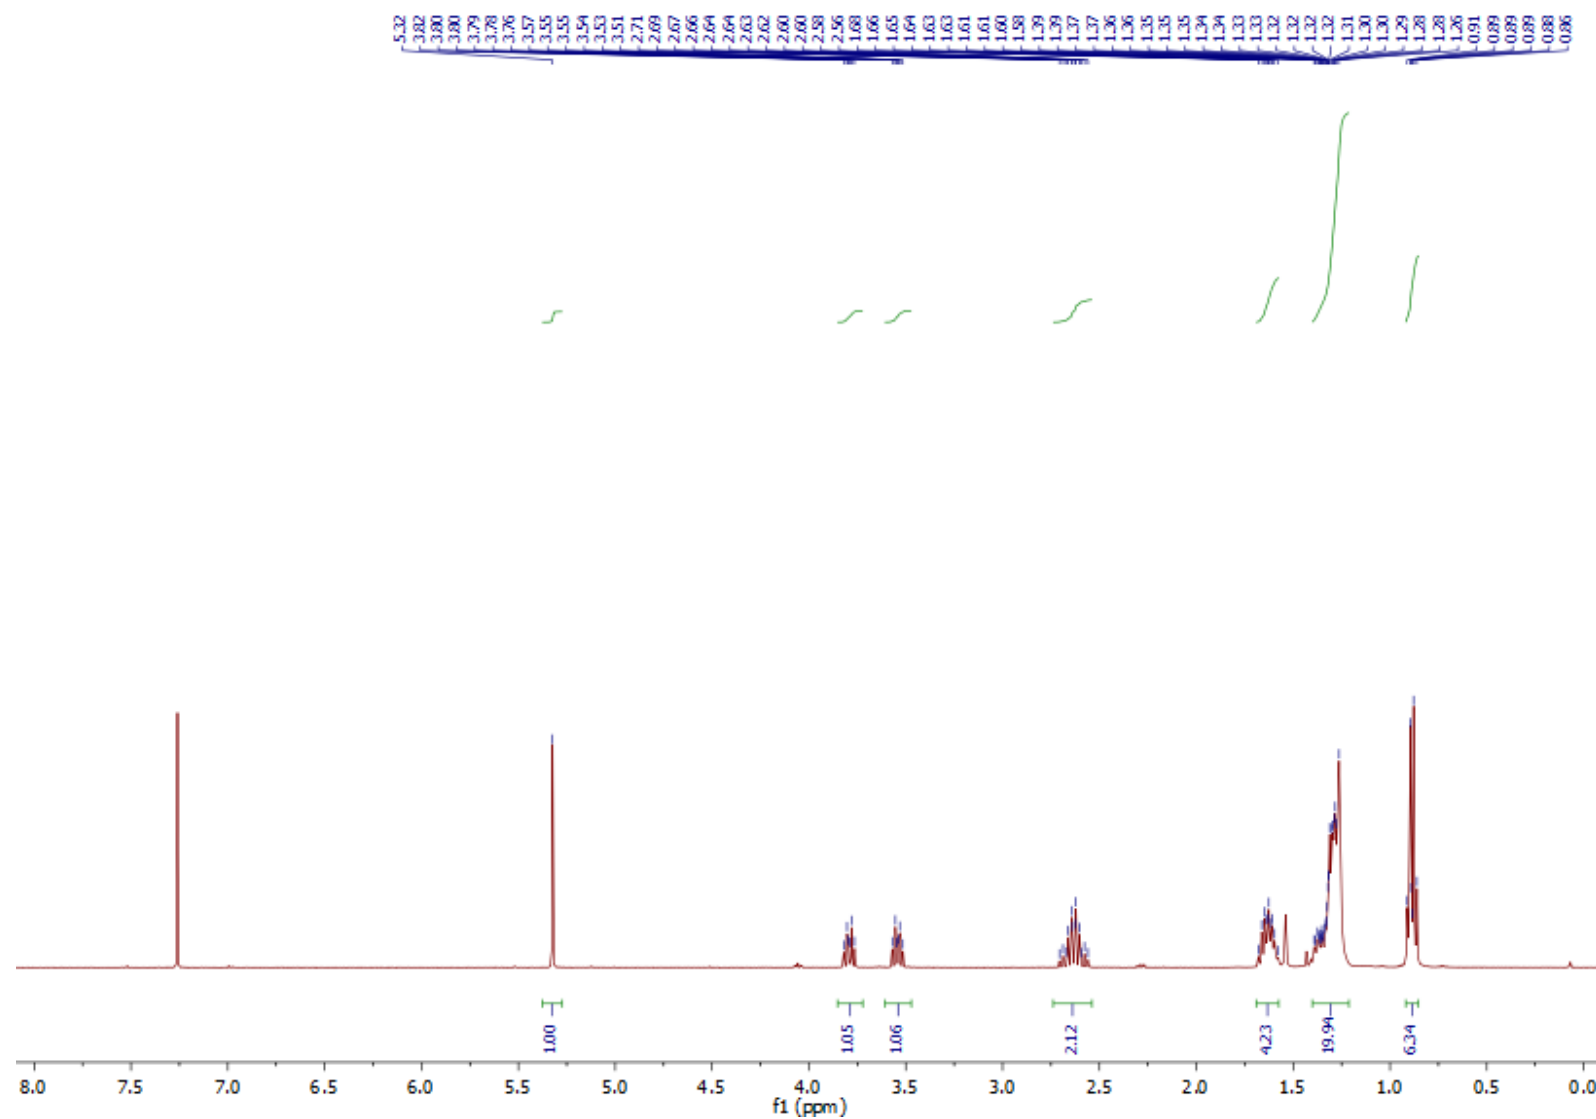

$^{13}\text{C}$  NMR ( $\text{CDCl}_3$ , 100 MHz). 1-(Hexyloxy)-1-((trifluoromethyl)thio)undecan-2-one (**5m**)

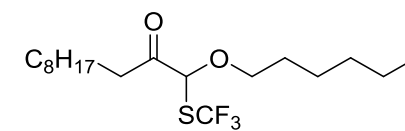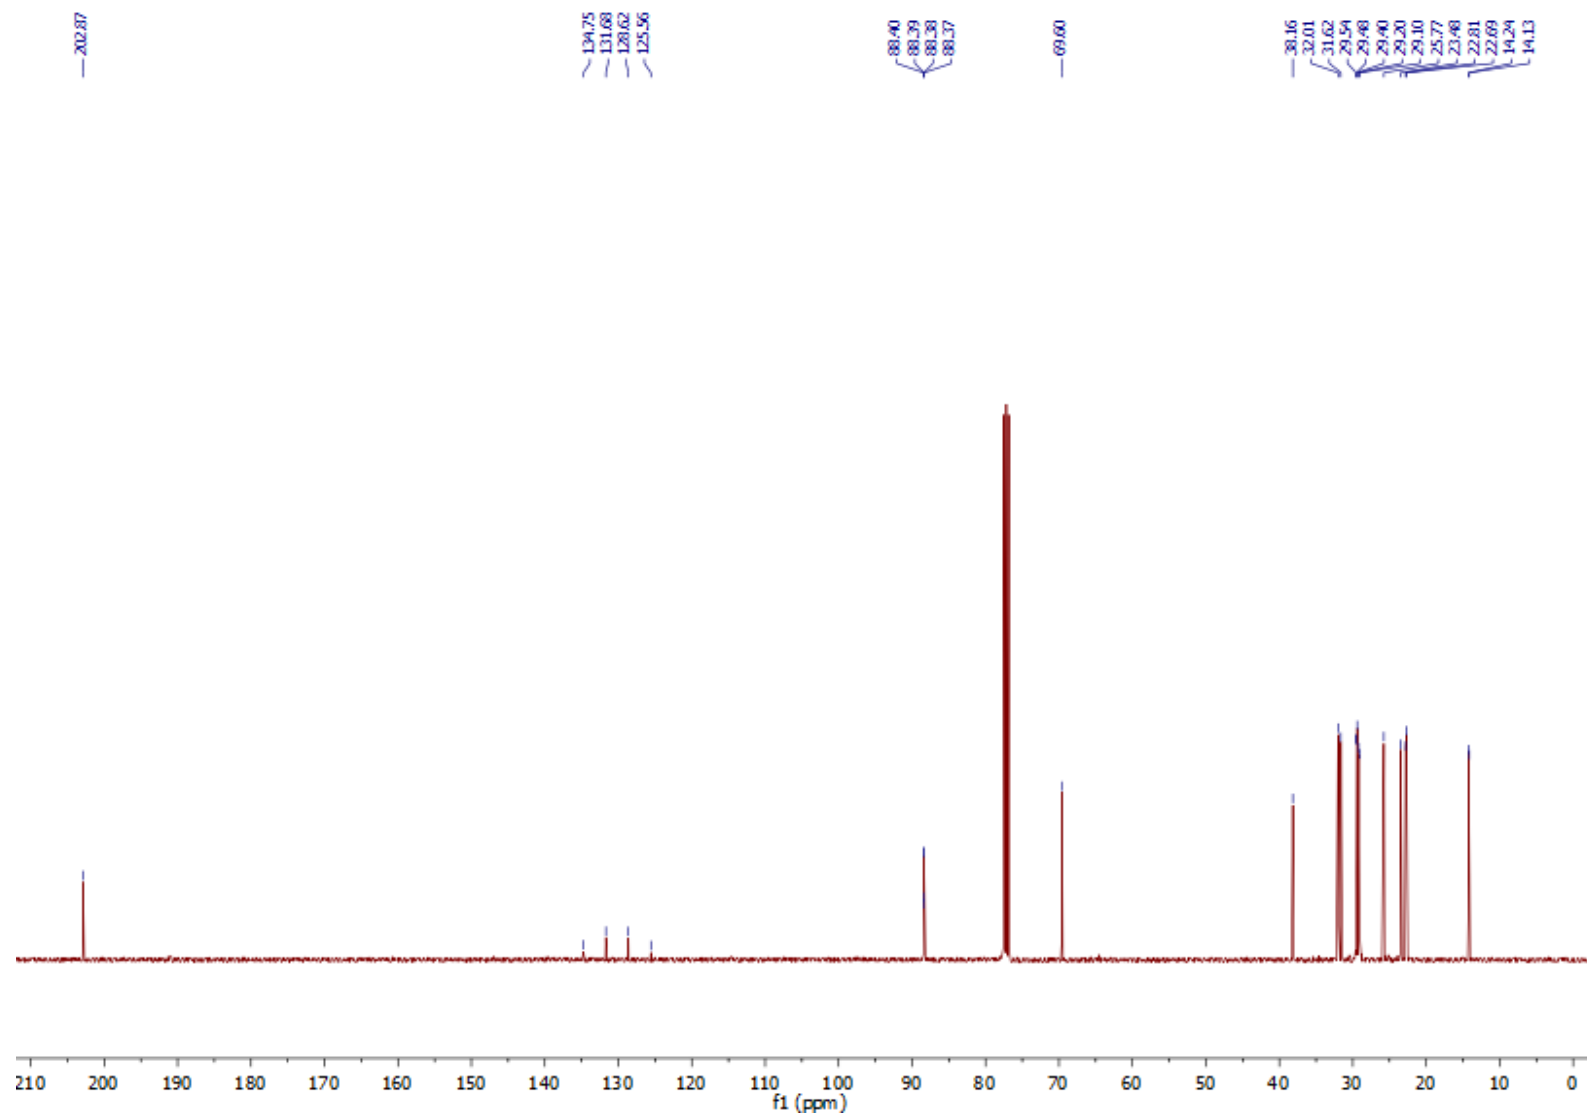

$^{19}\text{F}$  NMR ( $\text{CDCl}_3$ , 377 MHz). 1-(Hexyloxy)-1-((trifluoromethyl)thio)undecan-2-one (**5m**)

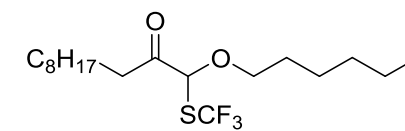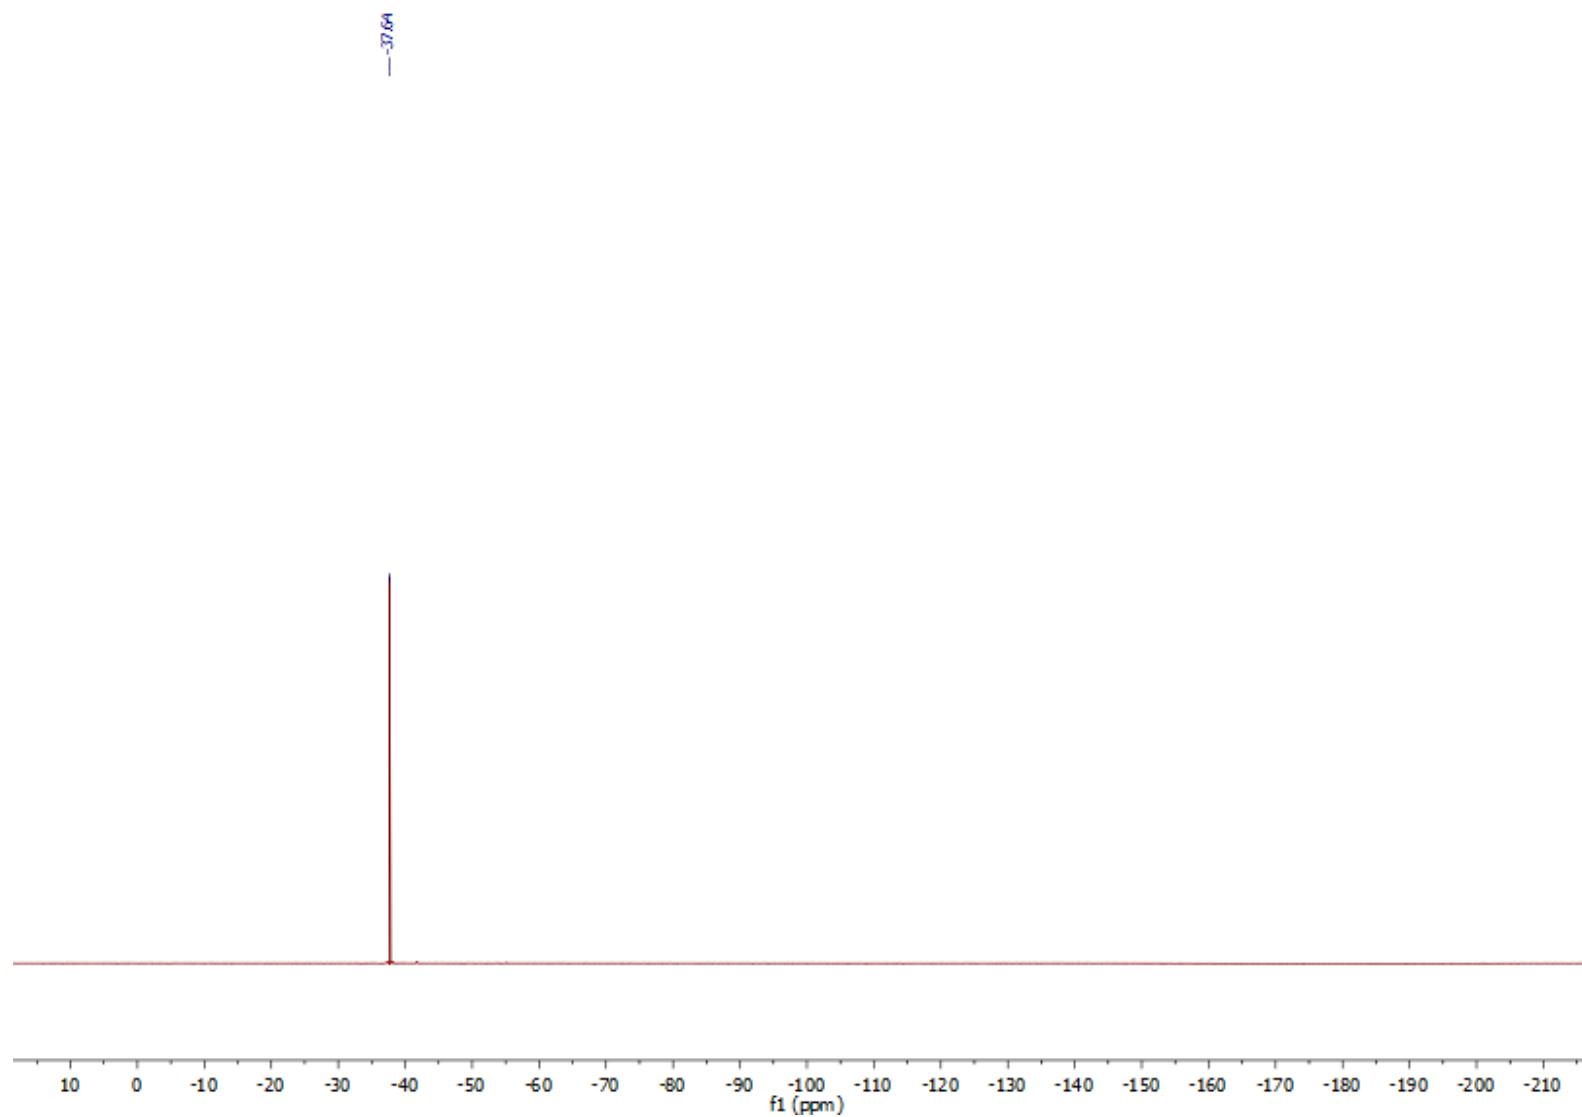

$^1\text{H}$  NMR ( $\text{CDCl}_3$ , 400 MHz). 2-(Benzyloxy)-2-((trifluoromethyl)thio)-2,3-dihydro-1*H*-inden-1-one (**5n**)

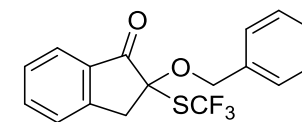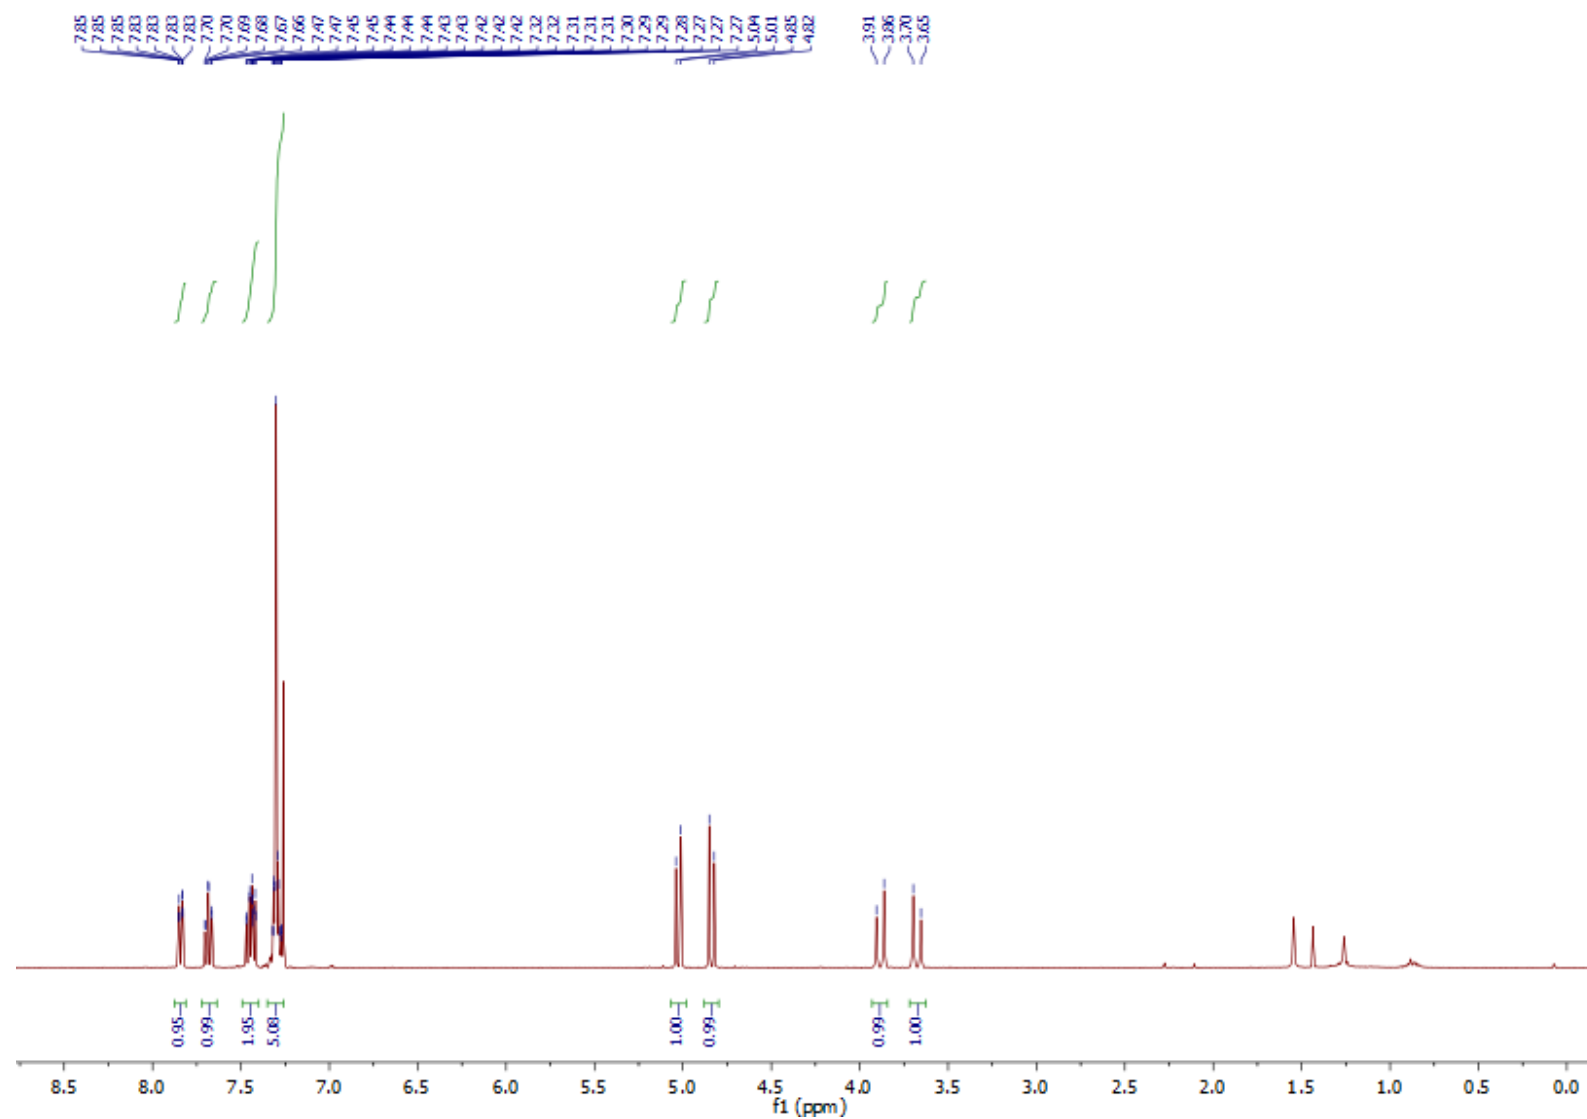



$^{13}\text{C}$  NMR ( $\text{CDCl}_3$ , 100 MHz). 2-(Benzyloxy)-2-((trifluoromethyl)thio)-2,3-dihydro-1*H*-inden-1-one (**5n**)

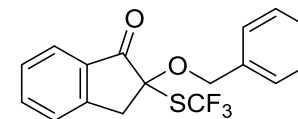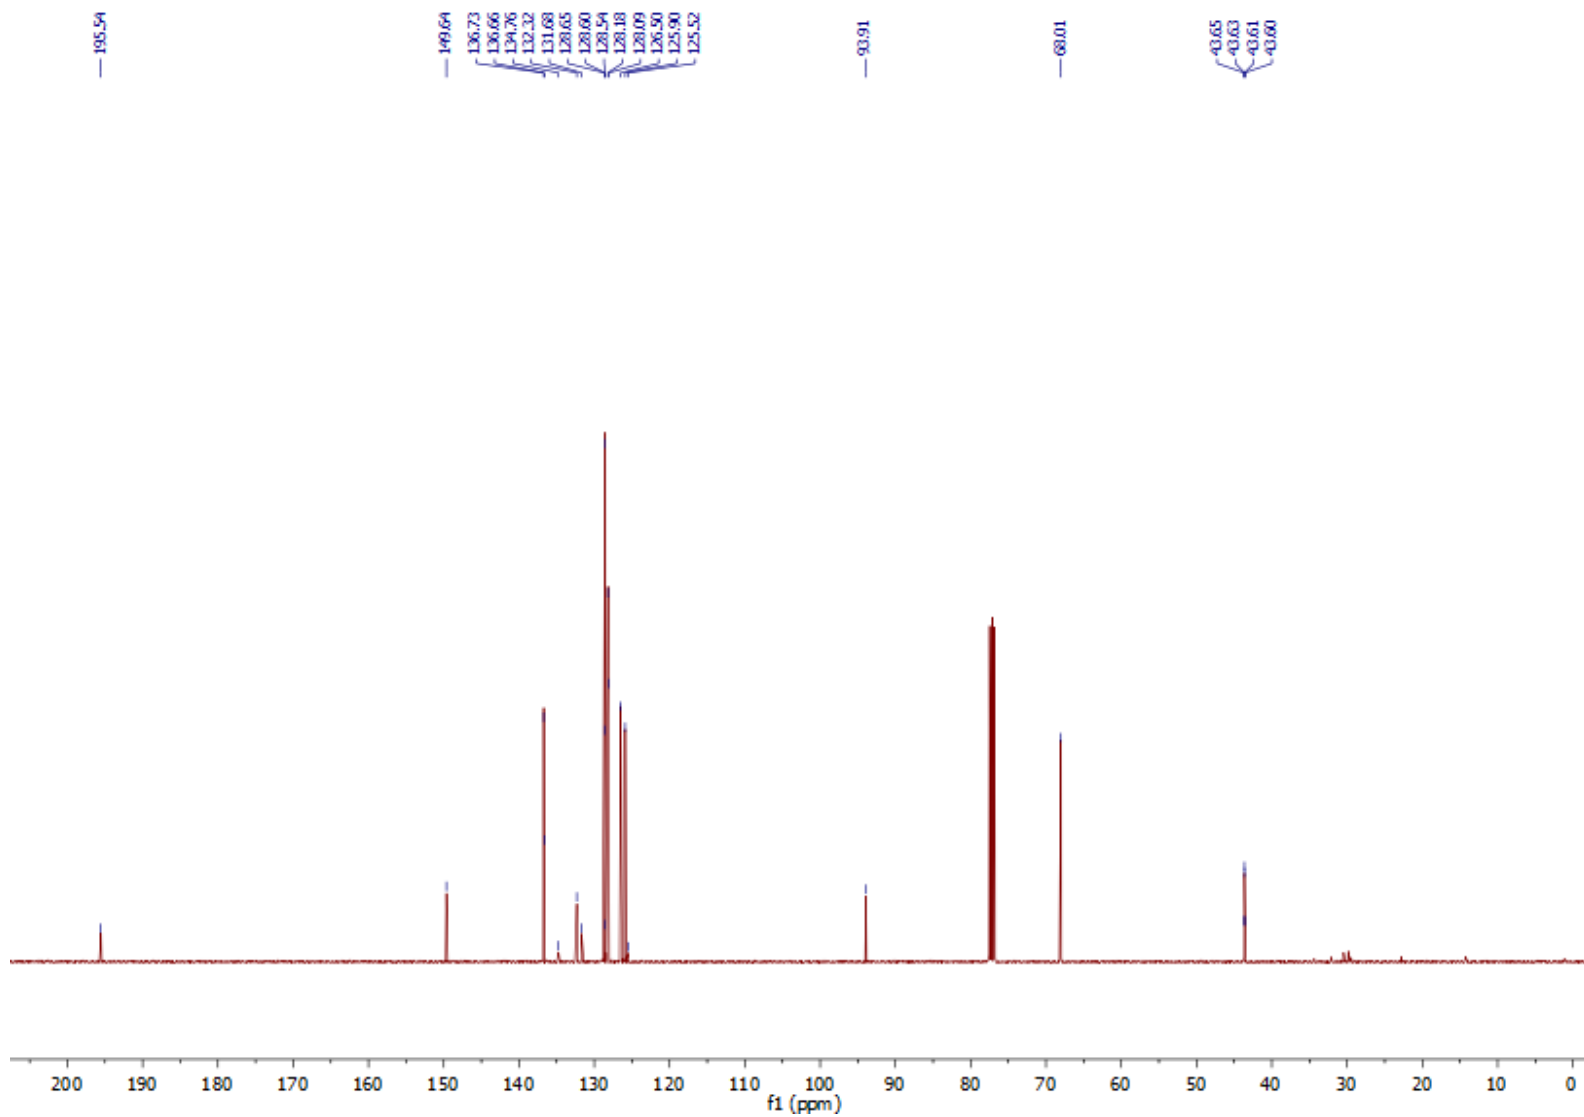

$^{19}\text{F}$  NMR ( $\text{CDCl}_3$ , 377 MHz). 2-(Benzyloxy)-2-((trifluoromethyl)thio)-2,3-dihydro-1*H*-inden-1-one (**5n**)

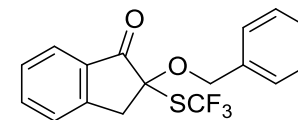

-36.33

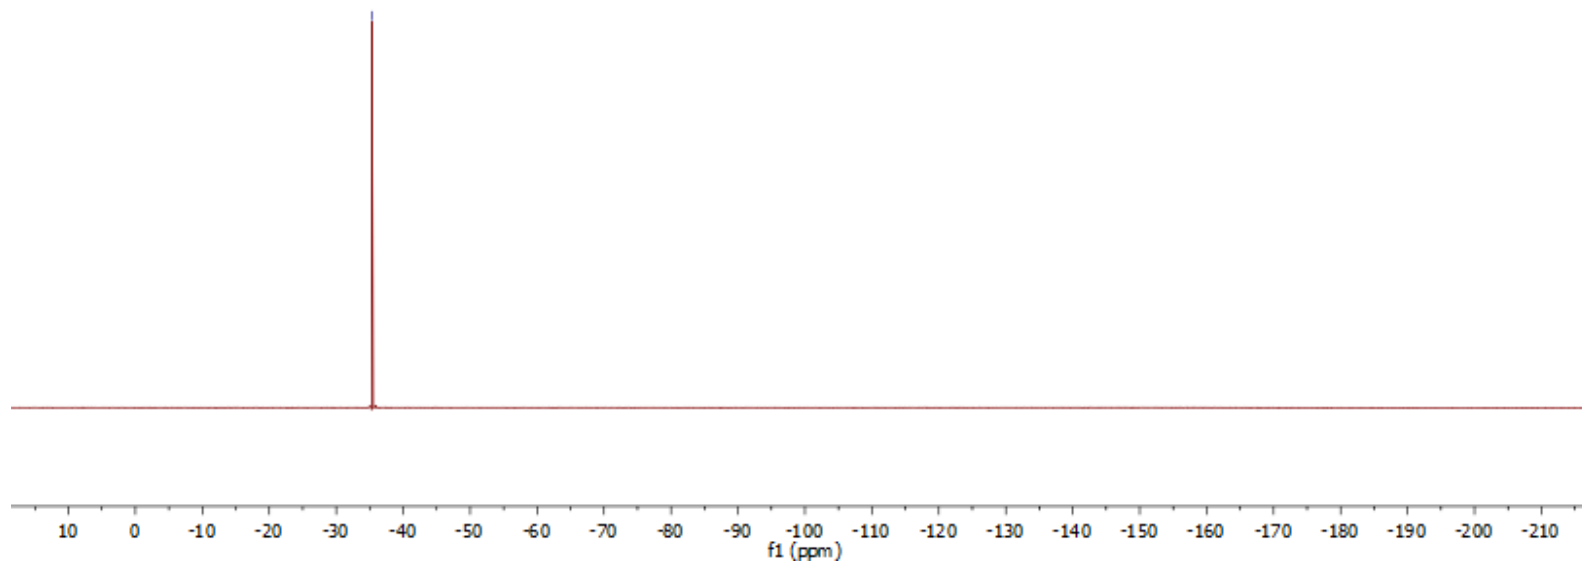

$^1\text{H}$  NMR ( $\text{CDCl}_3$ , 400 MHz). Ethyl 2-(benzyloxy)-2-((trifluoromethyl)thio)acetate (**5o**)

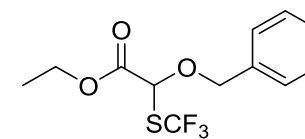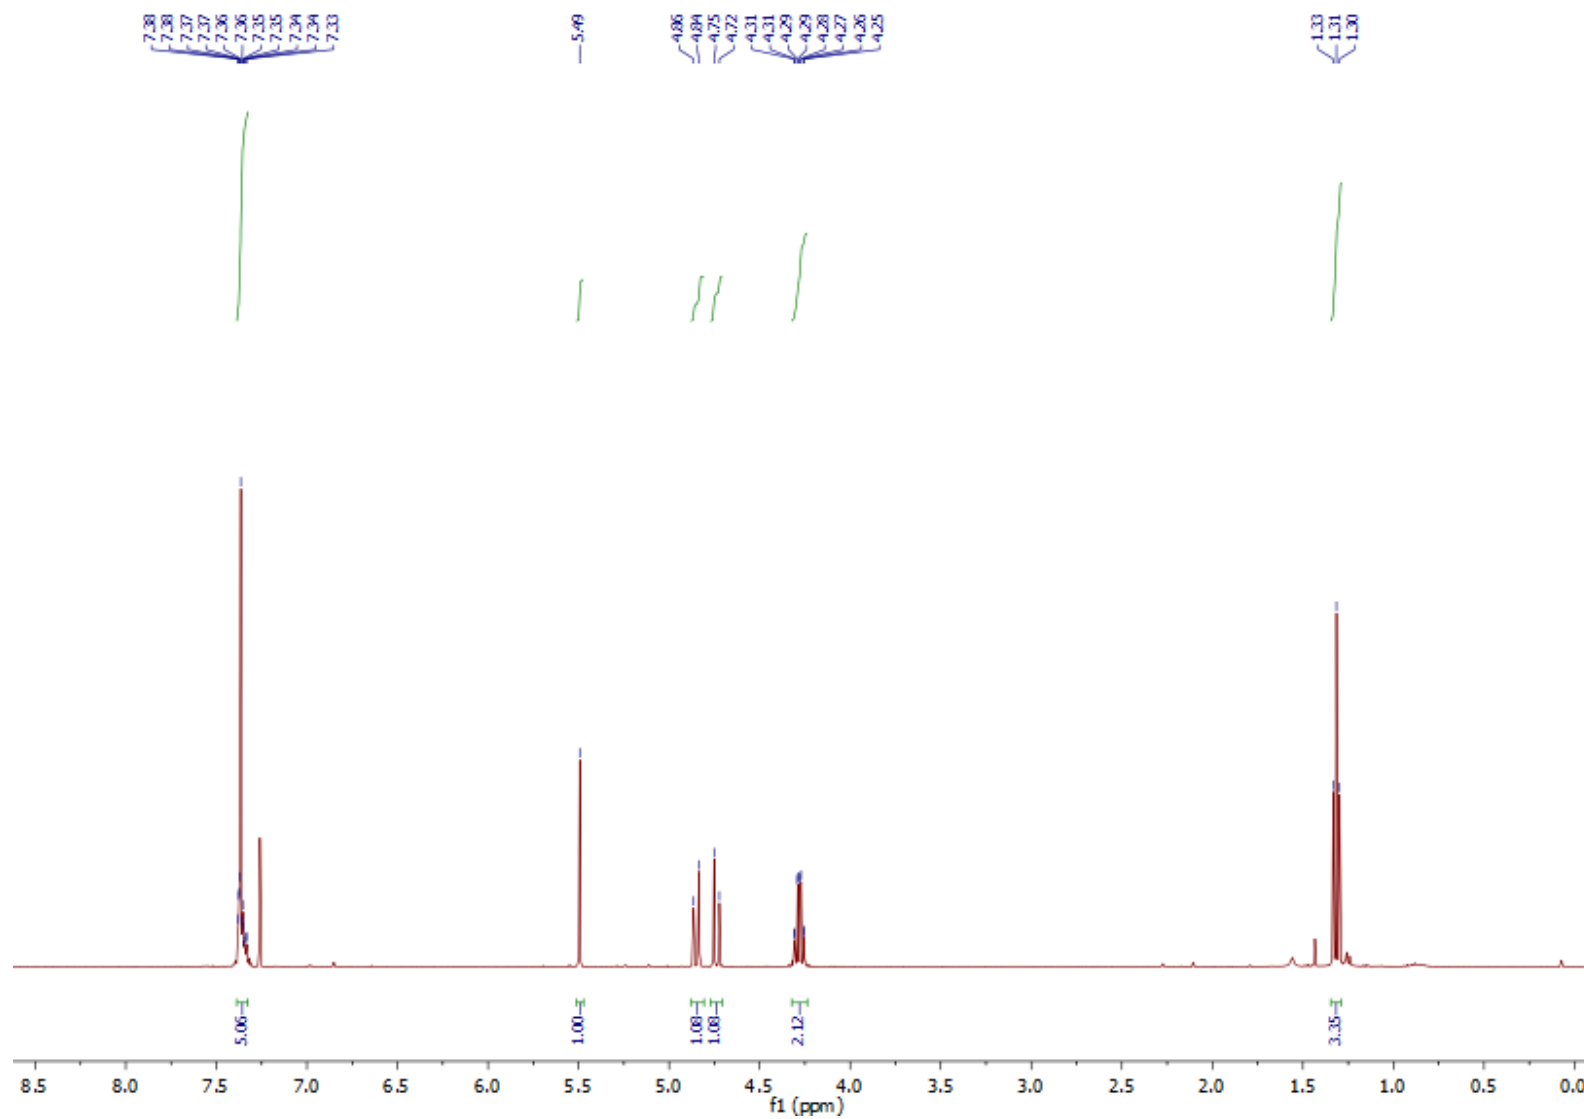

$^{13}\text{C}$  NMR ( $\text{CDCl}_3$ , 100 MHz). Ethyl 2-(benzyloxy)-2-((trifluoromethyl)thio)acetate (**5o**)

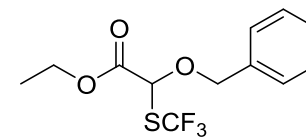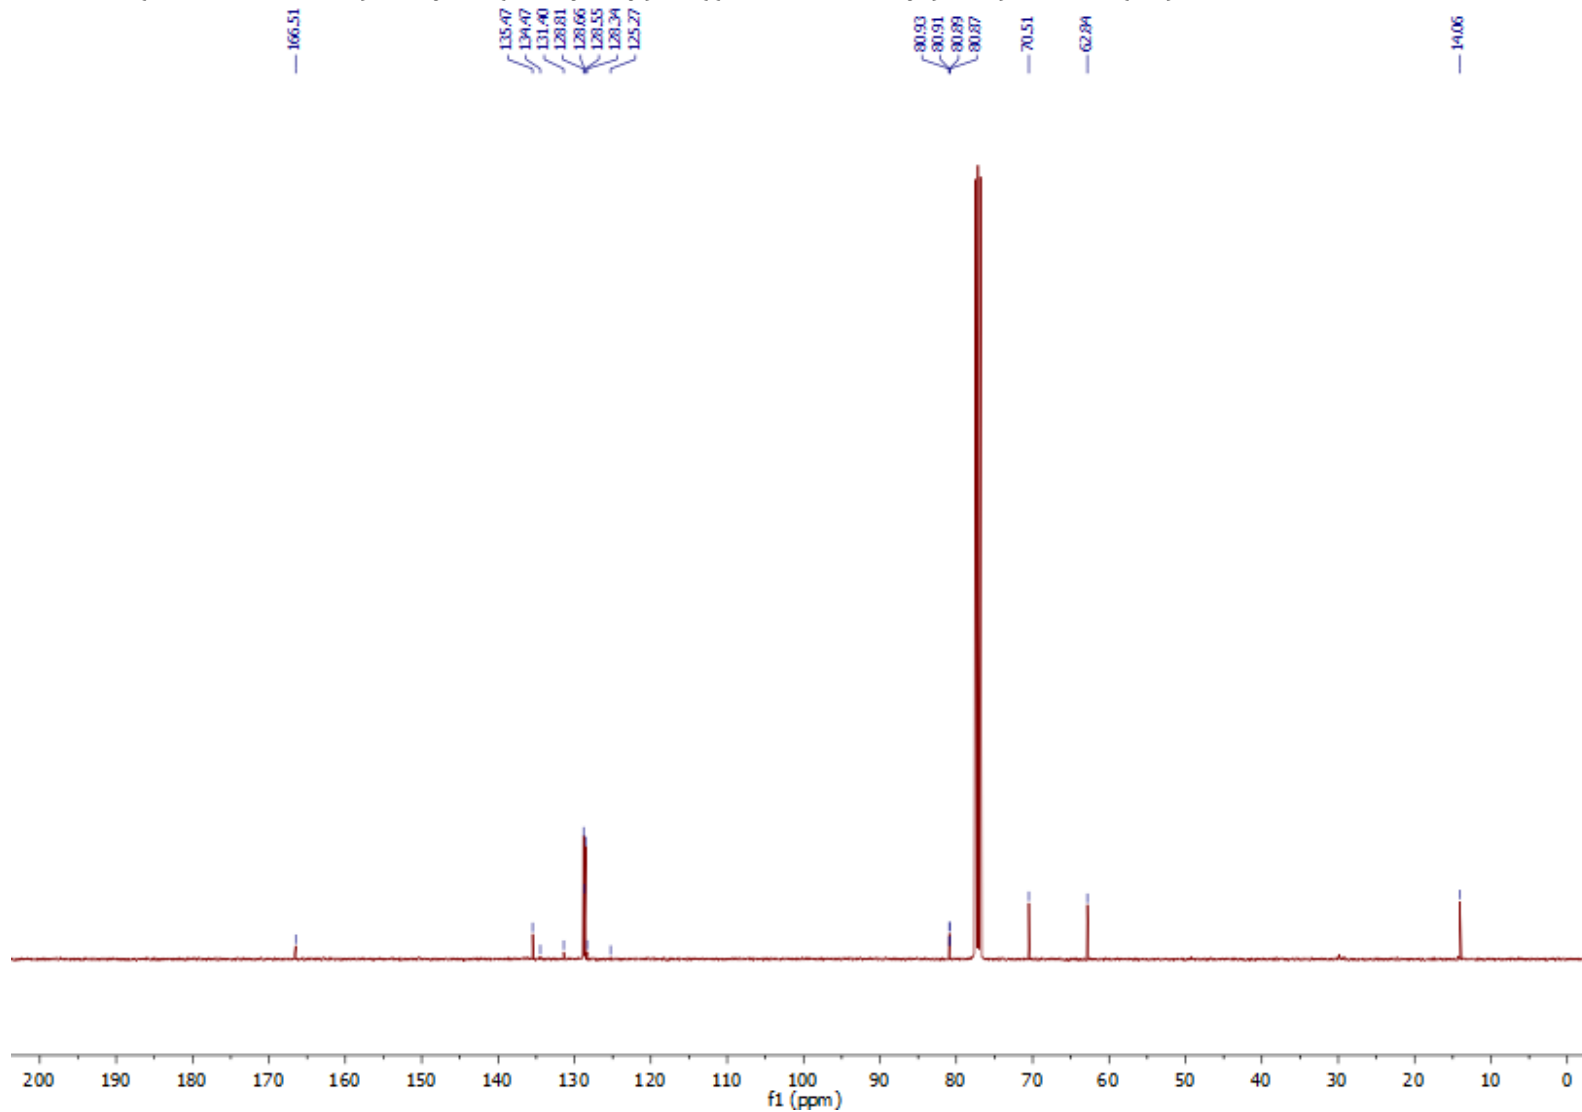

$^{19}\text{F}$  NMR ( $\text{CDCl}_3$ , 377 MHz). Ethyl 2-(benzyloxy)-2-((trifluoromethyl)thio)acetate (**5o**)

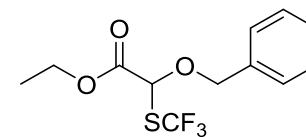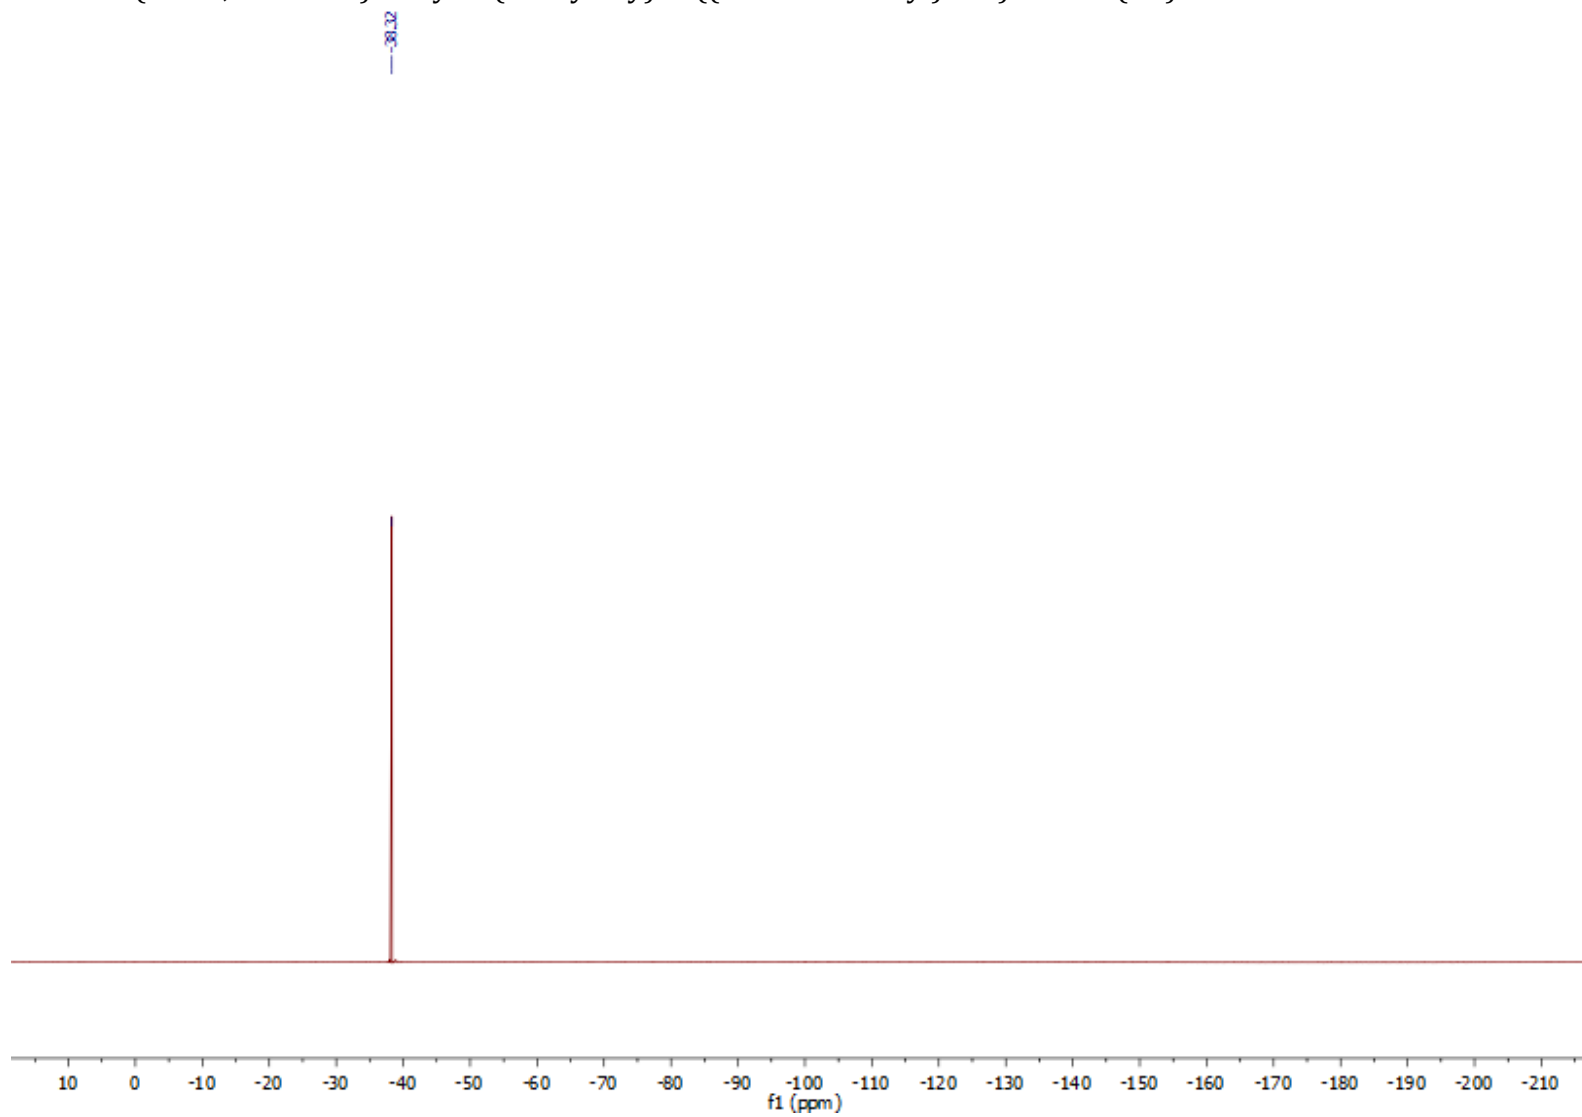

<sup>1</sup>H NMR (CDCl<sub>3</sub>, 400 MHz). Methyl 2-(benzyloxy)-2-phenyl-2-((trifluoromethyl)thio)acetate (5p)

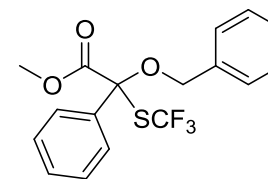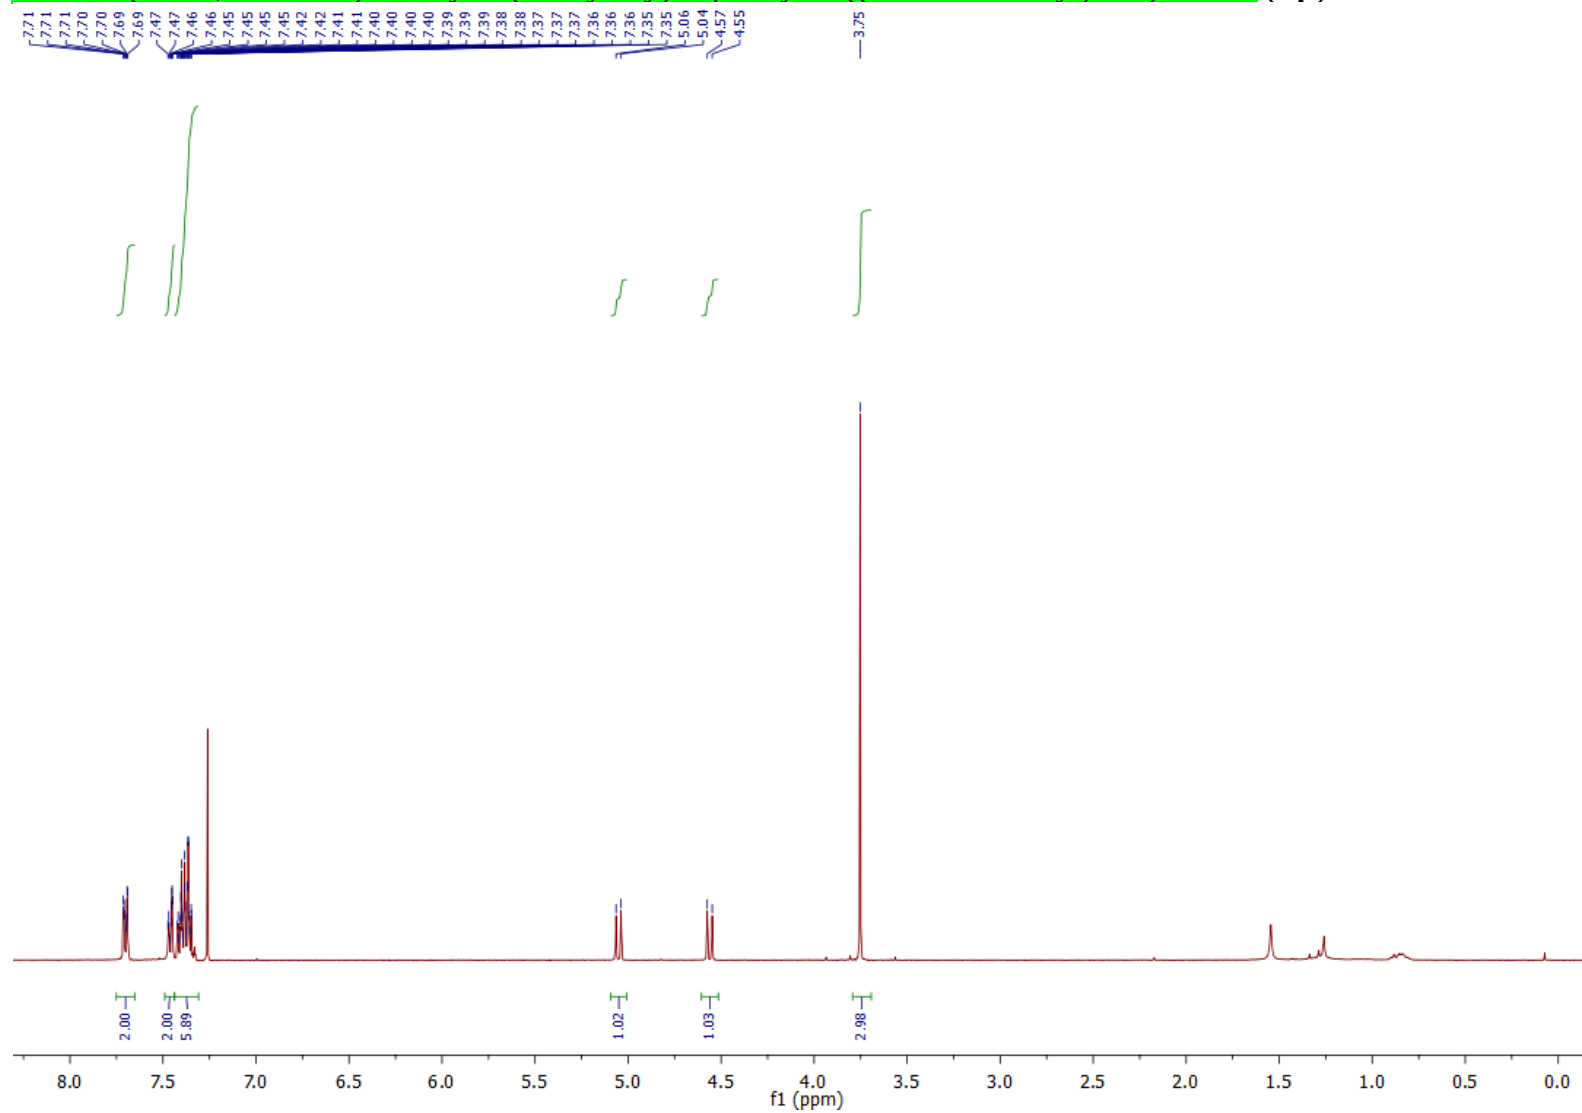

$^{13}\text{C}$  NMR ( $\text{CDCl}_3$ , 100 MHz). Methyl 2-(benzyloxy)-2-phenyl-2-((trifluoromethyl)thio)acetate (**5p**)

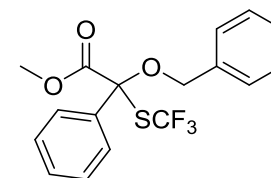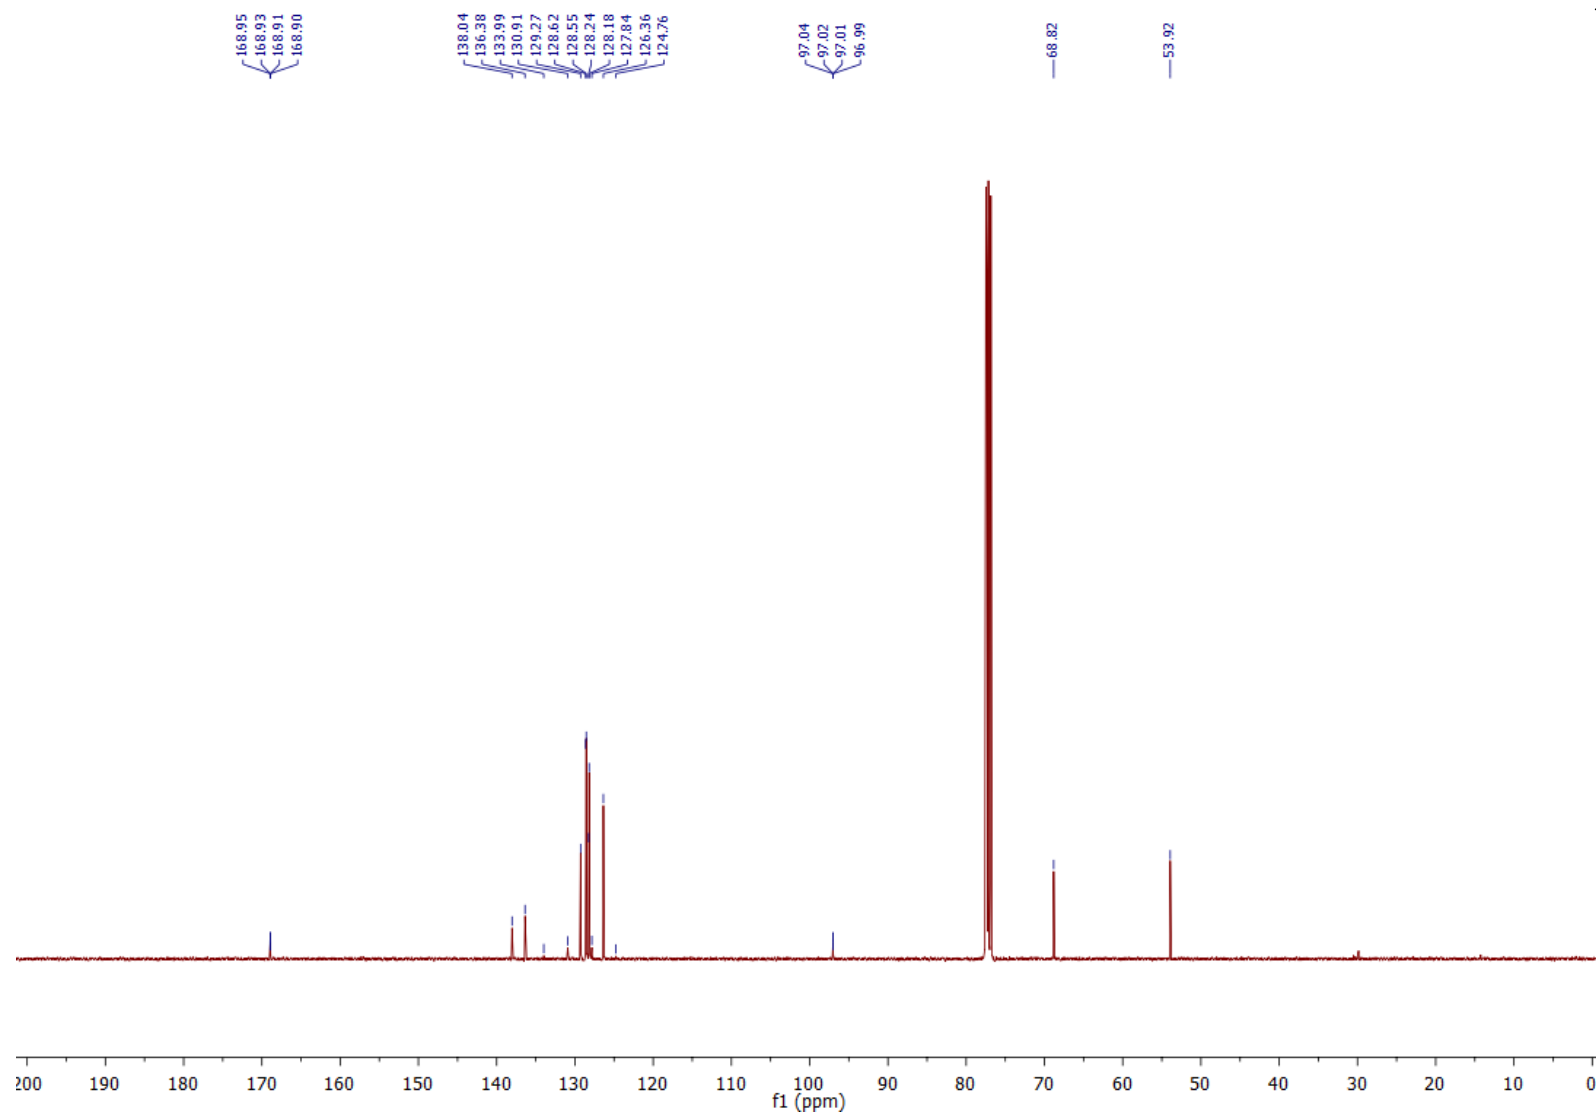

$^{19}\text{F}$  NMR ( $\text{CDCl}_3$ , 377 MHz). Methyl 2-(benzyloxy)-2-phenyl-2-((trifluoromethyl)thio)acetate (**5p**)

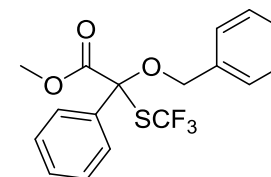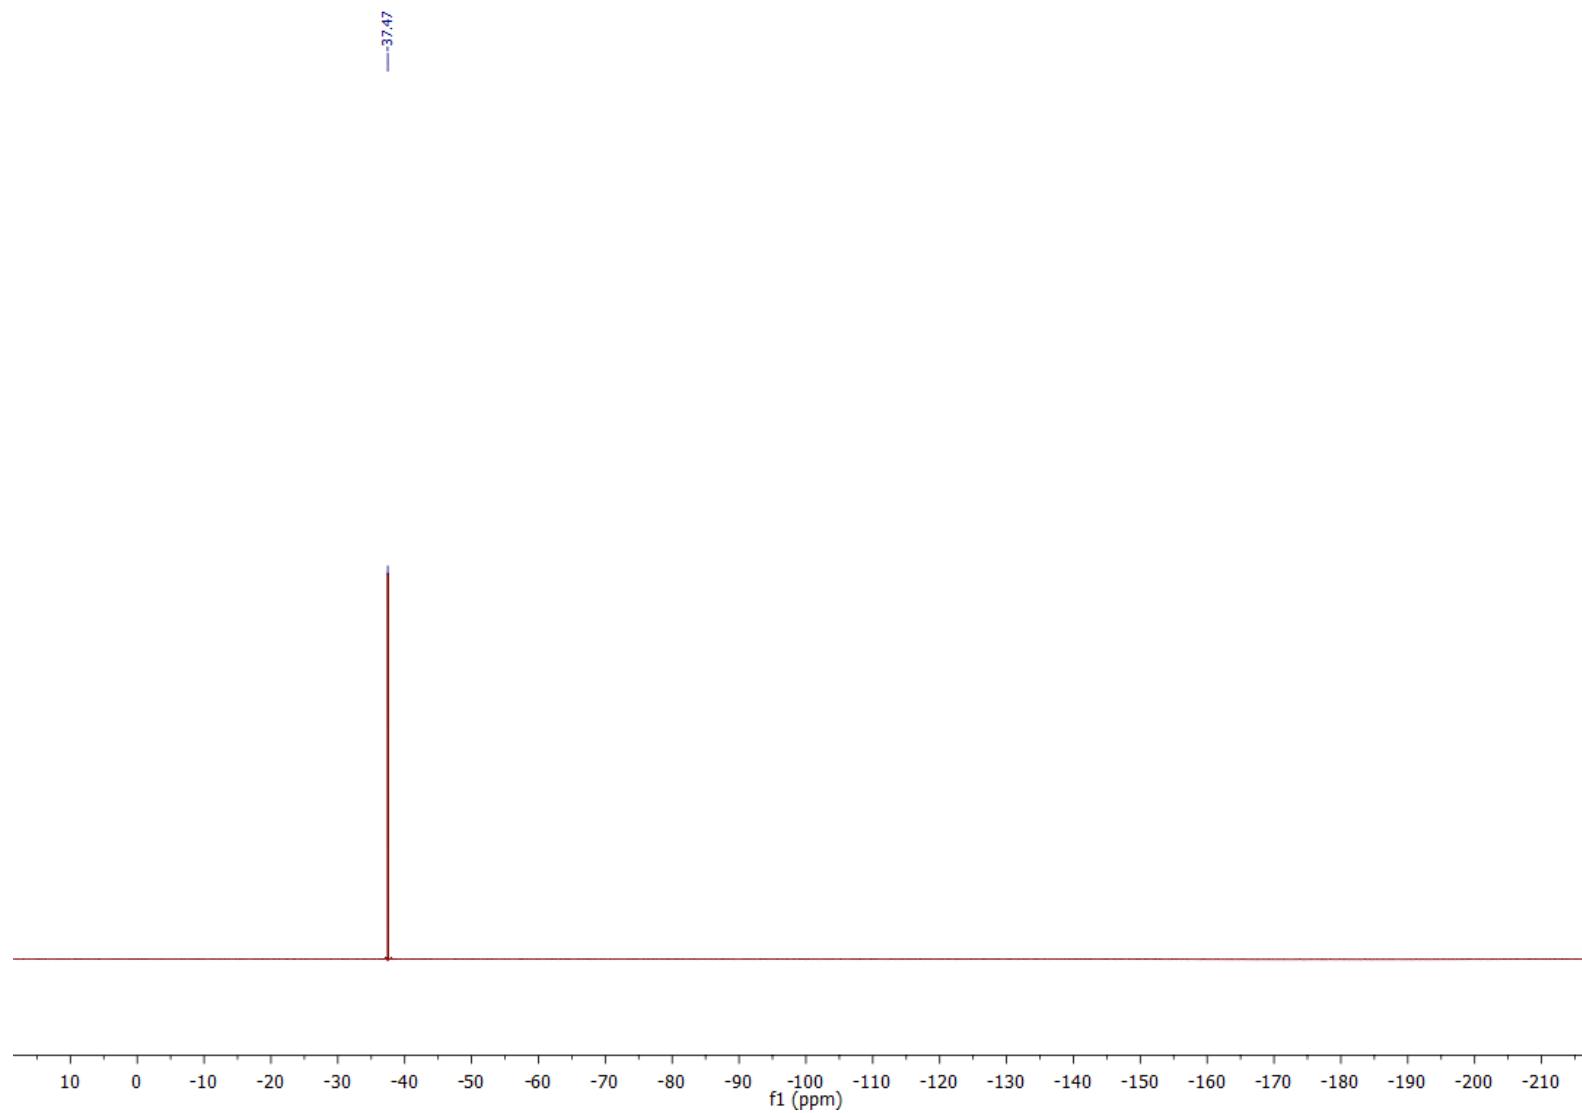



$^1\text{H}$  NMR ( $\text{CDCl}_3$ , 400 MHz). 2-Methoxy-1-phenyl-2-((trifluoromethyl)thio)ethan-1-one (**5q**)

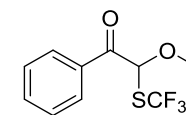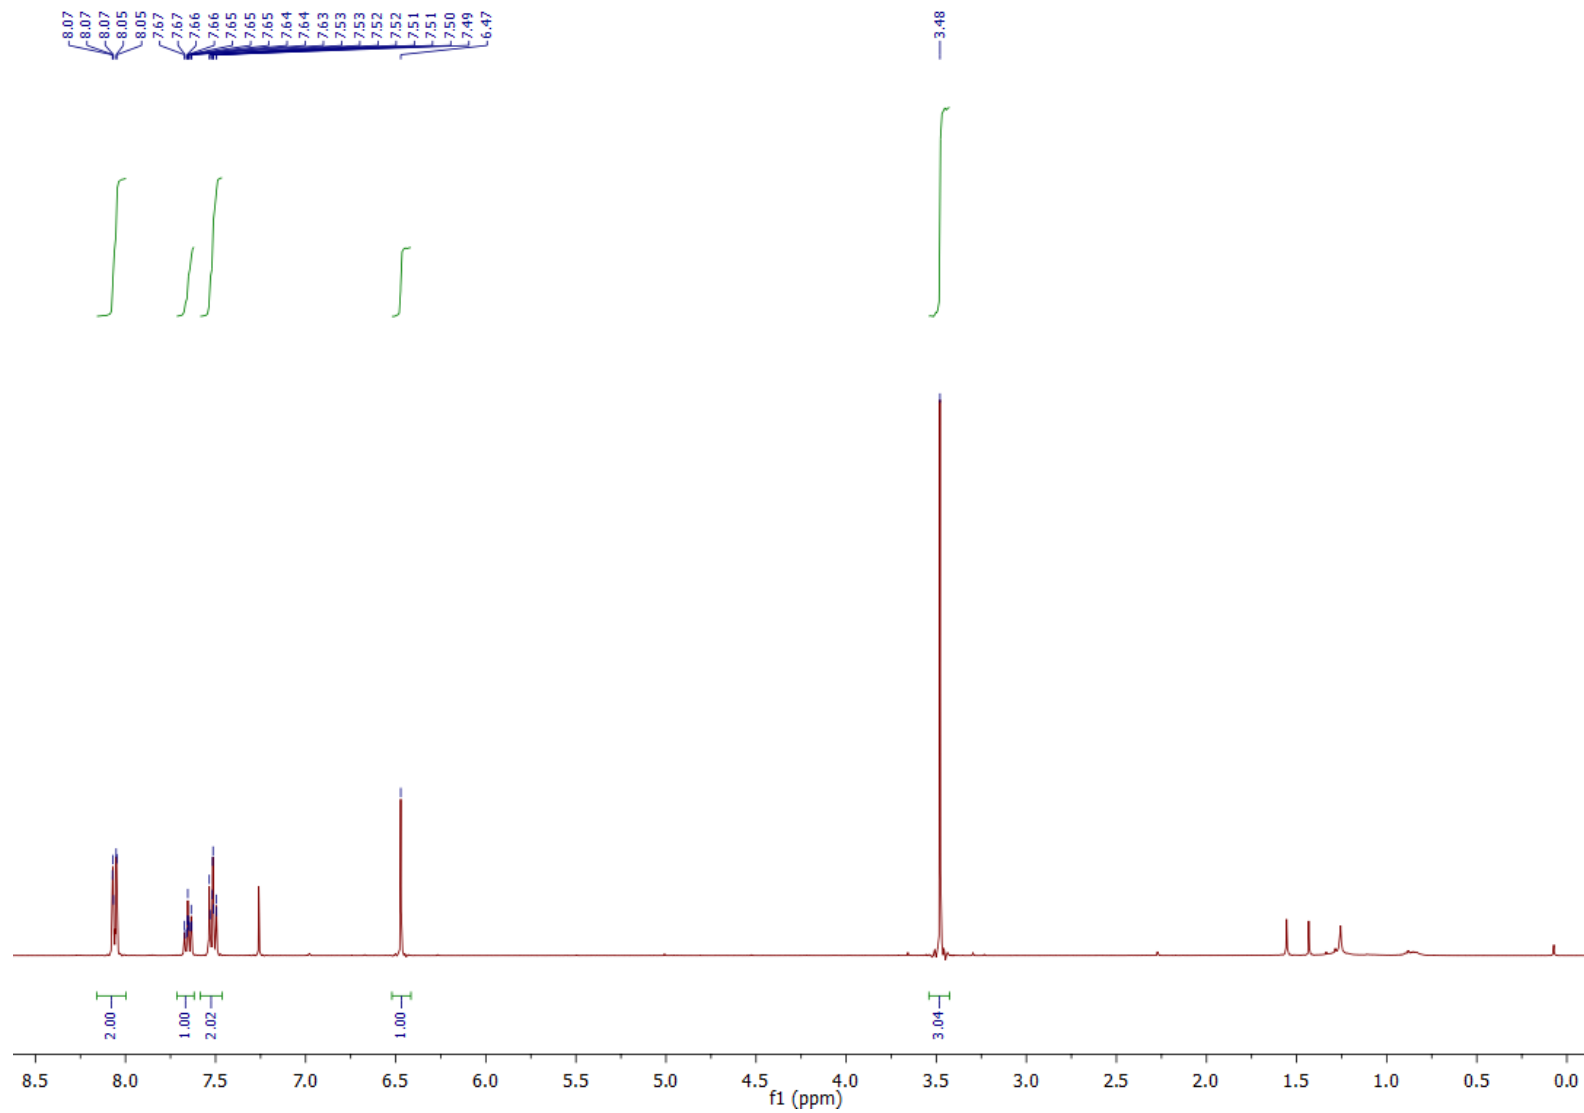

$^{13}\text{C}$  NMR ( $\text{CDCl}_3$ , 100 MHz). 2-Methoxy-1-phenyl-2-((trifluoromethyl)thio)ethan-1-one (**5q**)

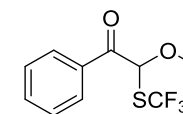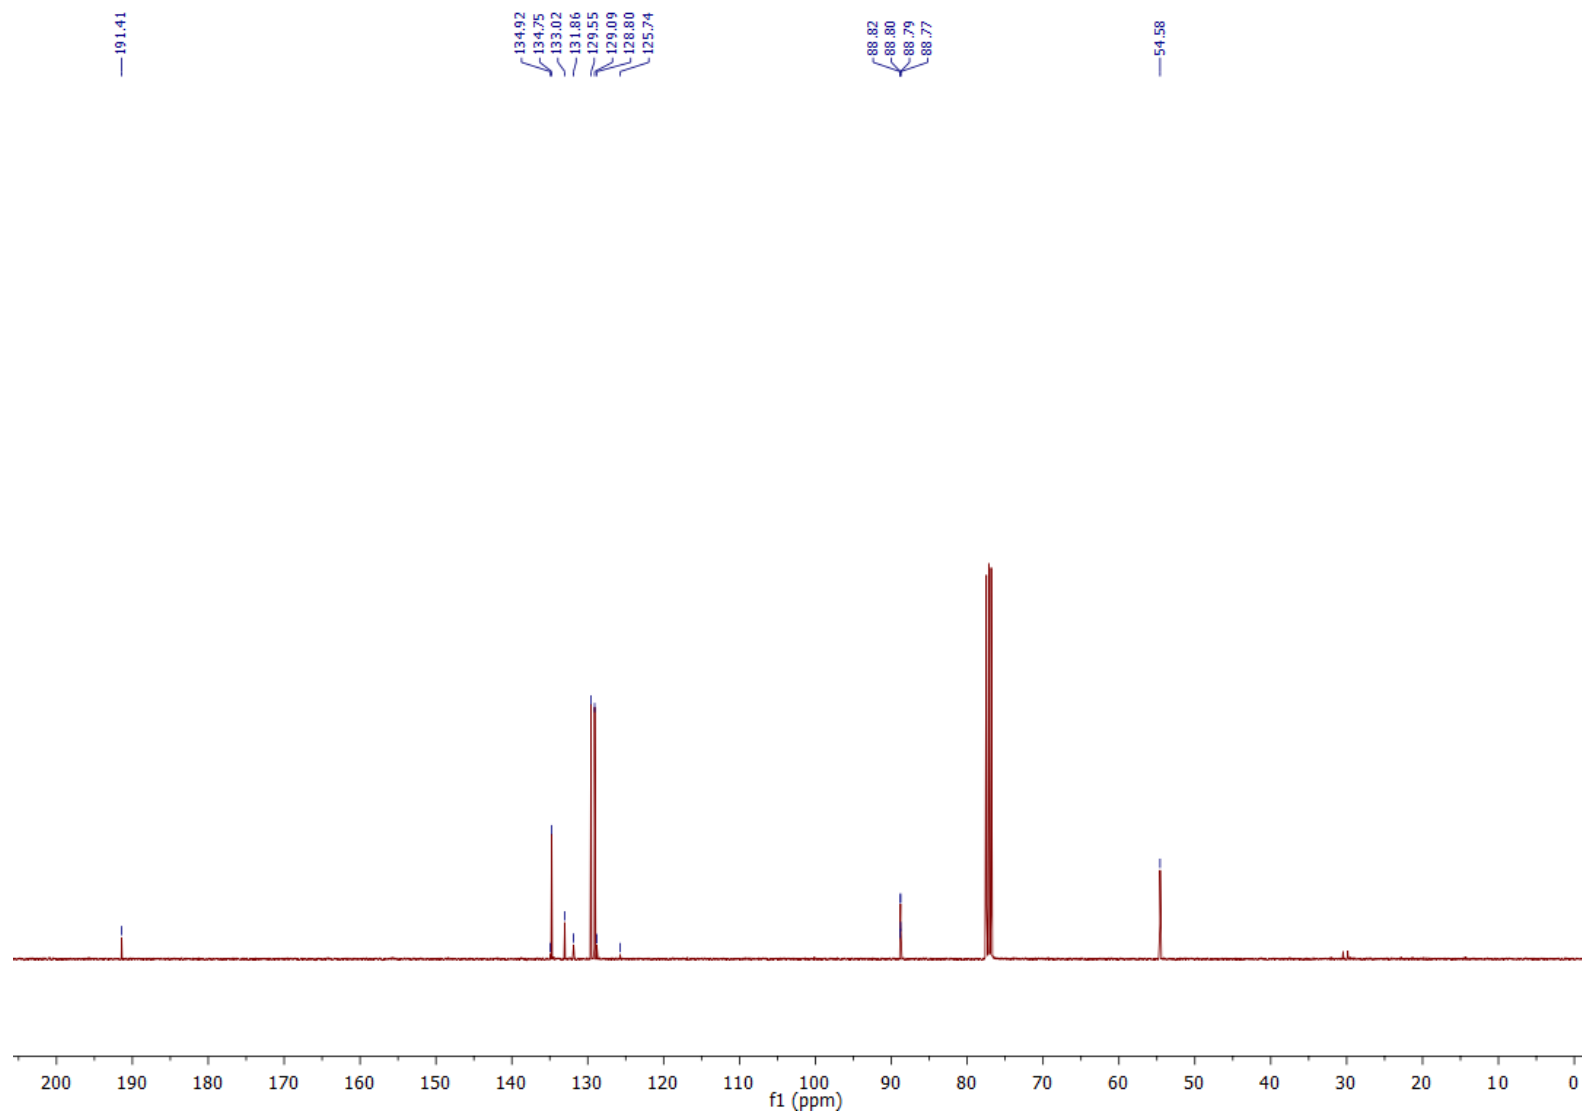

$^{19}\text{F}$  NMR ( $\text{CDCl}_3$ , 377 MHz). 2-Methoxy-1-phenyl-2-((trifluoromethyl)thio)ethan-1-one (**5q**)

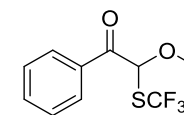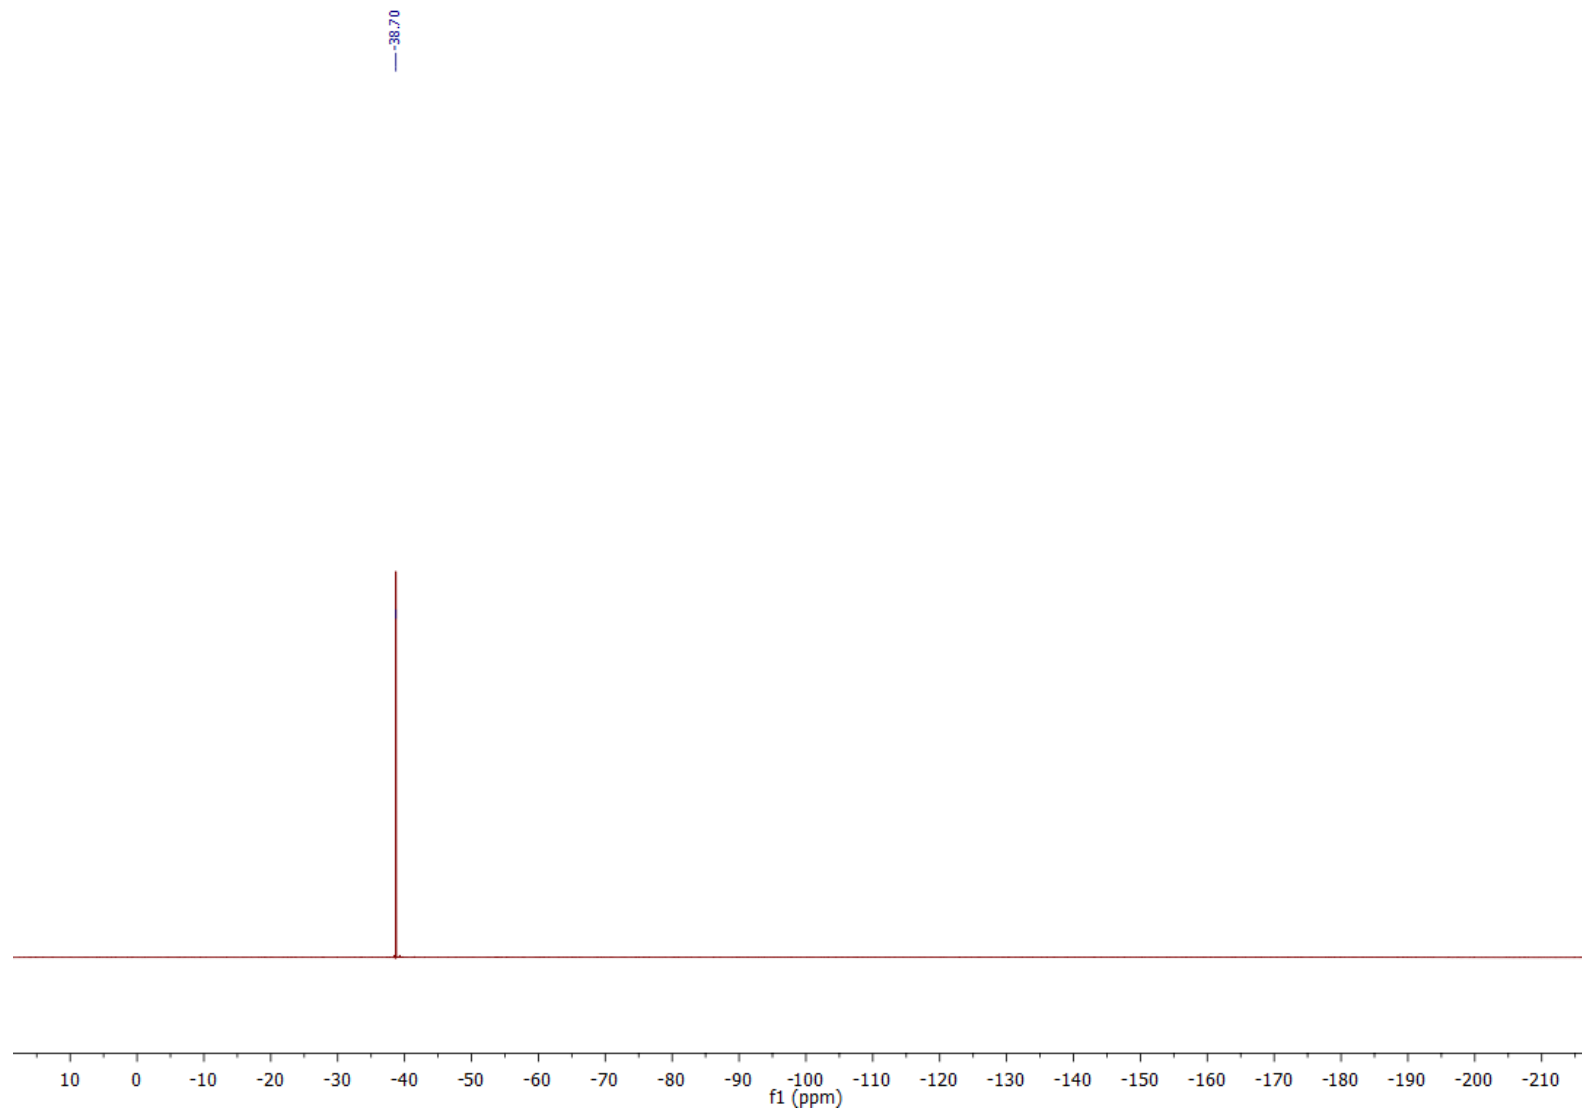

$^1\text{H}$  NMR ( $\text{CDCl}_3$ , 400 MHz). 1-(4-Bromophenyl)-2-methoxy-2-((trifluoromethyl)thio)ethan-1-one (**5r**)

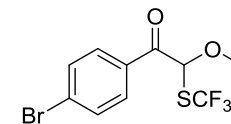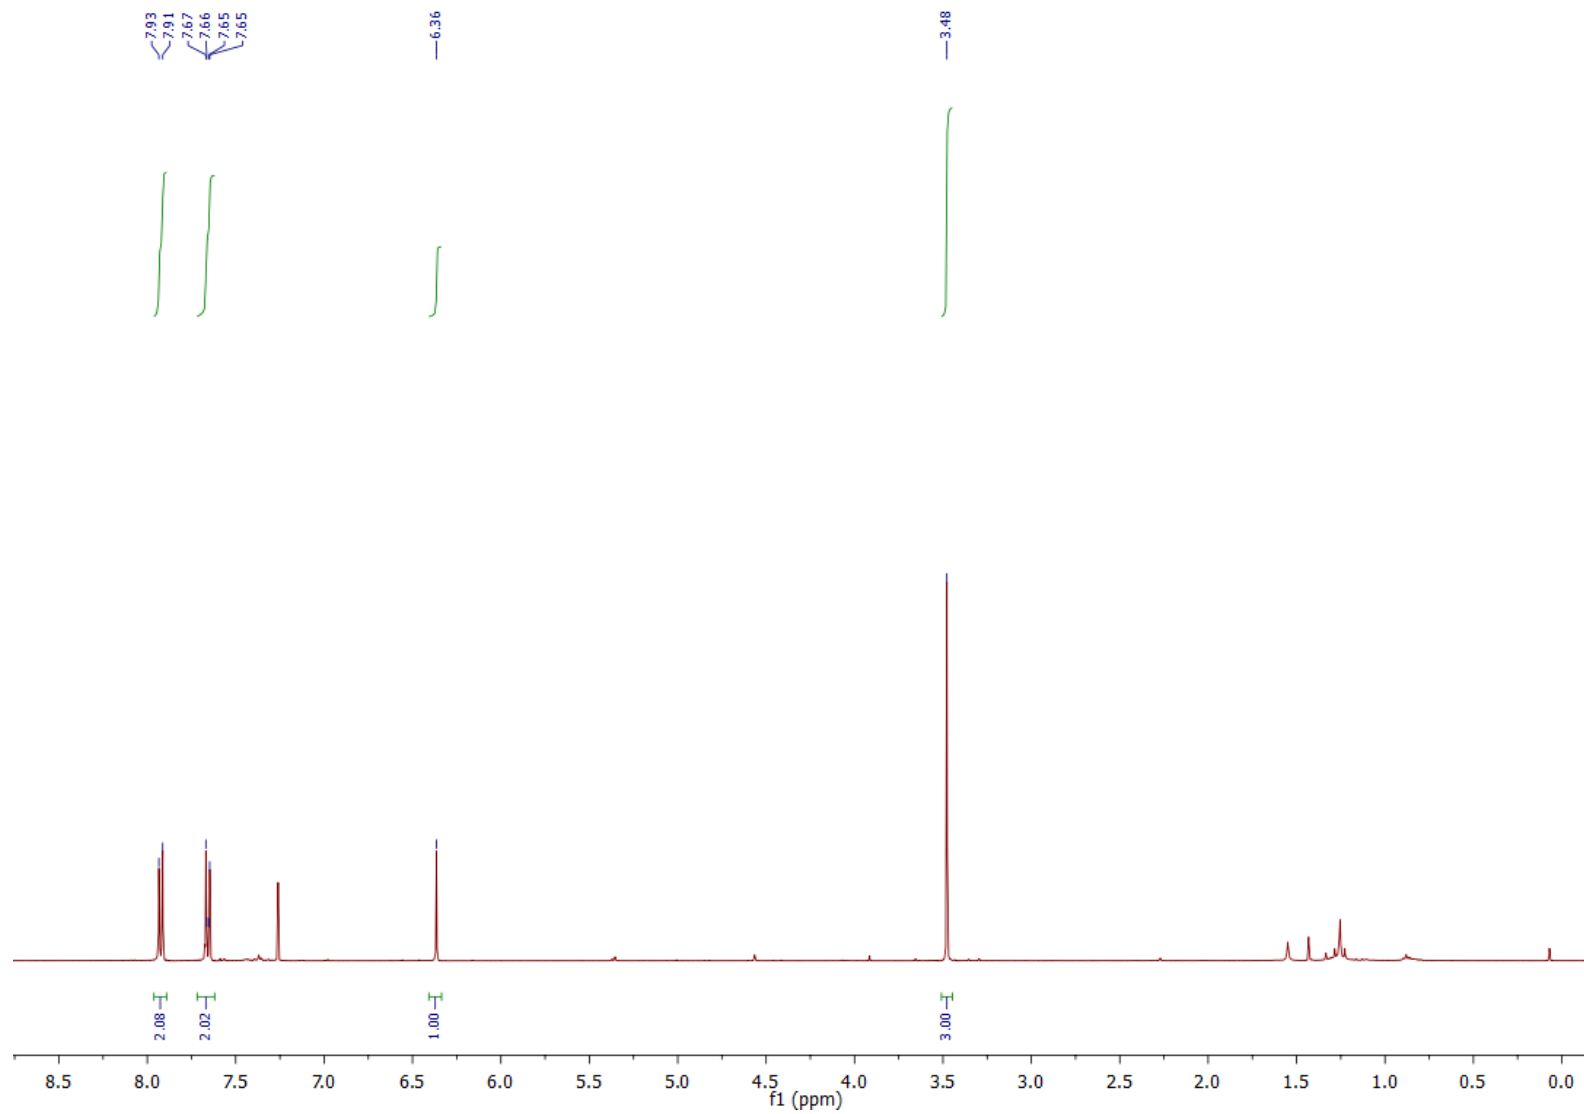

$^{13}\text{C}$  NMR ( $\text{CDCl}_3$ , 100 MHz). 1-(4-Bromophenyl)-2-methoxy-2-((trifluoromethyl)thio)ethan-1-one (**5r**)

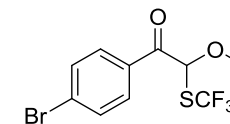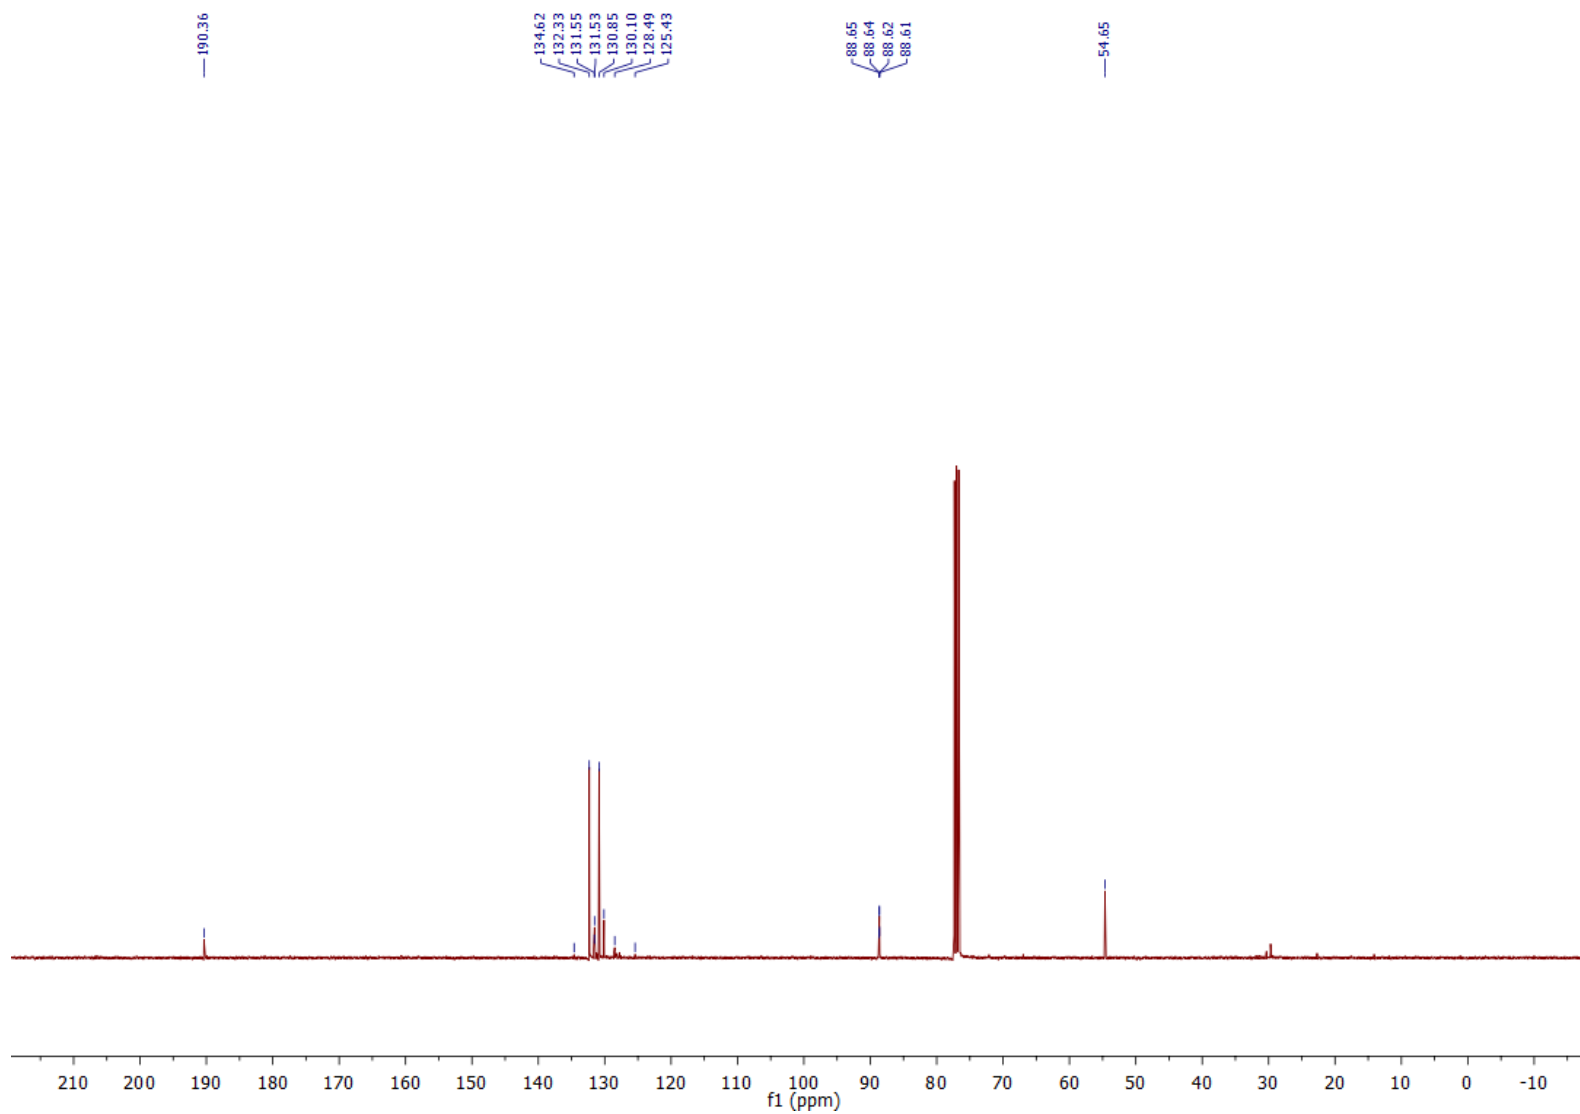

$^{19}\text{F}$  NMR ( $\text{CDCl}_3$ , 377 MHz). 1-(4-Bromophenyl)-2-methoxy-2-((trifluoromethyl)thio)ethan-1-one (**5r**)

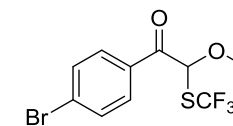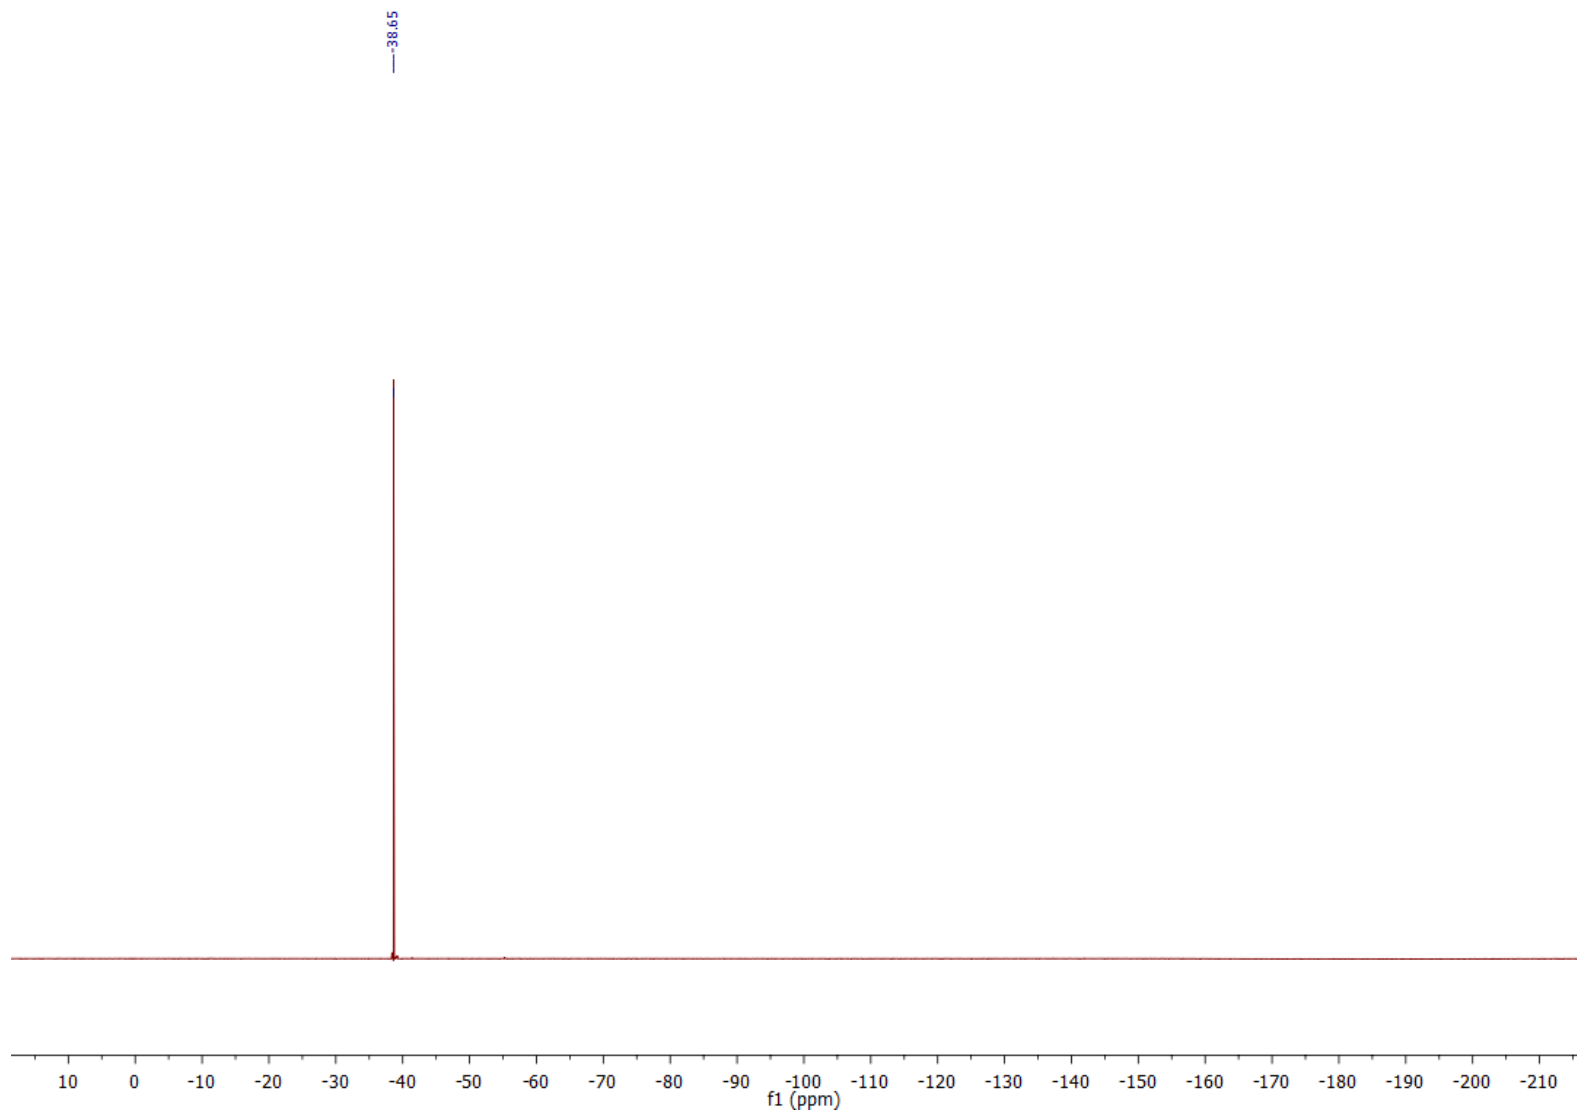

$^1\text{H}$  NMR ( $\text{CDCl}_3$ , 400 MHz). 2-(2-(2-Methoxyethoxy)ethoxy)-1-phenyl-2-((trifluoromethyl)thio)ethan-1-one (**5s**)

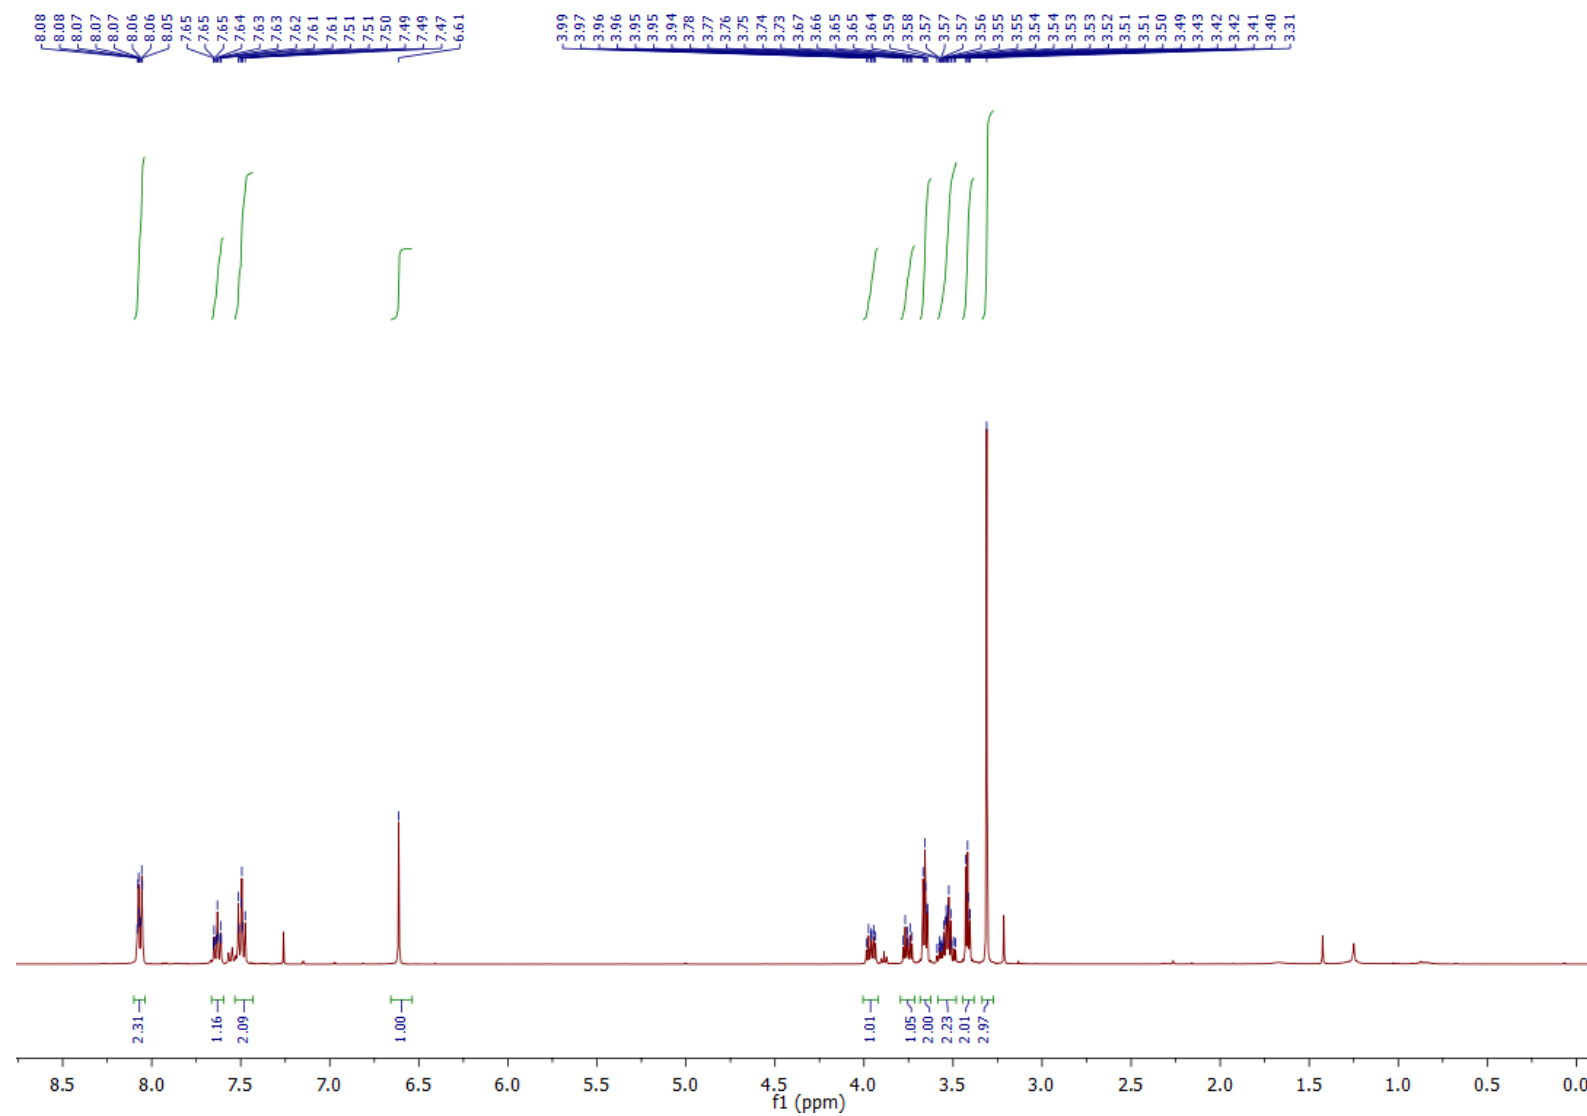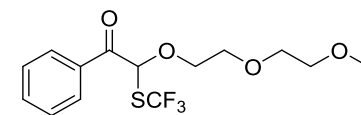

$^{13}\text{C}$  NMR ( $\text{CDCl}_3$ , 100 MHz). 2-(2-(2-Methoxyethoxy)ethoxy)-1-phenyl-2-((trifluoromethyl)thio)ethan-1-one (**5s**)

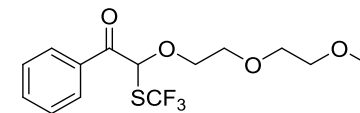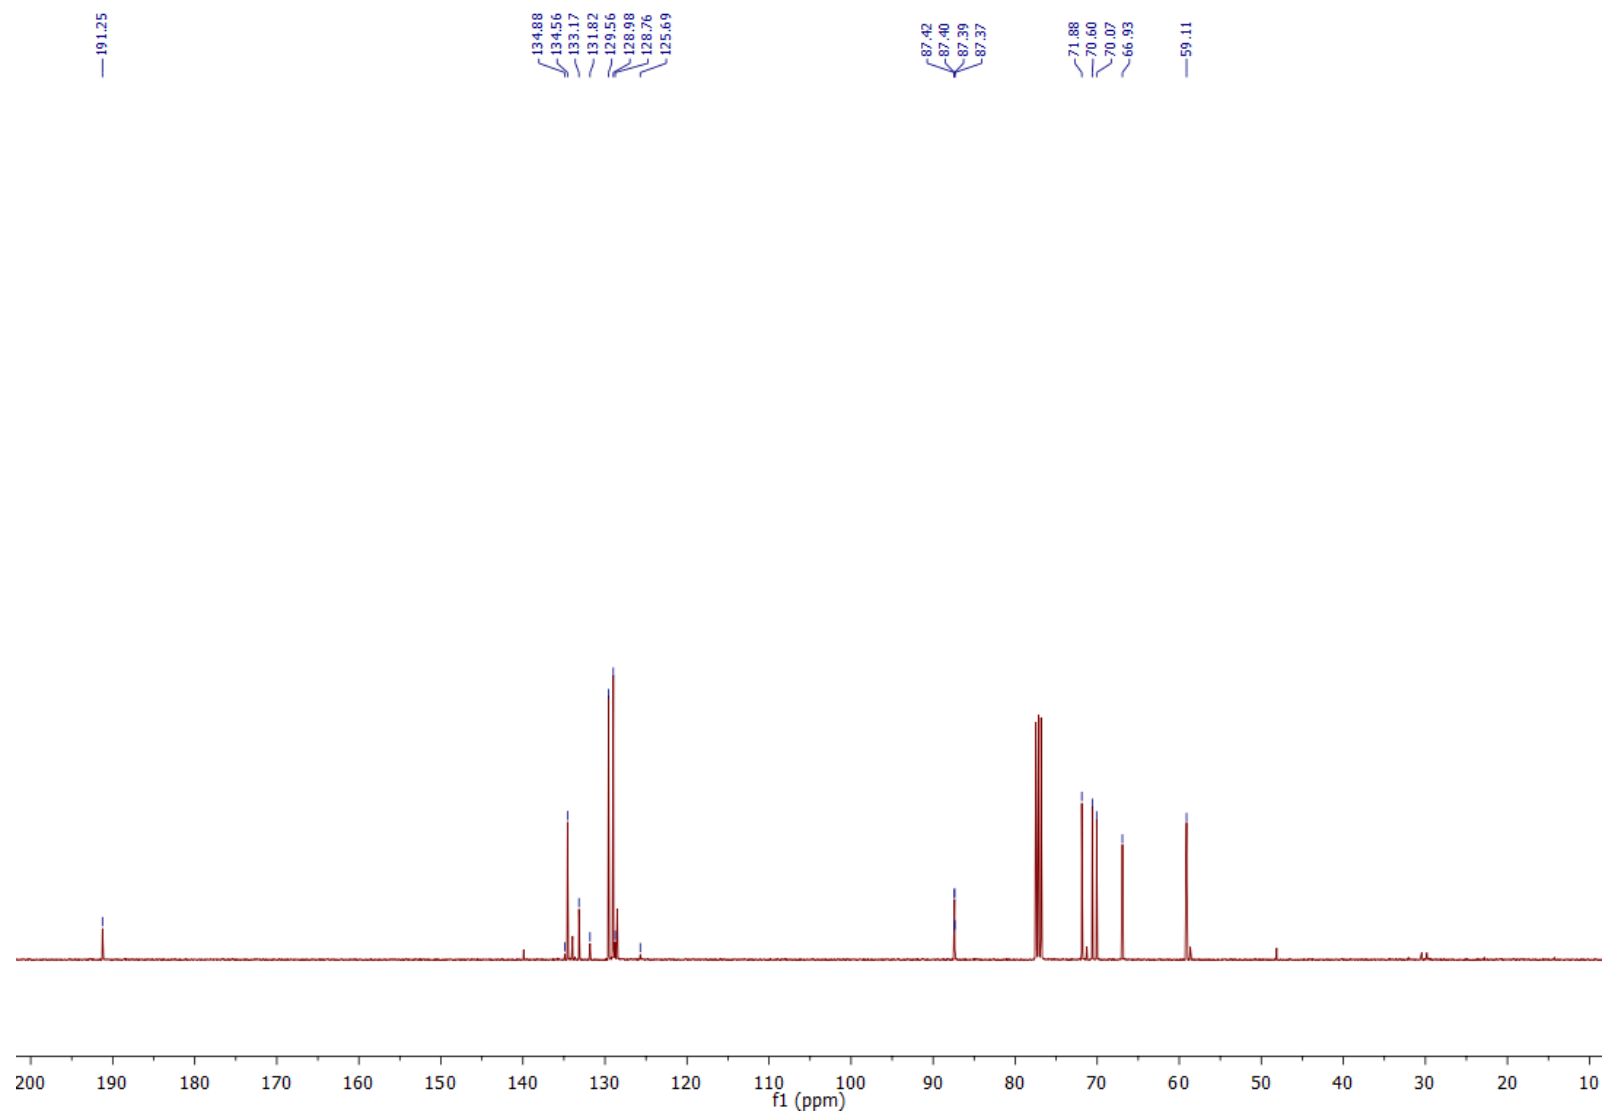



$^{19}\text{F}$  NMR ( $\text{CDCl}_3$ , 377 MHz). 2-(2-(2-Methoxyethoxy)ethoxy)-1-phenyl-2-((trifluoromethyl)thio)ethan-1-one (**5s**)

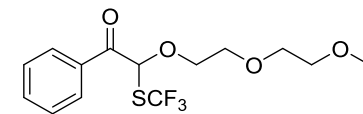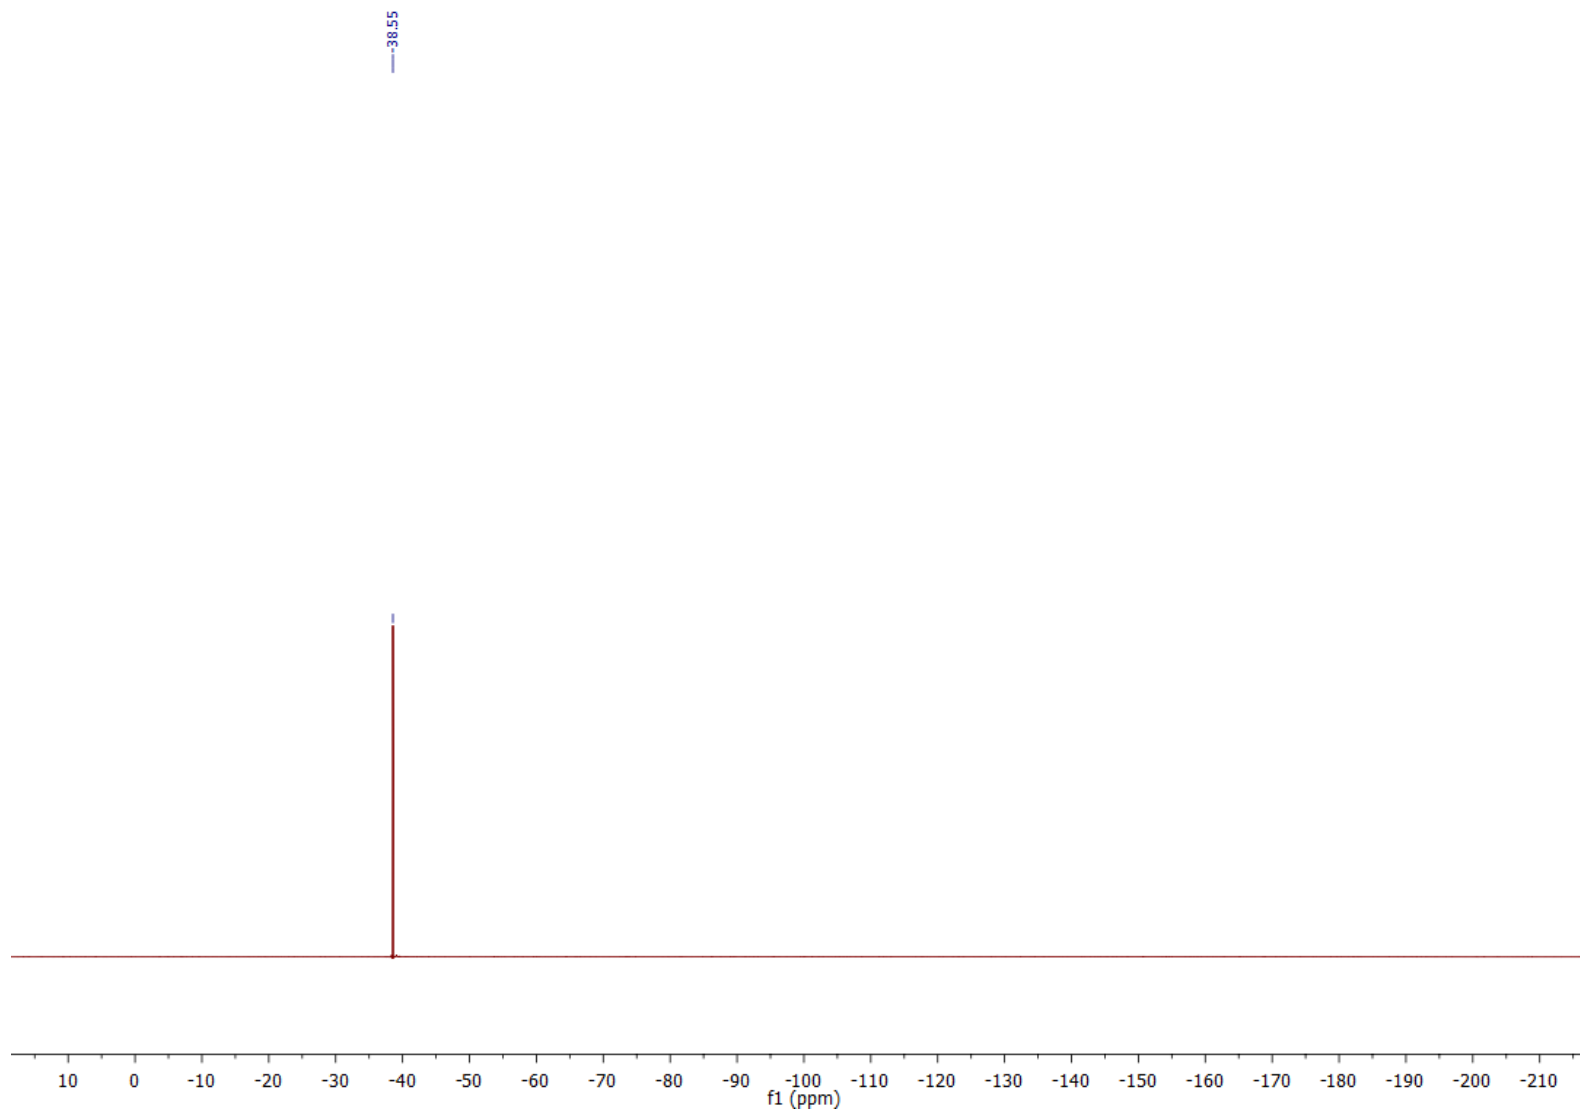

S73

$^1\text{H}$  NMR ( $\text{CDCl}_3$ , 400 MHz). *N*-(4-(2-oxo-2-phenyl-1-((trifluoromethyl)thio)ethoxy)butyl)-*N*-(phenylsulfonyl)benzenesulfonamide (**8a**)

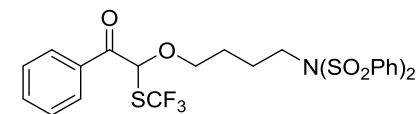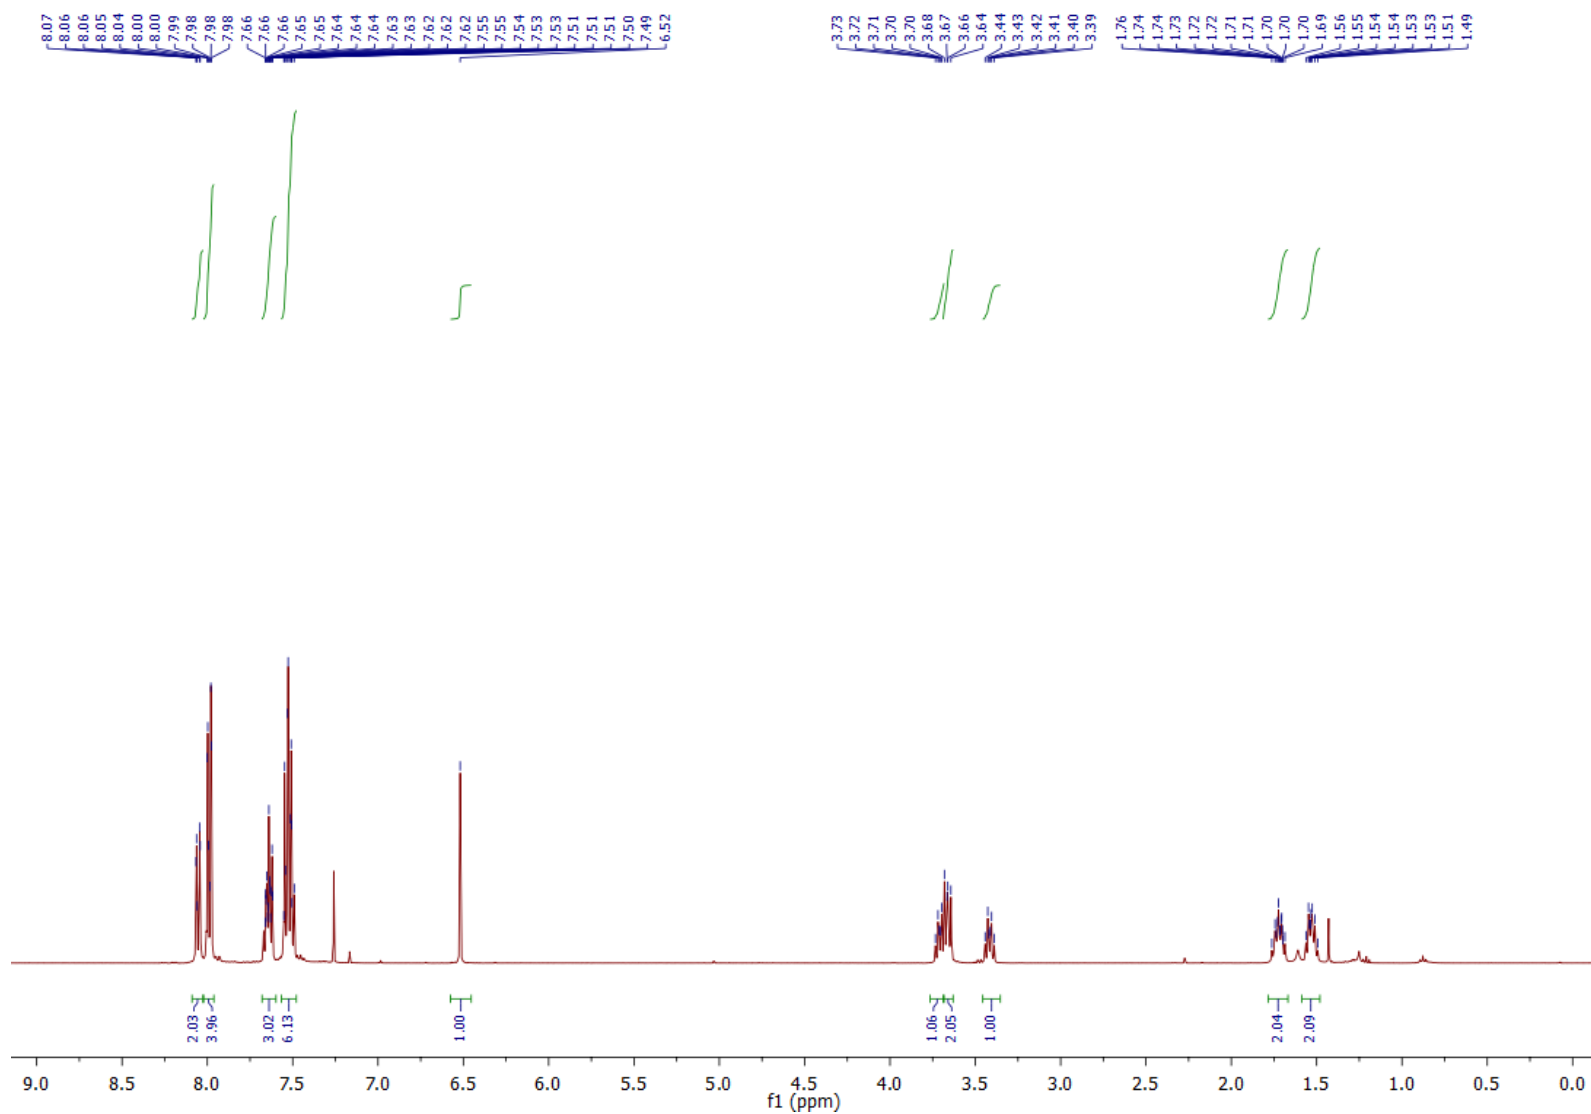

$^{13}\text{C}$  NMR ( $\text{CDCl}_3$ , 100 MHz). *N*-(4-(2-oxo-2-phenyl-1-((trifluoromethyl)thio)ethoxy)butyl)-*N*-(phenylsulfonyl)benzenesulfonamide (**8a**)

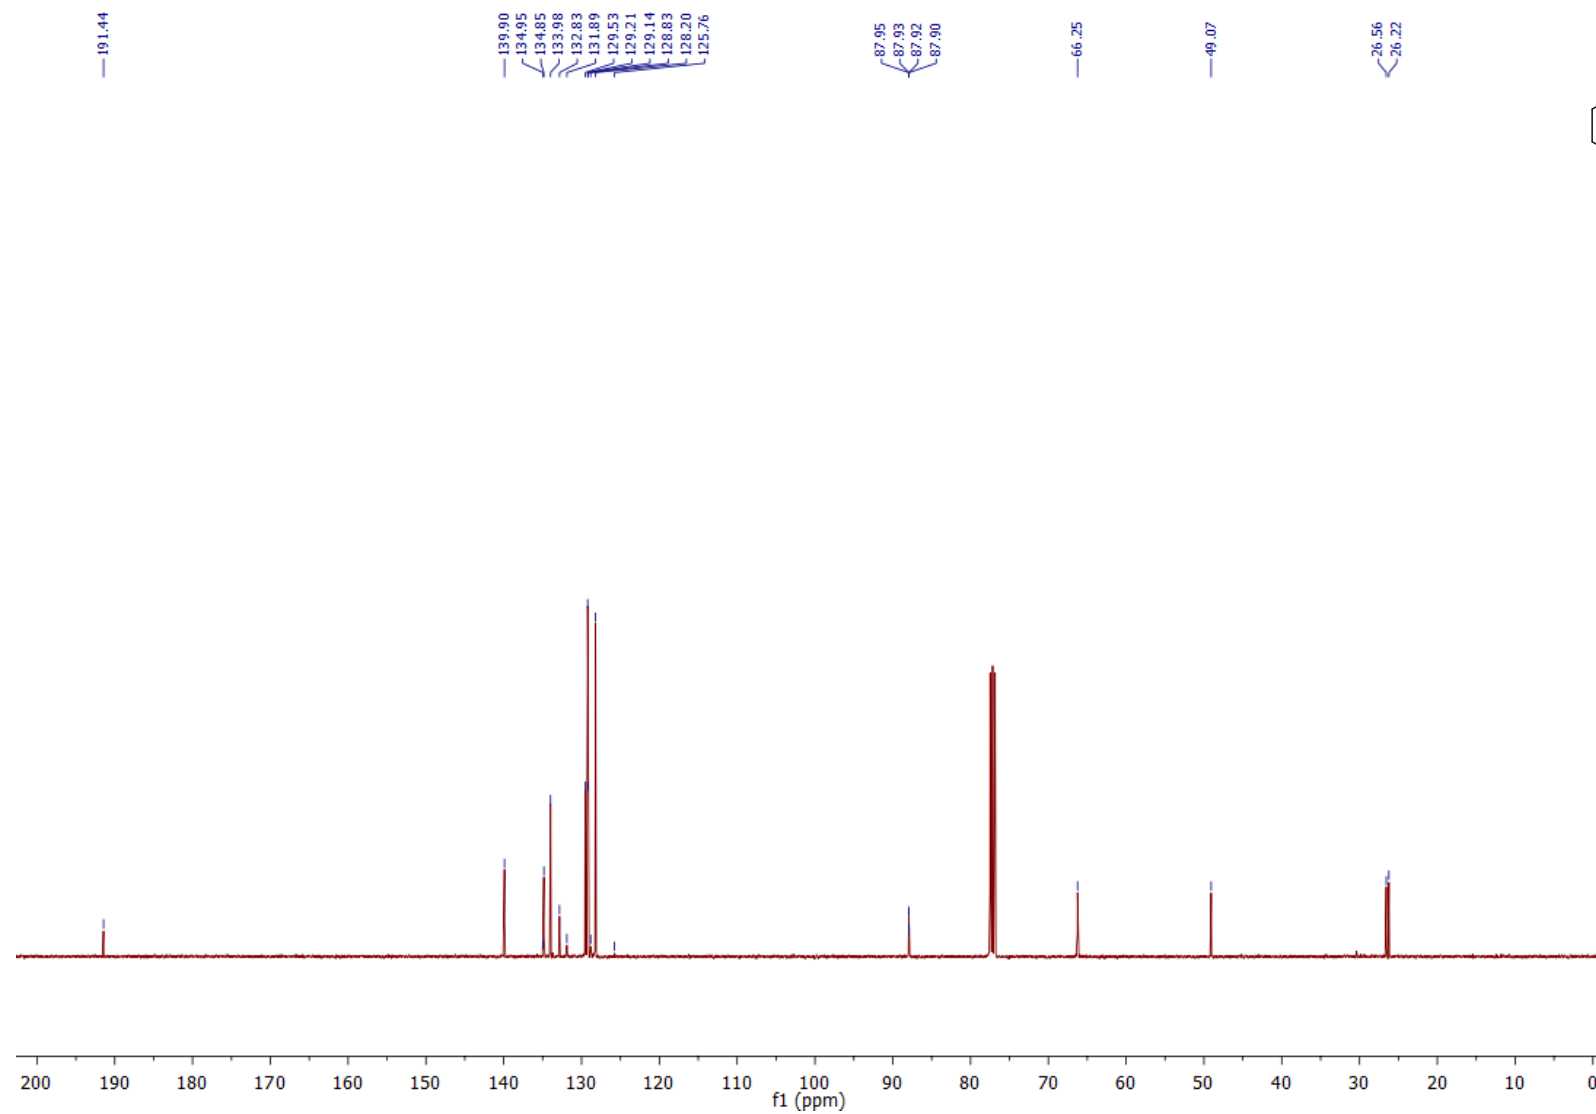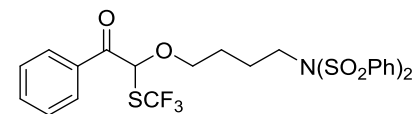

$^{19}\text{F}$  NMR ( $\text{CDCl}_3$ , 377 MHz). *N*-(4-(2-oxo-2-phenyl-1-((trifluoromethyl)thio)ethoxy)butyl)-*N*-(phenylsulfonyl)benzenesulfonamide (**8a**)

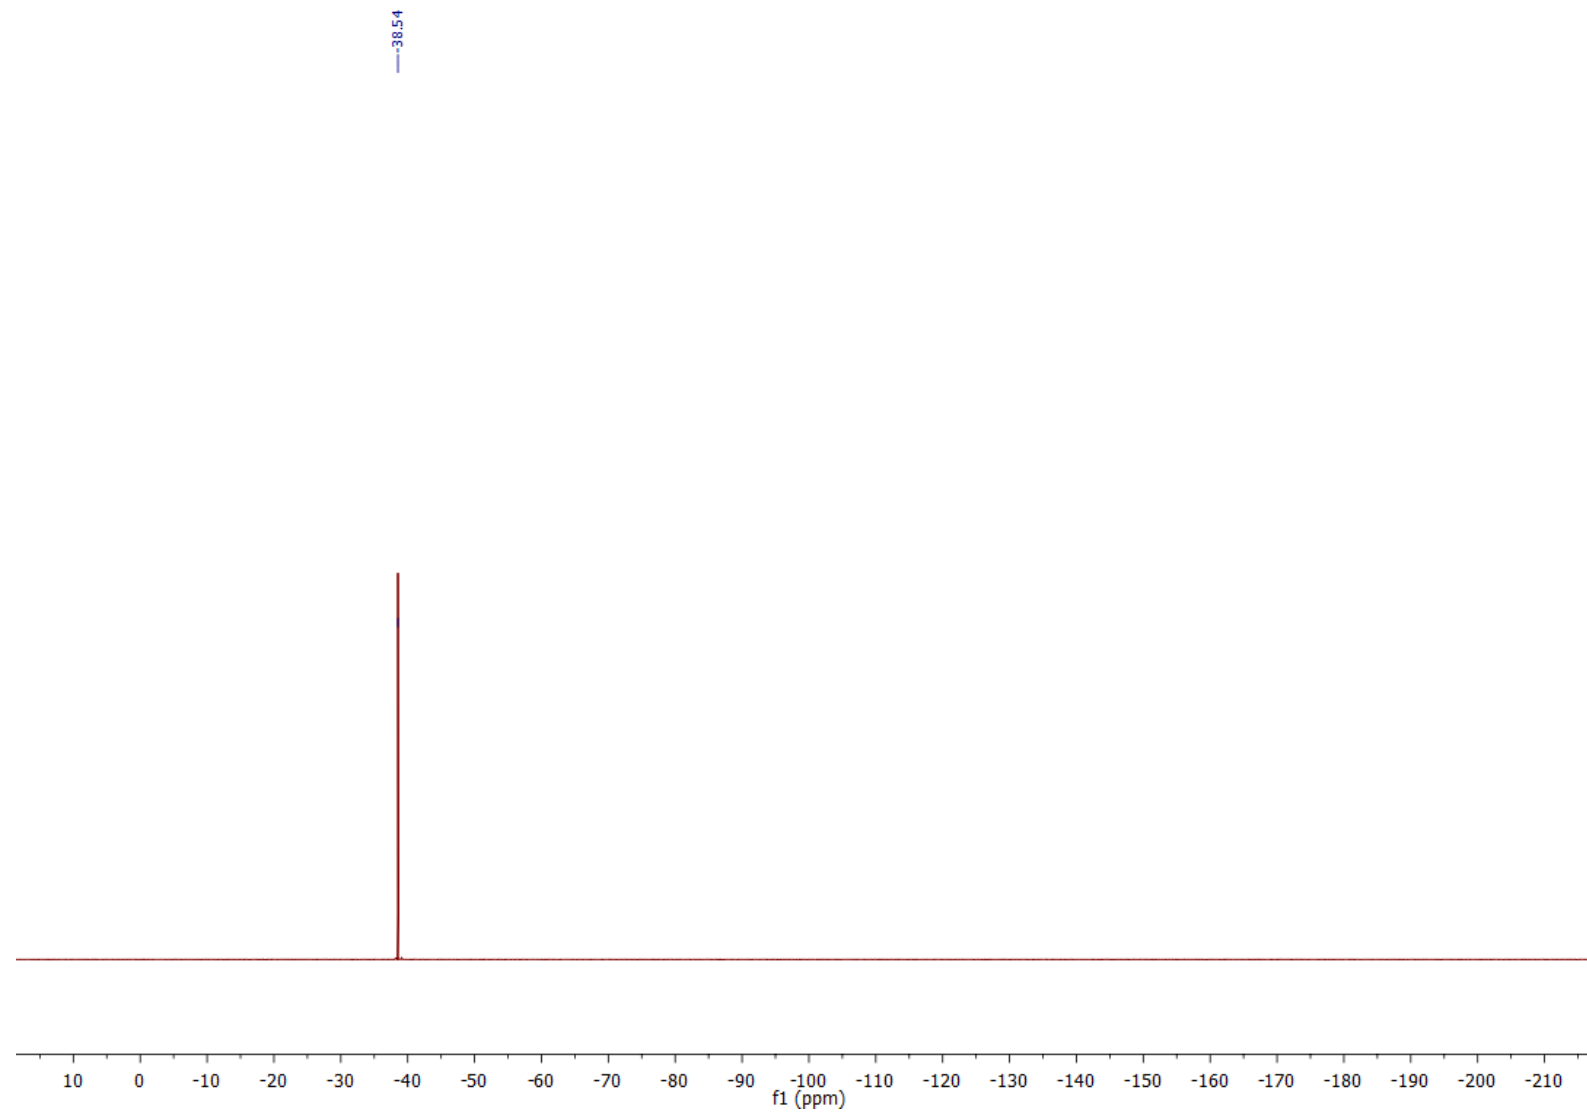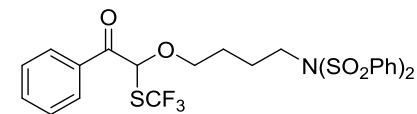

$^1\text{H}$  NMR ( $\text{CDCl}_3$ , 400 MHz).

*N*-(4-(4-(2-oxo-2-phenyl-1-((trifluoromethyl)thio)ethoxy)butoxy)butyl)-*N*-(phenylsulfonyl)benzenesulfonamide (**8b**)

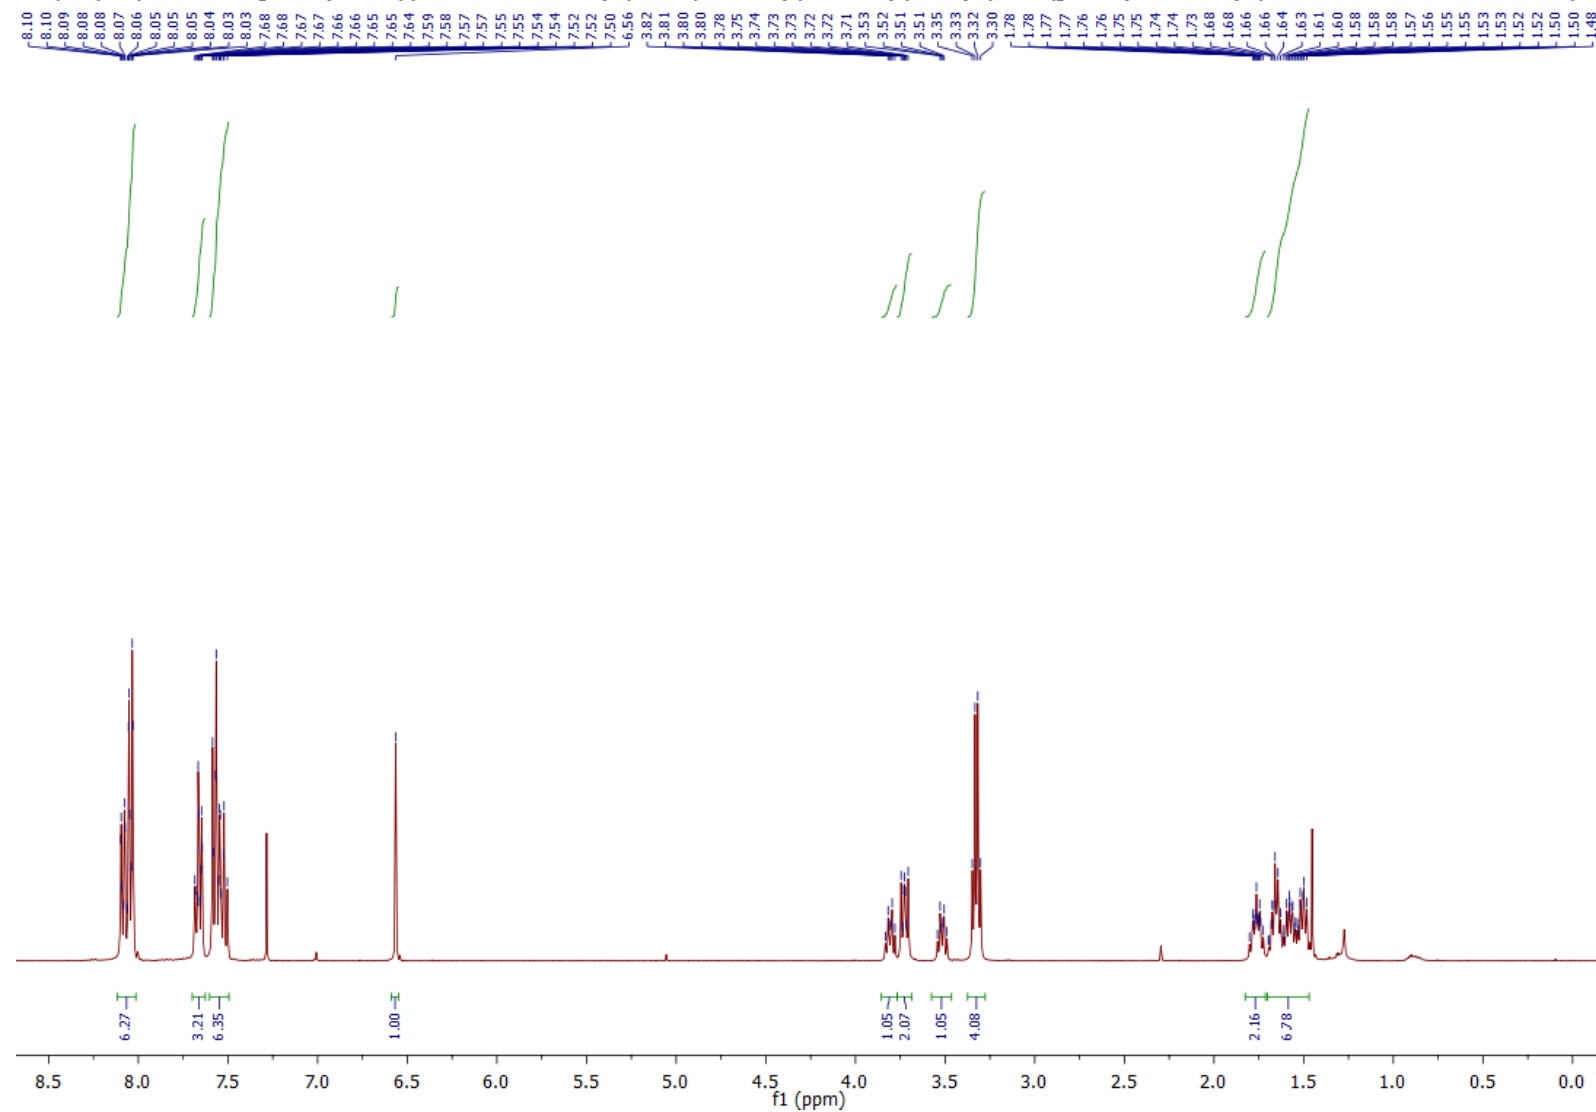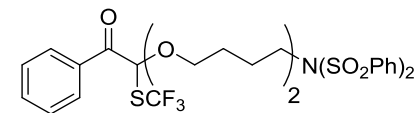

$^{13}\text{C}$  NMR ( $\text{CDCl}_3$ , 100 MHz).

*N*-(4-(4-(2-oxo-2-phenyl-1-((trifluoromethyl)thio)ethoxy)butoxy)butyl)-*N*-(phenylsulfonyl)benzenesulfonamide (**8b**)

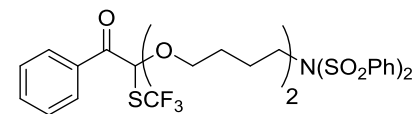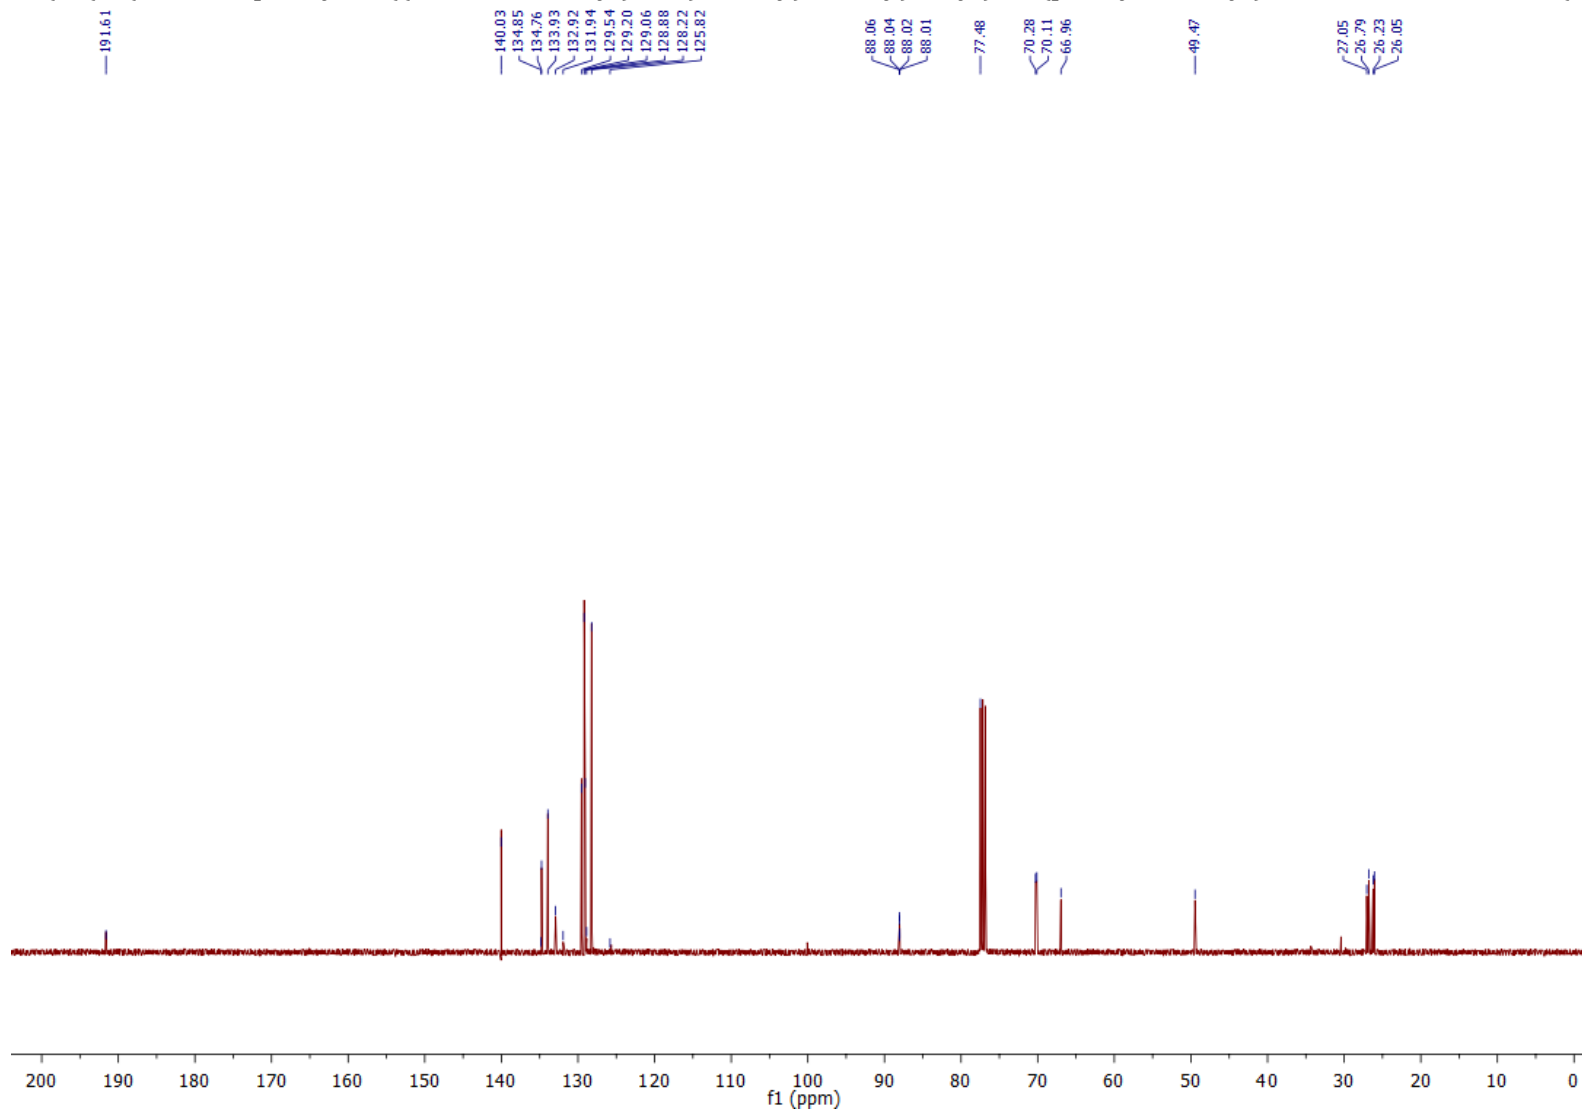

$^{19}\text{F}$  NMR ( $\text{CDCl}_3$ , 377 MHz).

*N*-(4-(4-(2-oxo-2-phenyl-1-((trifluoromethyl)thio)ethoxy)butoxy)butyl)-*N*-(phenylsulfonyl)benzenesulfonamide (**8b**)

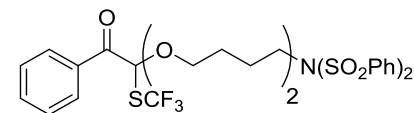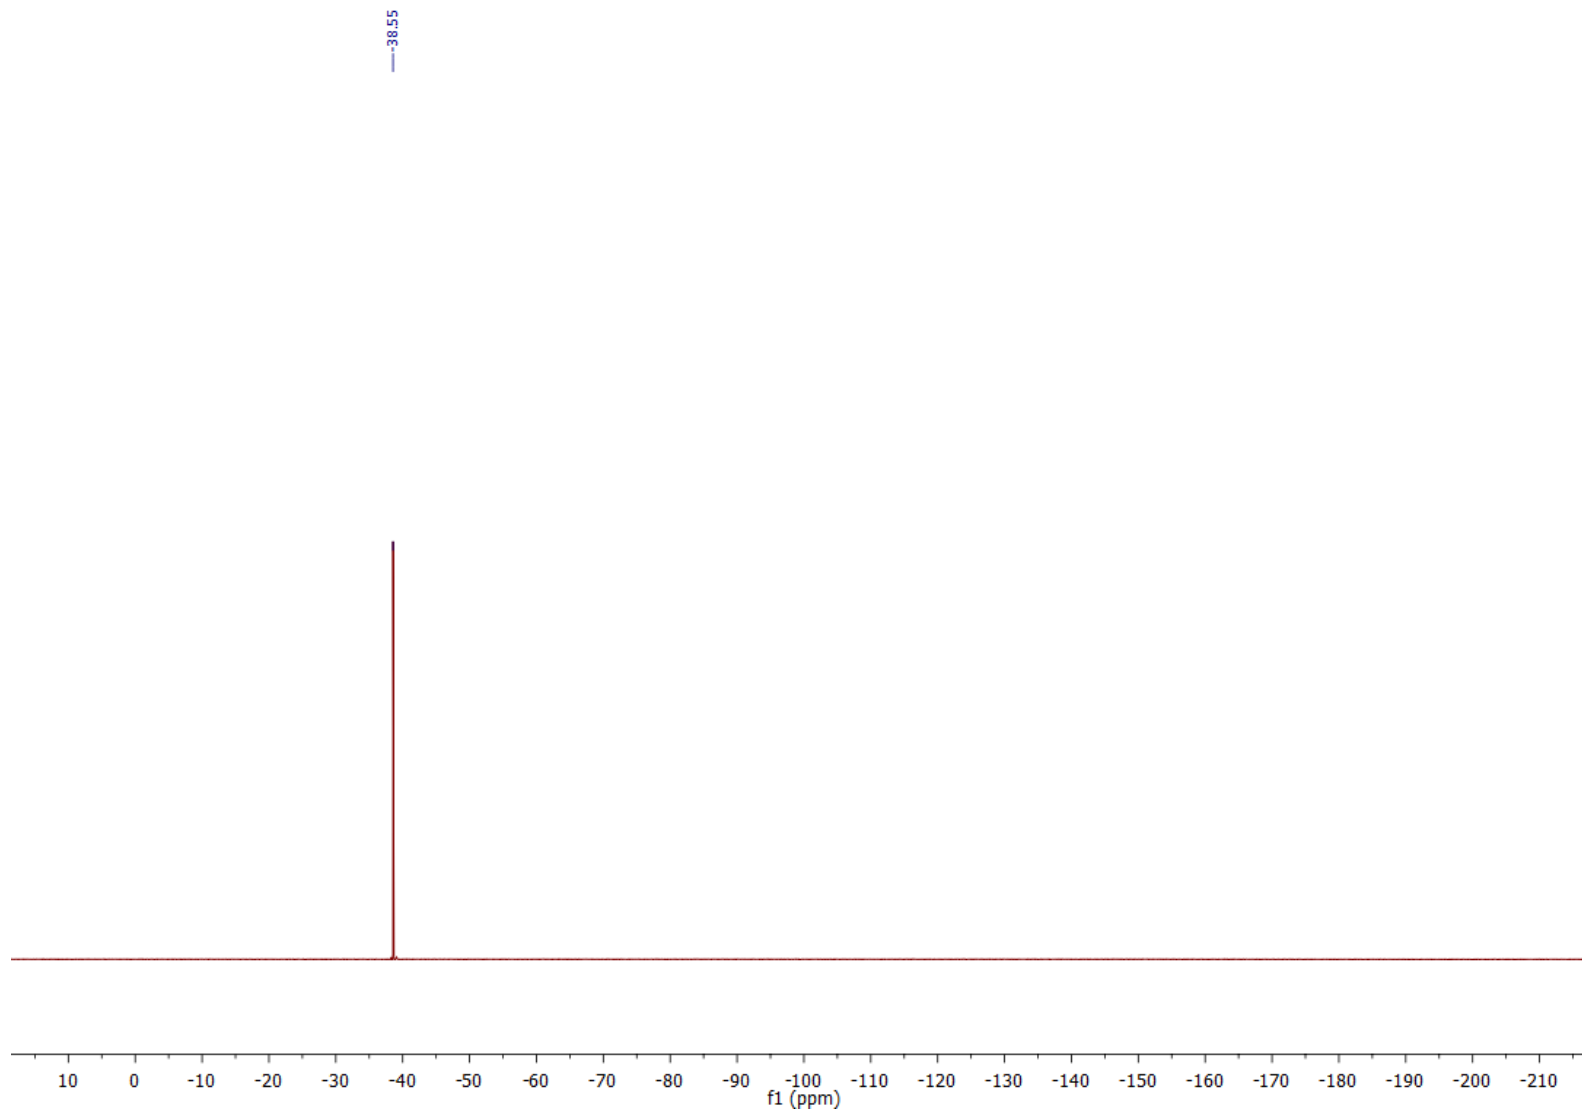

$^1\text{H}$  NMR ( $\text{CDCl}_3$ , 400 MHz). *N*-(4-((2-oxo-1-((trifluoromethyl)thio)undecyl)oxy)butyl)-*N*-(phenylsulfonyl)benzenesulfonamide (**8c**)

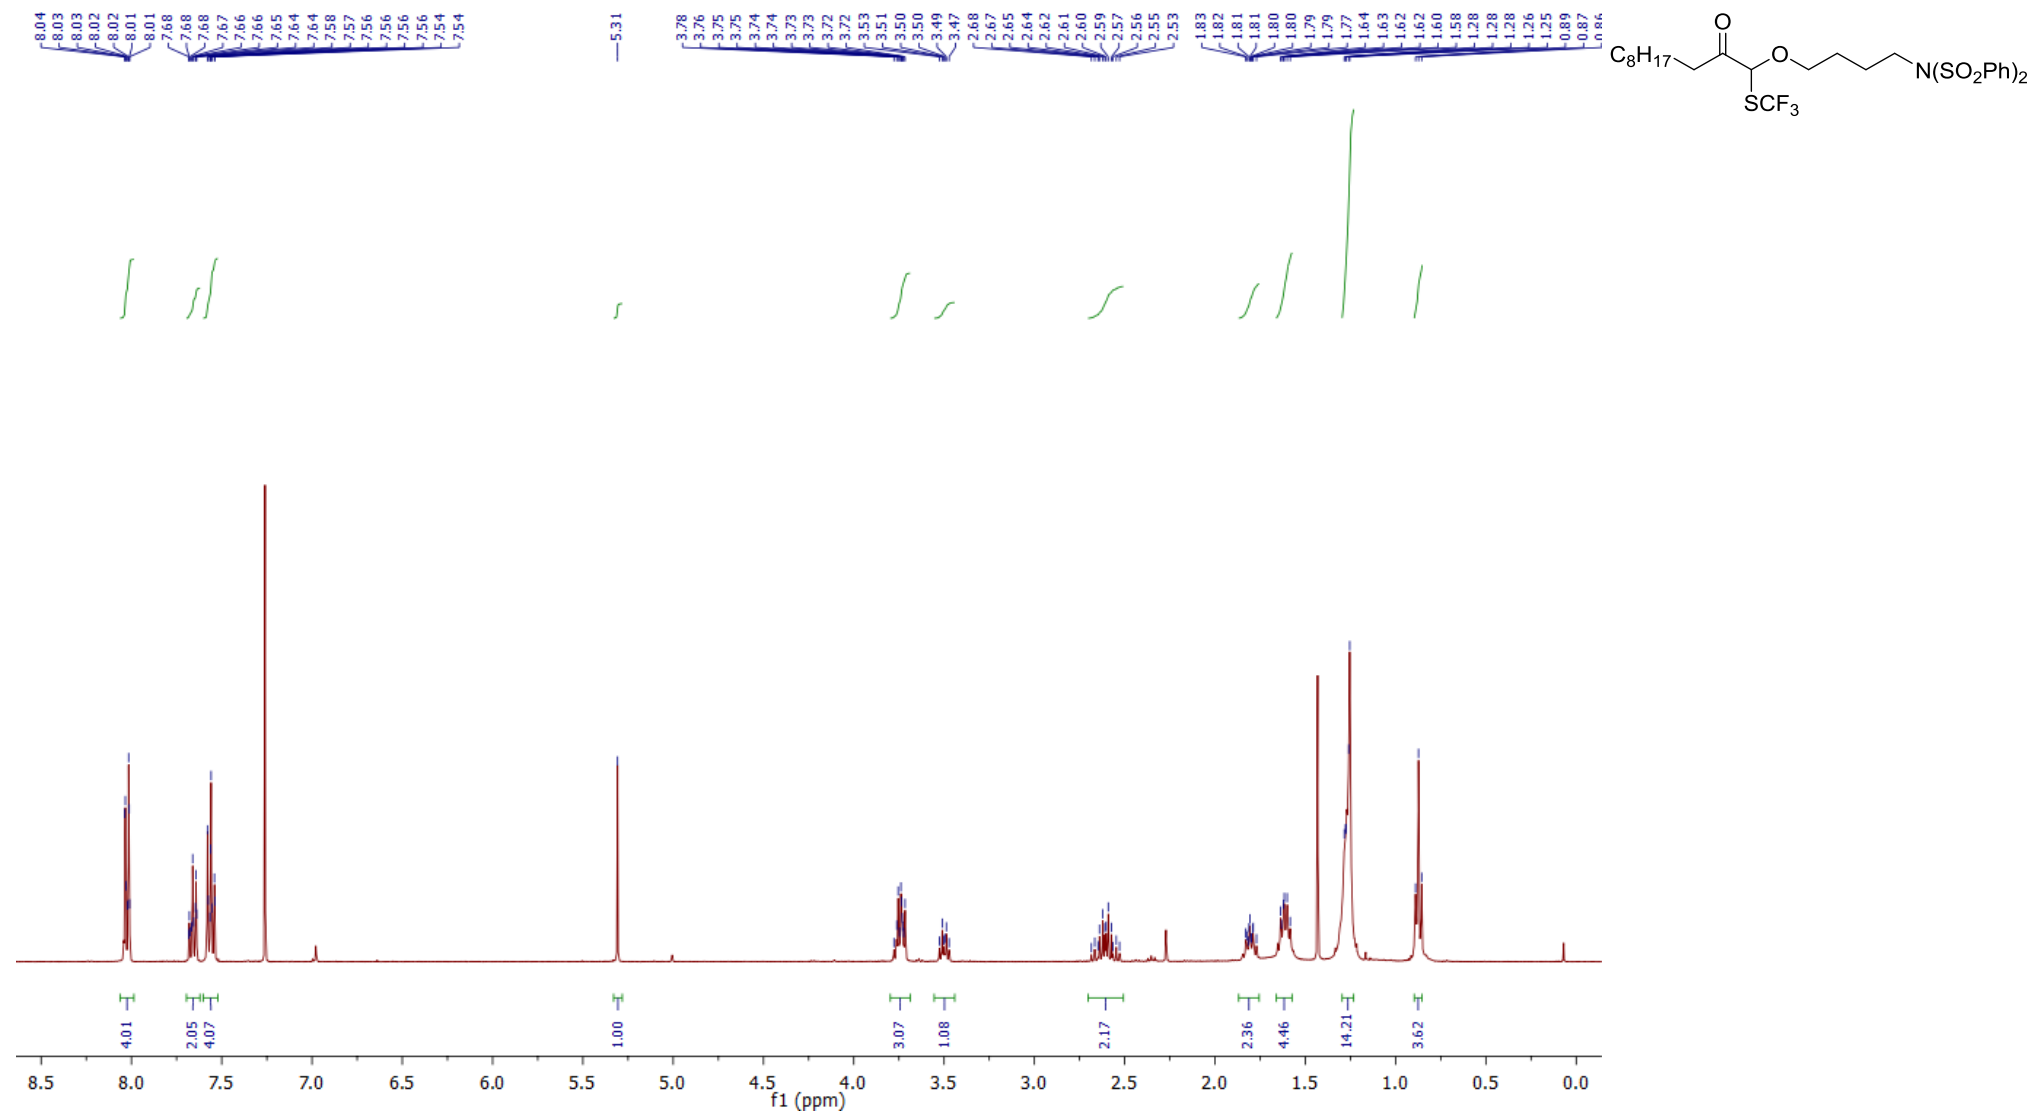



$^{13}\text{C}$  NMR ( $\text{CDCl}_3$ , 100 MHz). *N*-(4-((2-oxo-1-((trifluoromethyl)thio)undecyl)oxy)butyl)-*N*-(phenylsulfonyl)benzenesulfonamide (**8c**)

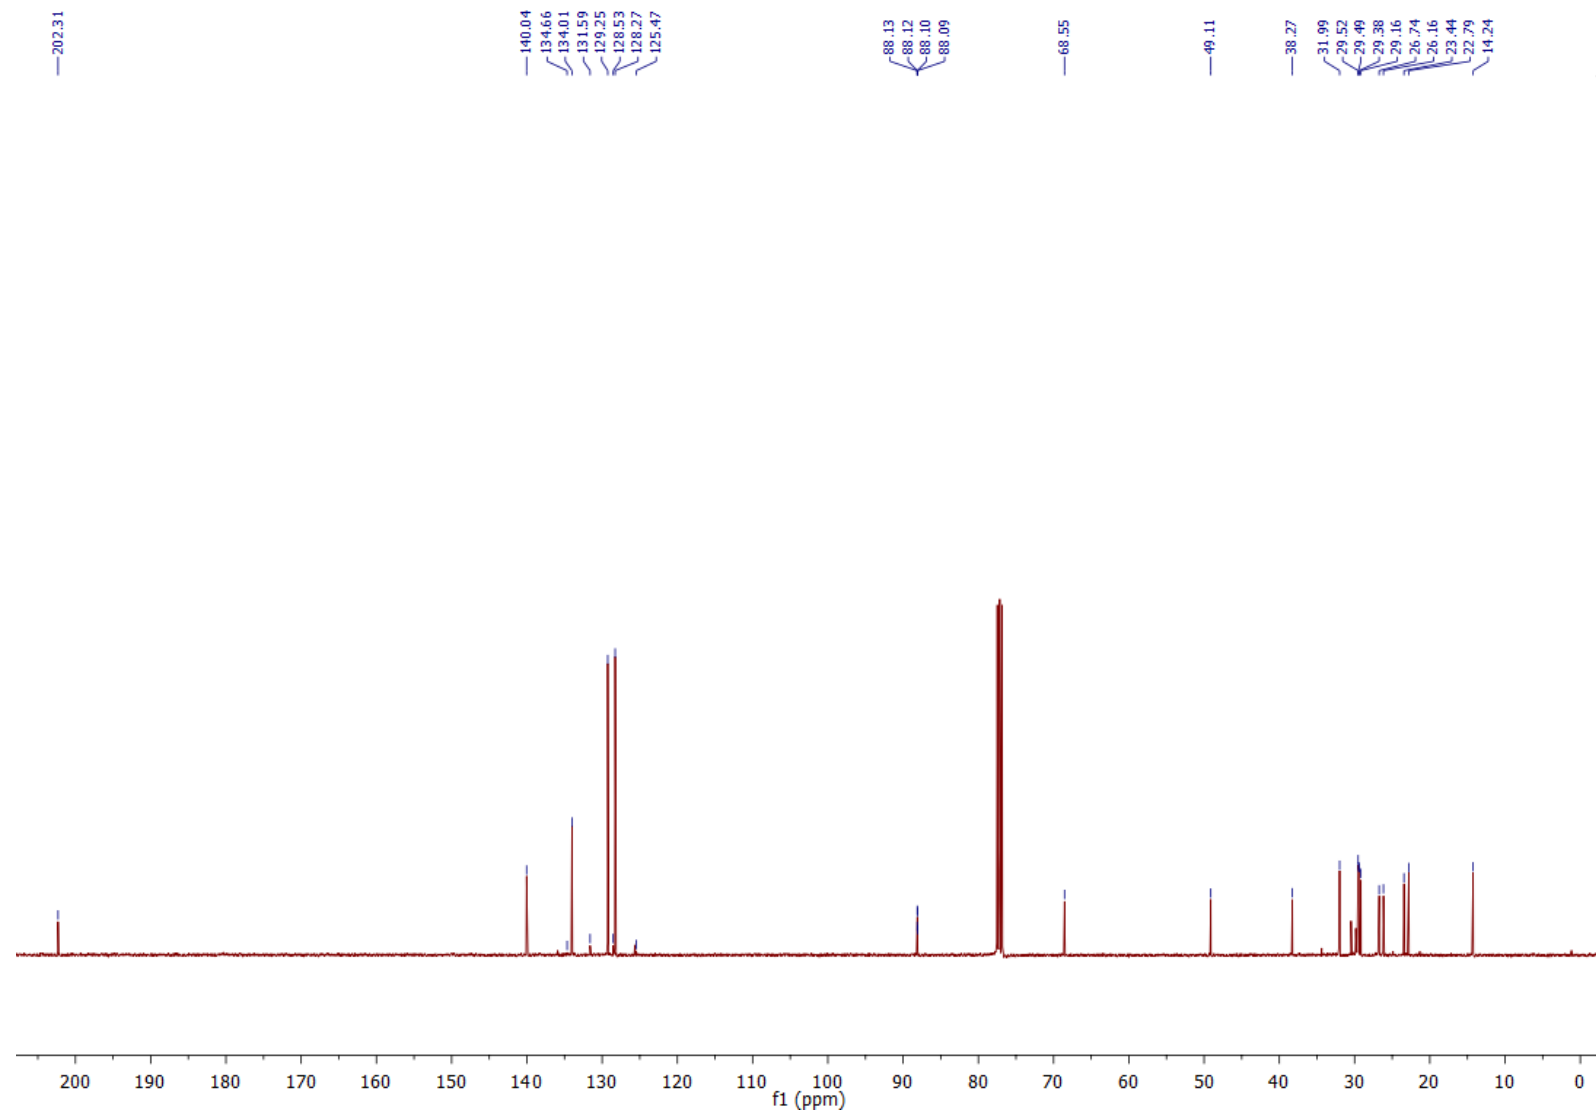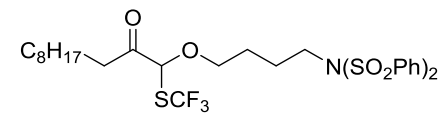

$^{19}\text{F}$  NMR ( $\text{CDCl}_3$ , 377 MHz). *N*-(4-((2-oxo-1-((trifluoromethyl)thio)undecyl)oxy)butyl)-*N*-(phenylsulfonyl)benzenesulfonamide (**8c**)

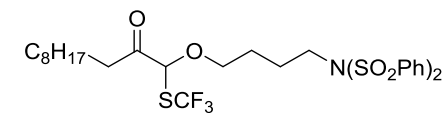

—37.61

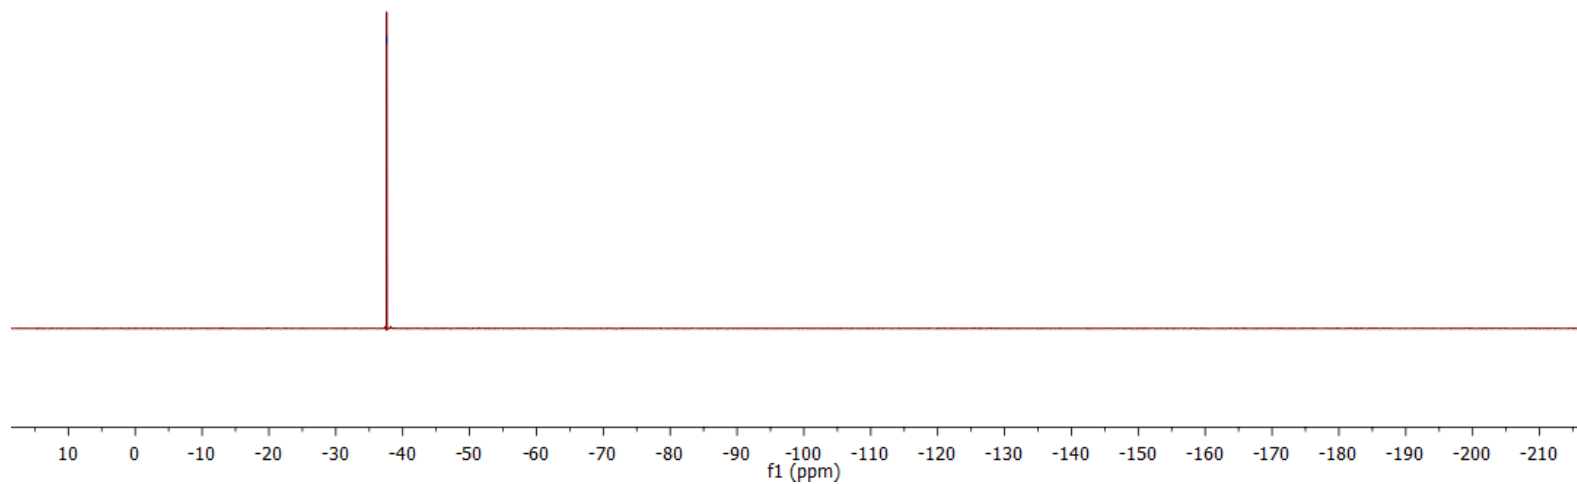

<sup>1</sup>H NMR (CDCl<sub>3</sub>, 400 MHz). Ethyl 2-(4-(*N*-(phenylsulfonyl)phenylsulfonamido)butoxy)-2-((trifluoromethyl)thio)acetate (**8d**)

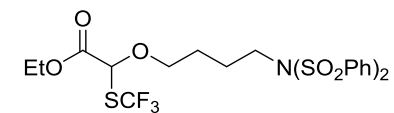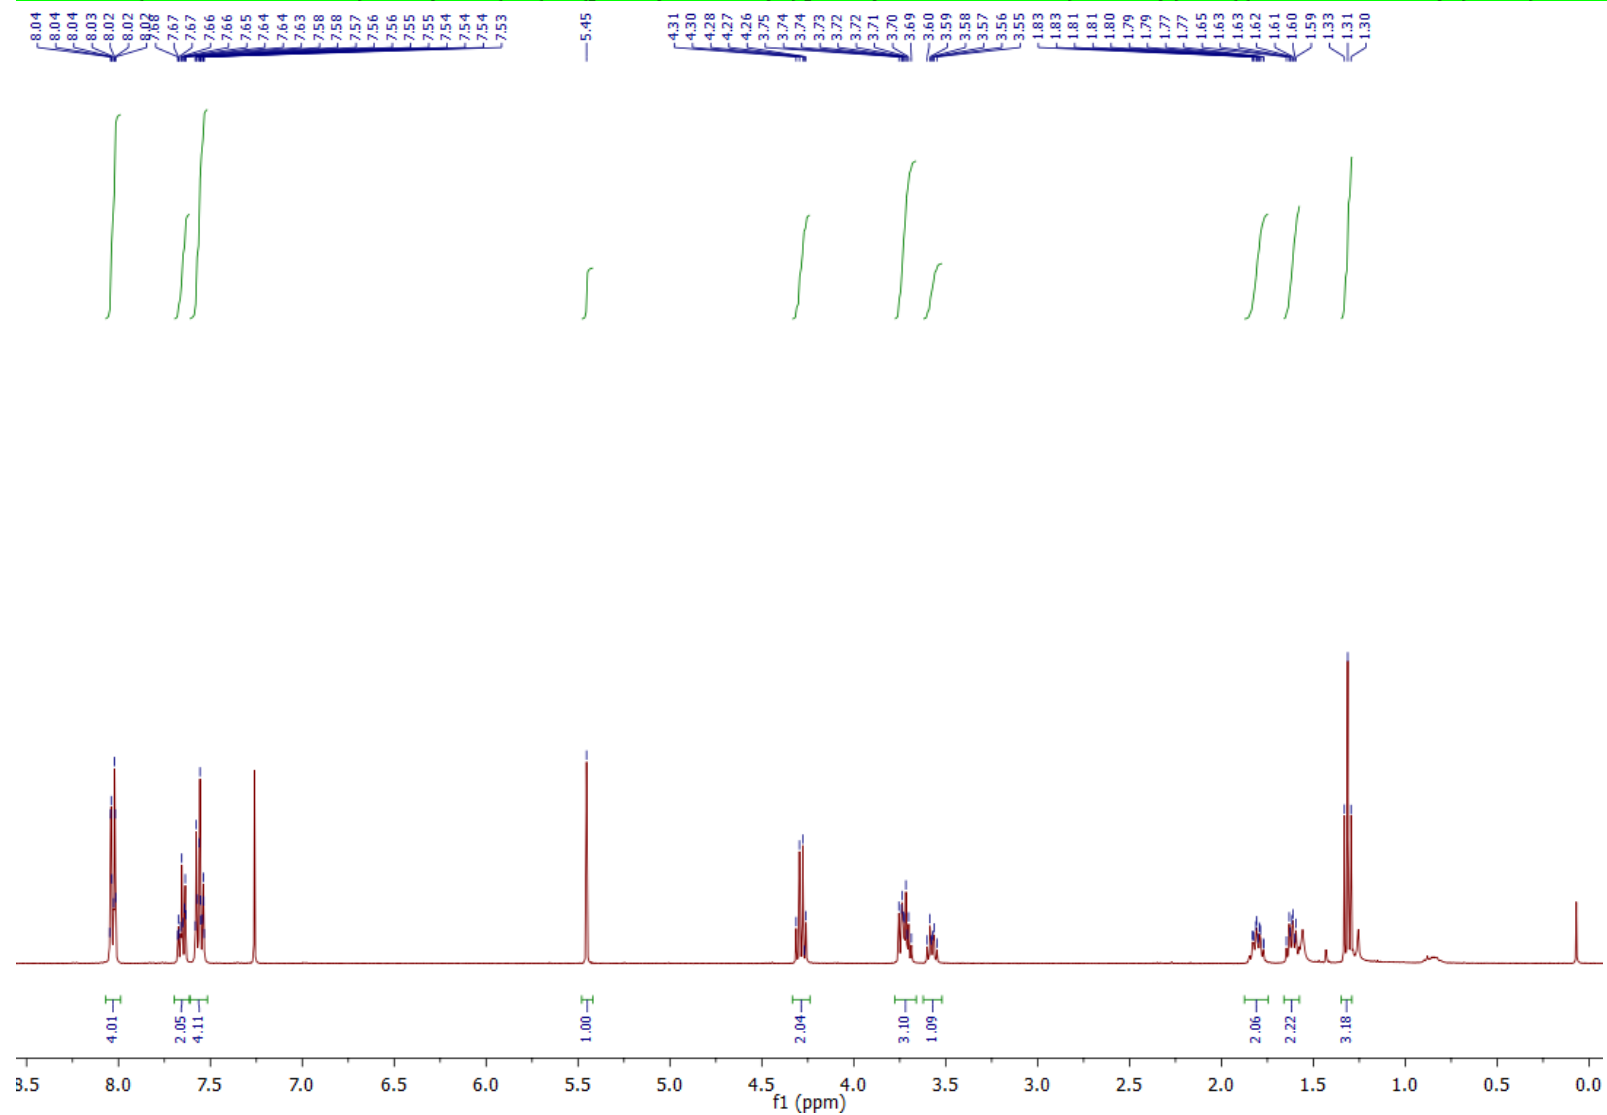

$^{13}\text{C}$  NMR ( $\text{CDCl}_3$ , 100 MHz). Ethyl 2-(4-(*N*-(phenylsulfonyl)phenylsulfonamido)butoxy)-2-((trifluoromethyl)thio)acetate (**8d**)

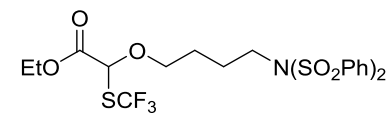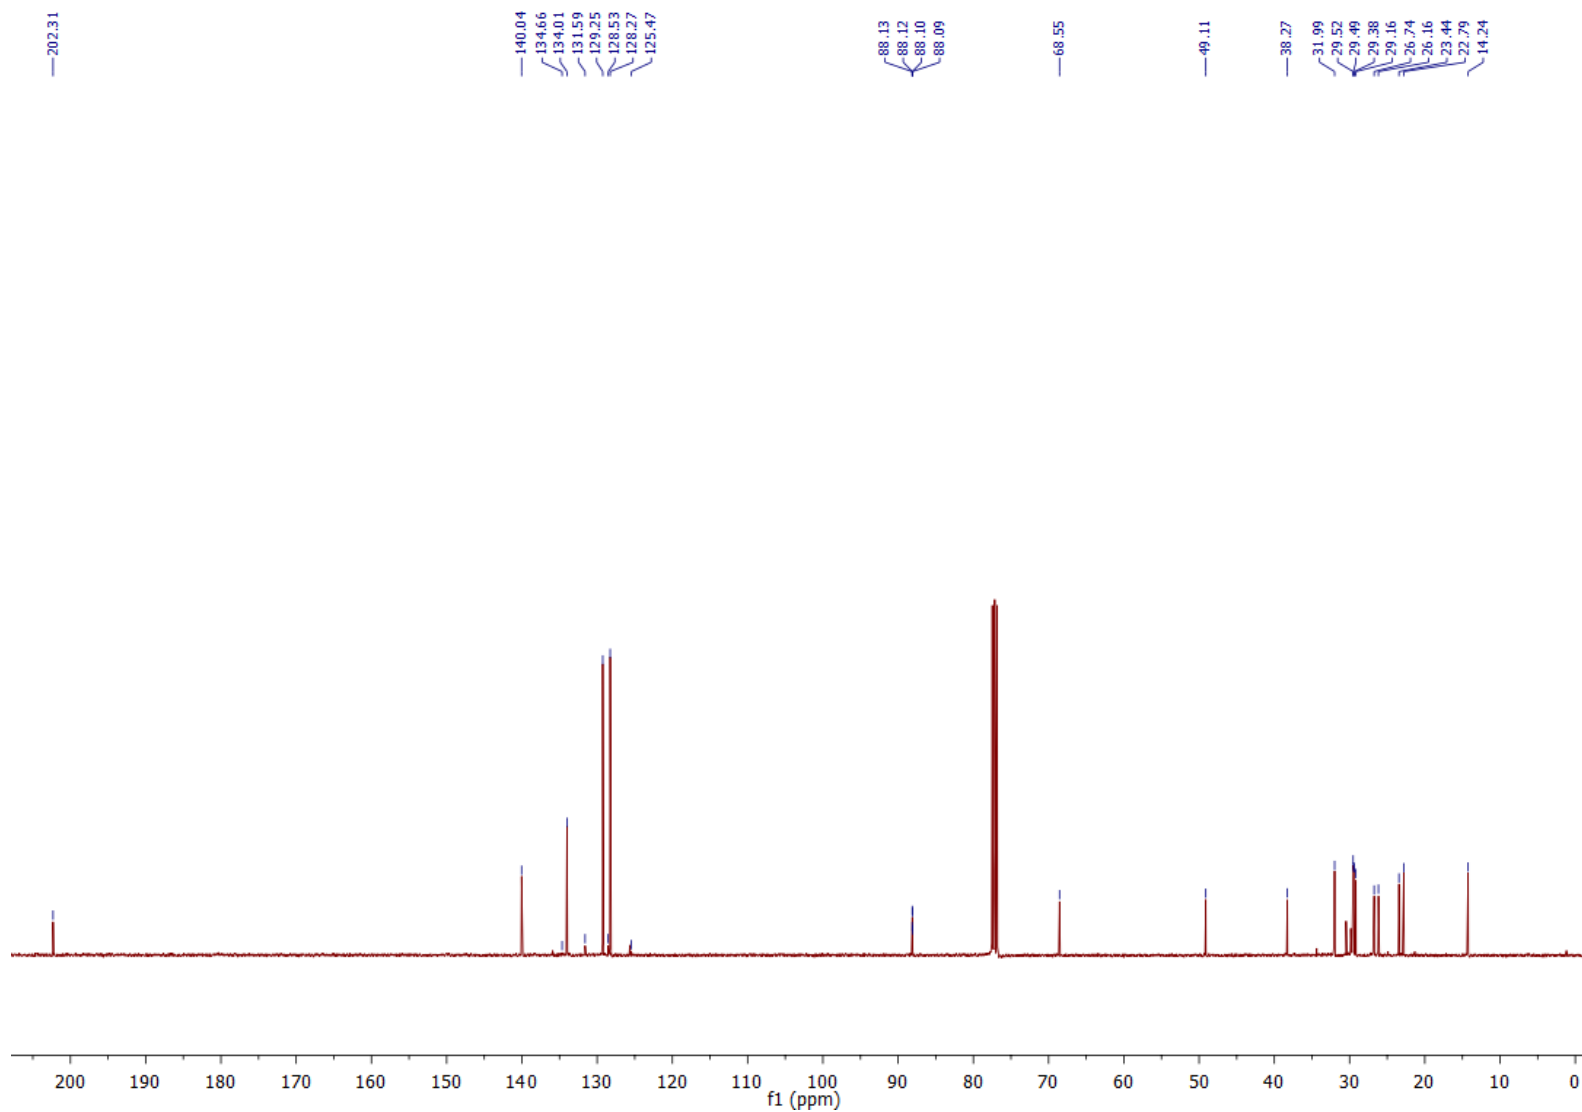

$^{19}\text{F}$  NMR ( $\text{CDCl}_3$ , 377 MHz). Ethyl 2-(4-(*N*-(phenylsulfonyl)phenylsulfonamido)butoxy)-2-((trifluoromethyl)thio)acetate (**8d**)

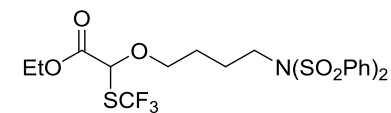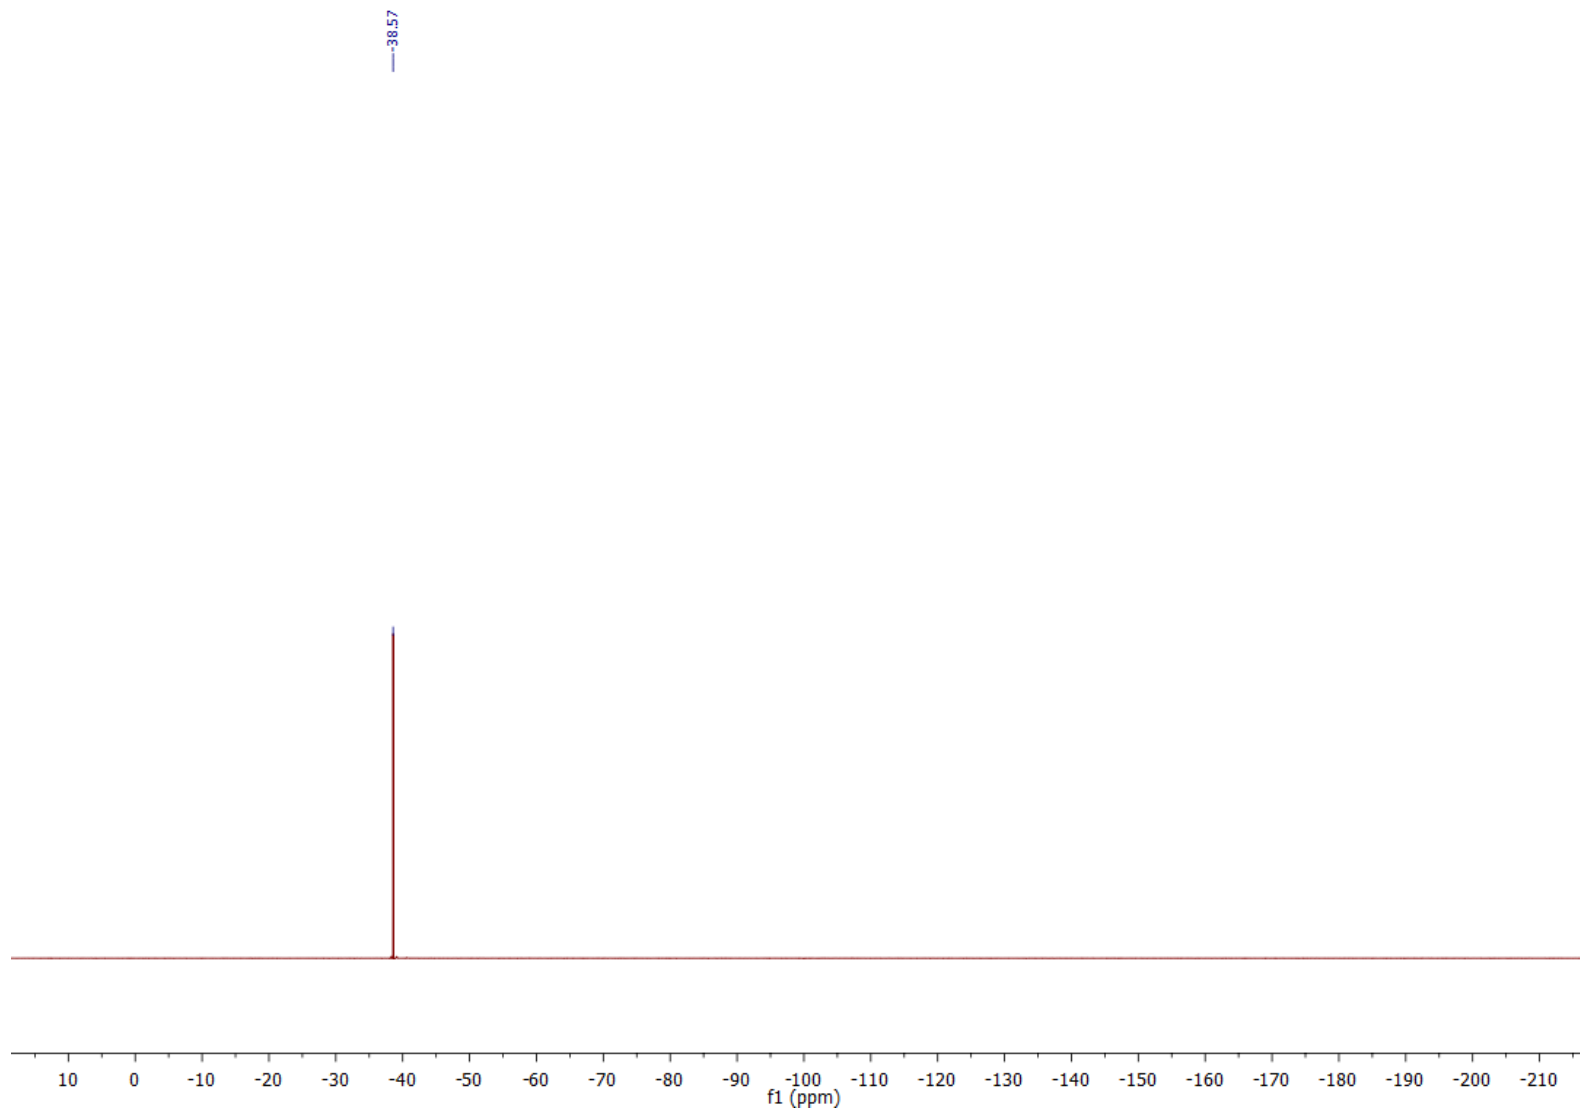

$^1\text{H}$  NMR ( $\text{CDCl}_3$ , 400 MHz).

*N*-(2-((2-oxo-2-phenyl-1-((trifluoromethyl)thio)ethoxy)methyl)benzyl)-*N*-(phenylsulfonyl)benzenesulfonamide (**8e**)

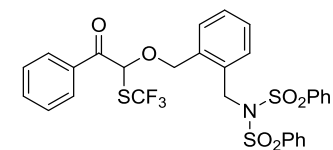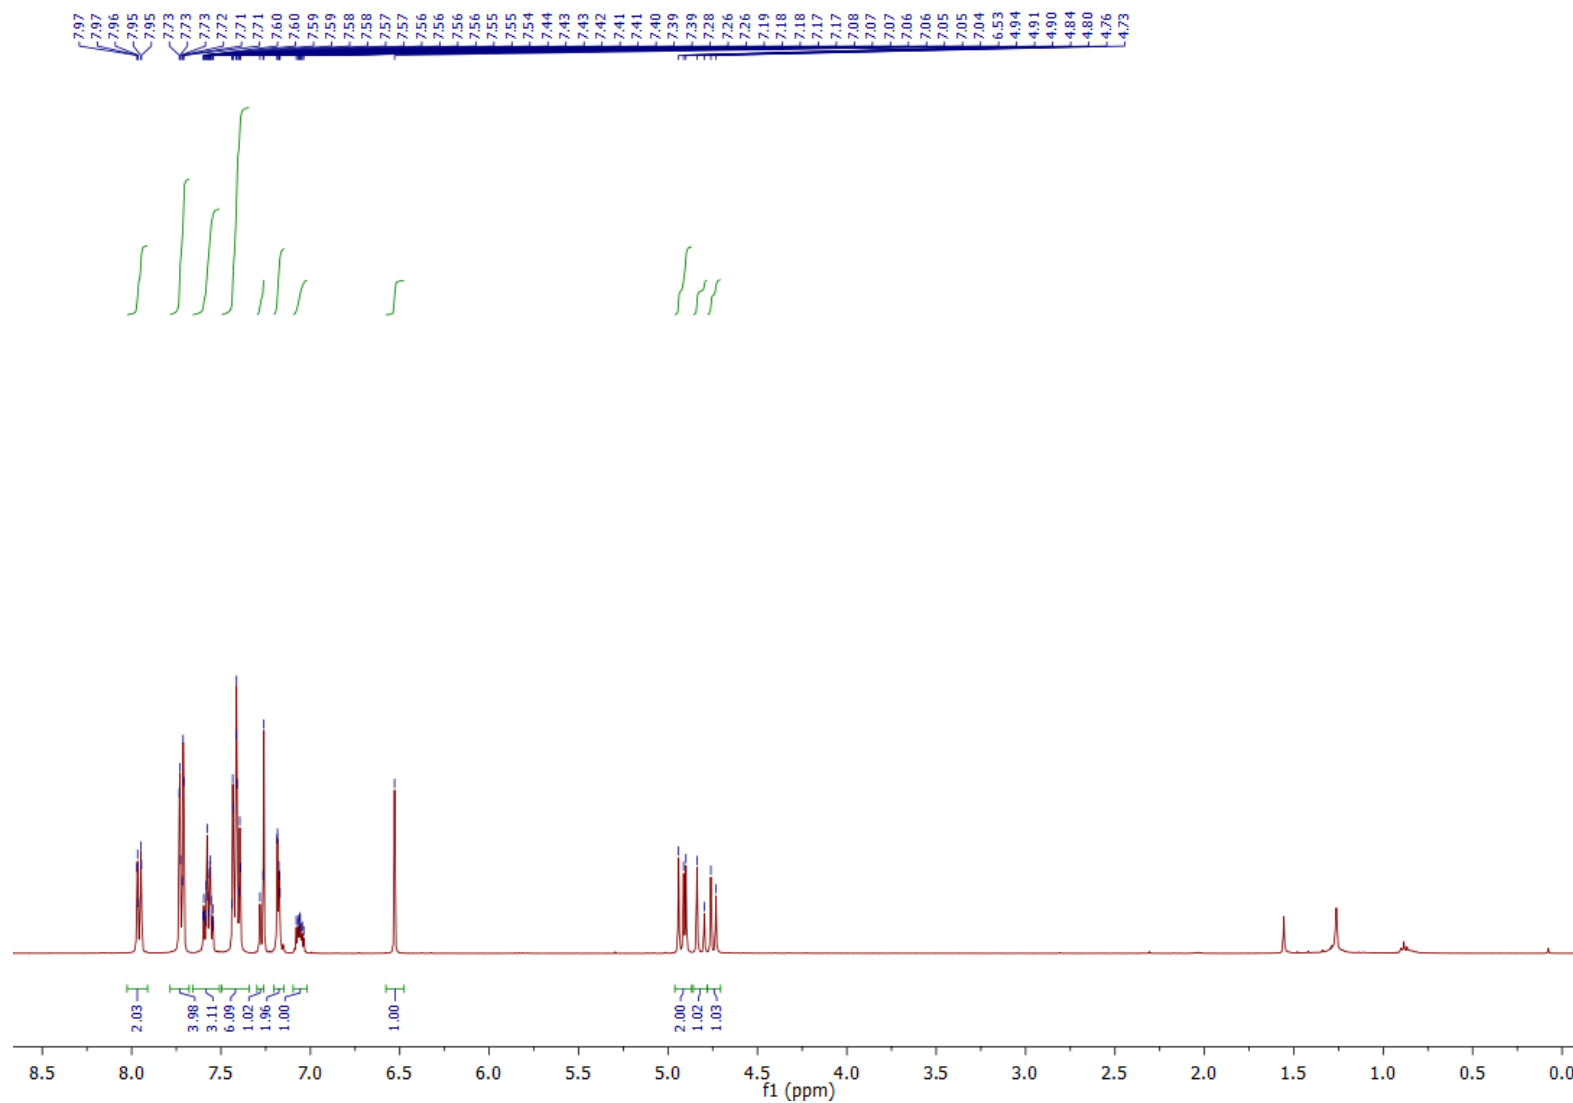

$^{13}\text{C}$  NMR ( $\text{CDCl}_3$ , 100 MHz).

*N*-(2-((2-oxo-2-phenyl-1-((trifluoromethyl)thio)ethoxy)methyl)benzyl)-*N*-(phenylsulfonyl)benzenesulfonamide (**8e**)

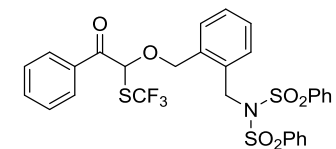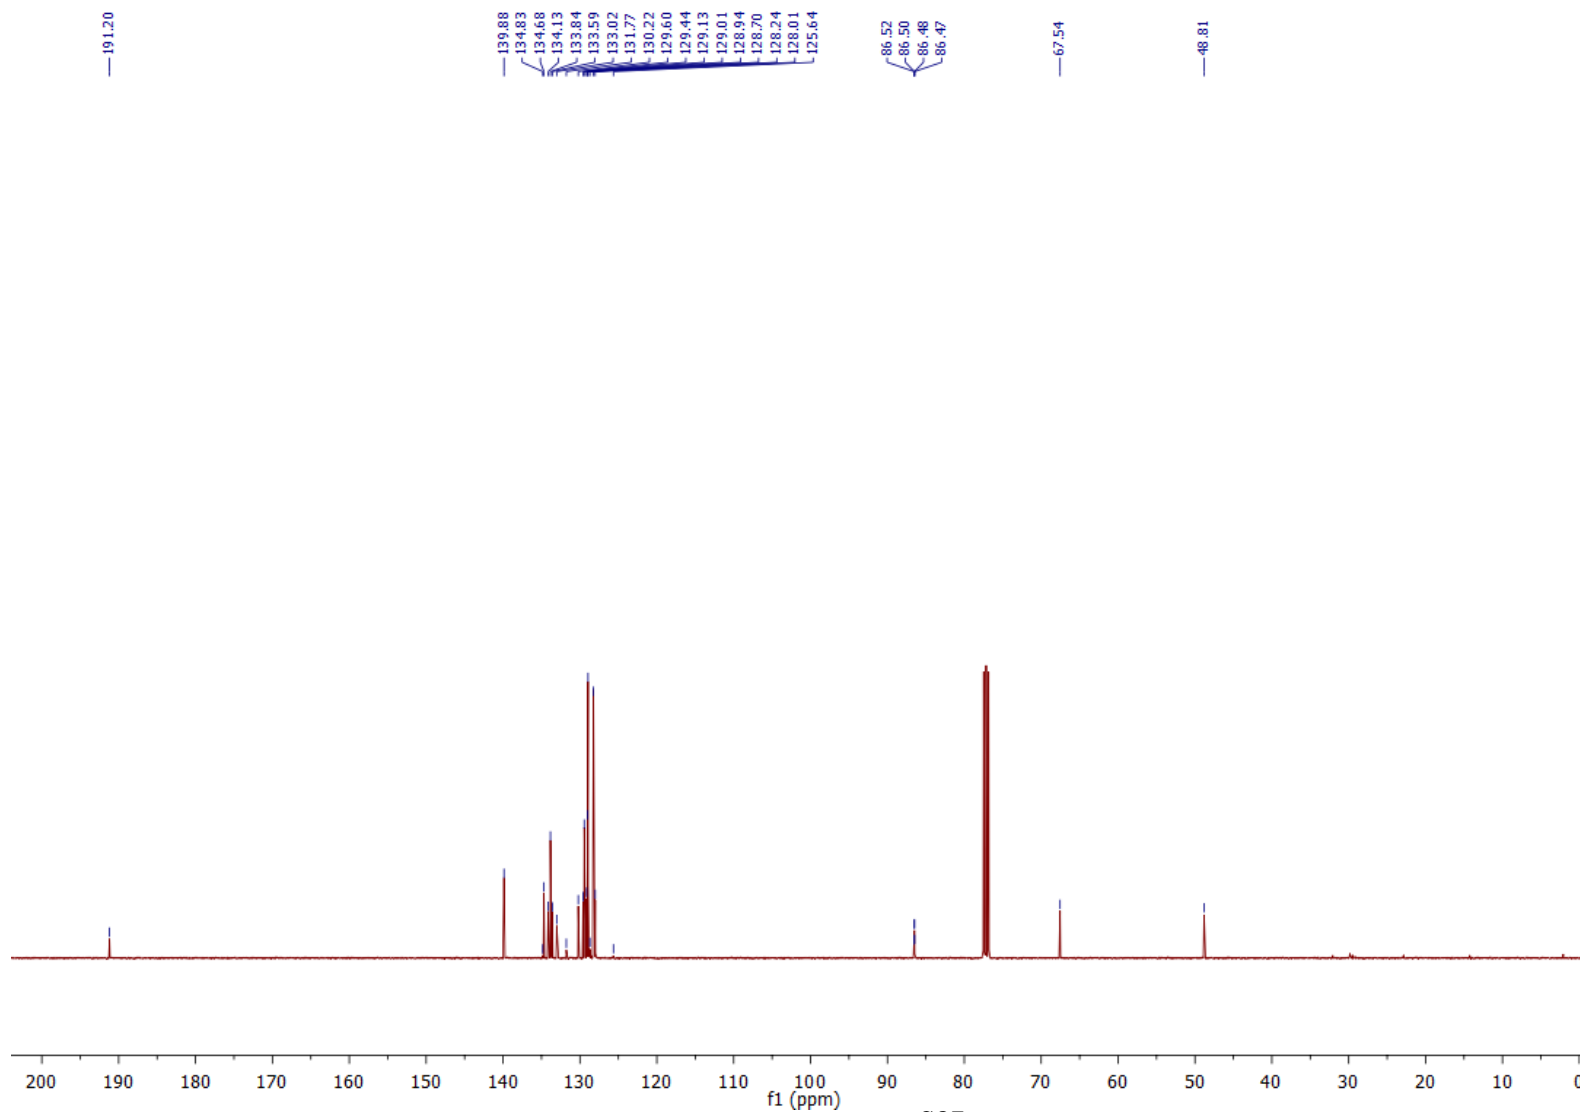

$^{19}\text{F}$  NMR ( $\text{CDCl}_3$ , 377 MHz).

*N*-(2-((2-oxo-2-phenyl-1-((trifluoromethyl)thio)ethoxy)methyl)benzyl)-*N*-(phenylsulfonyl)benzenesulfonamide (**8e**)

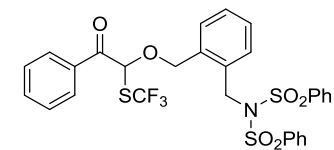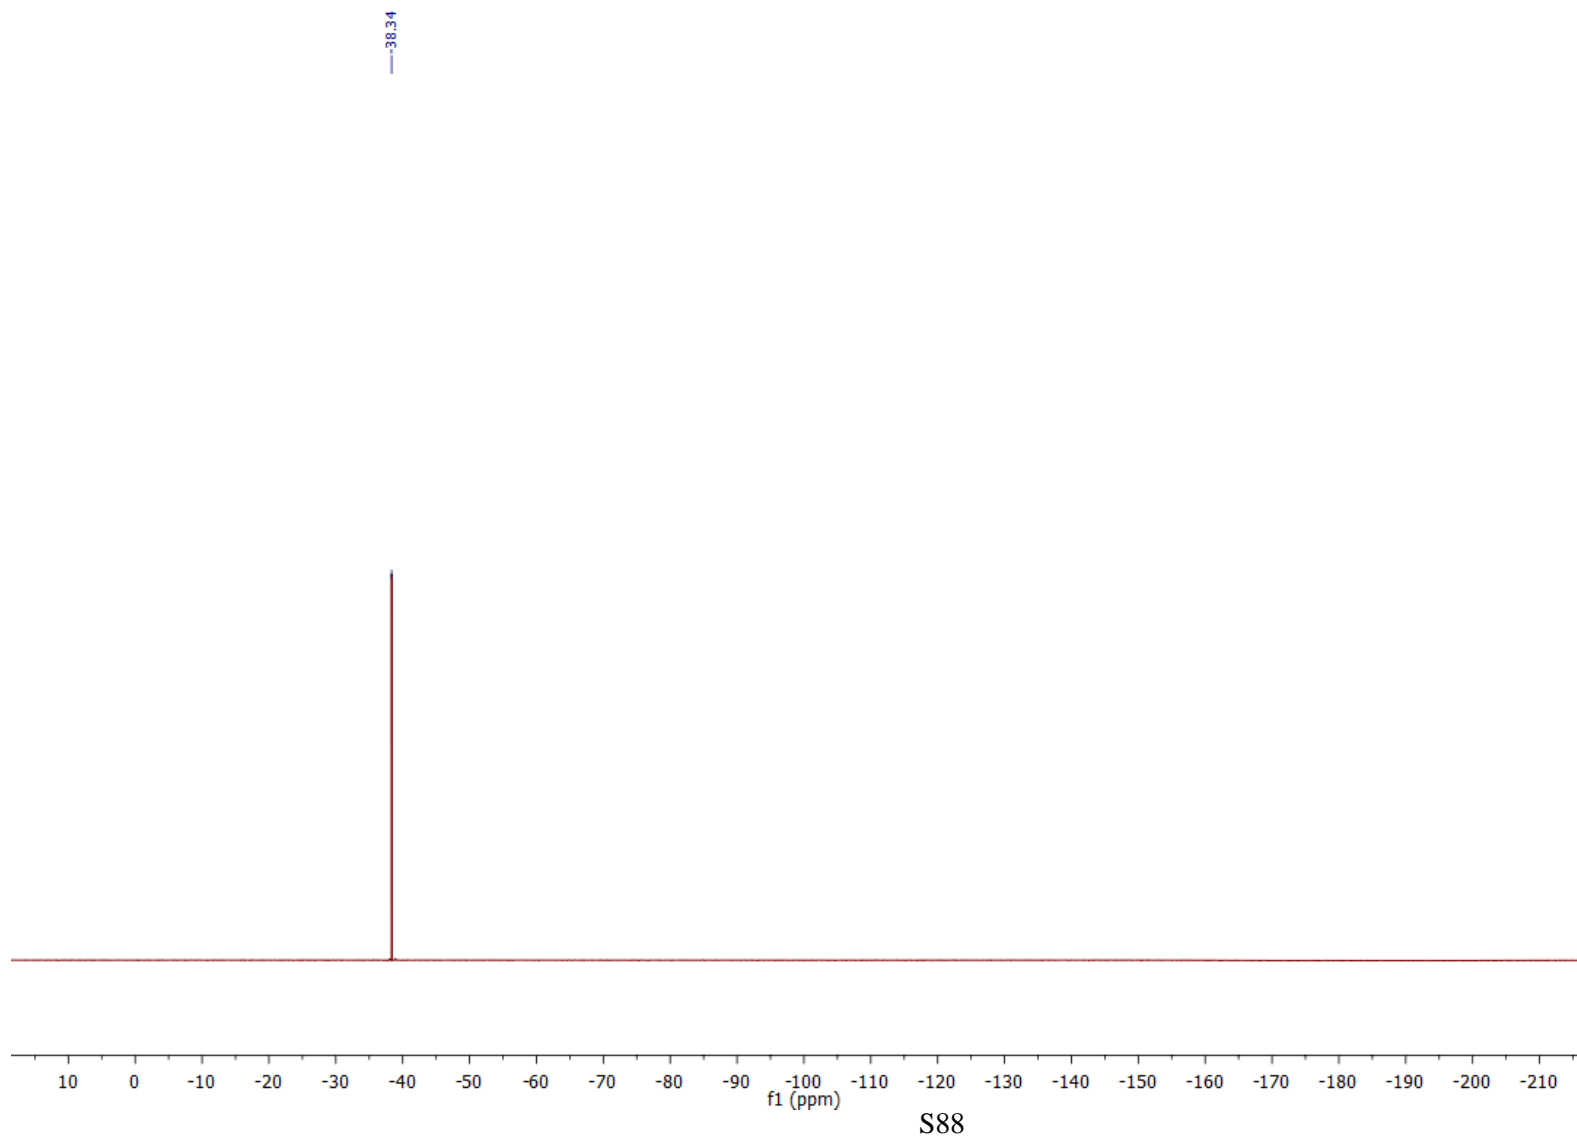



<sup>1</sup>H NMR (CDCl<sub>3</sub>, 400 MHz).

*N*-(2-(2-(2-oxo-2-phenyl-1-((trifluoromethyl)thio)ethoxy)ethoxy)ethyl)-*N*-(phenylsulfonyl)benzenesulfonamide (**8f**)

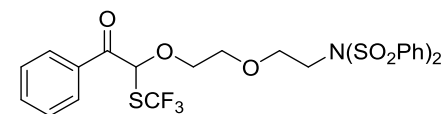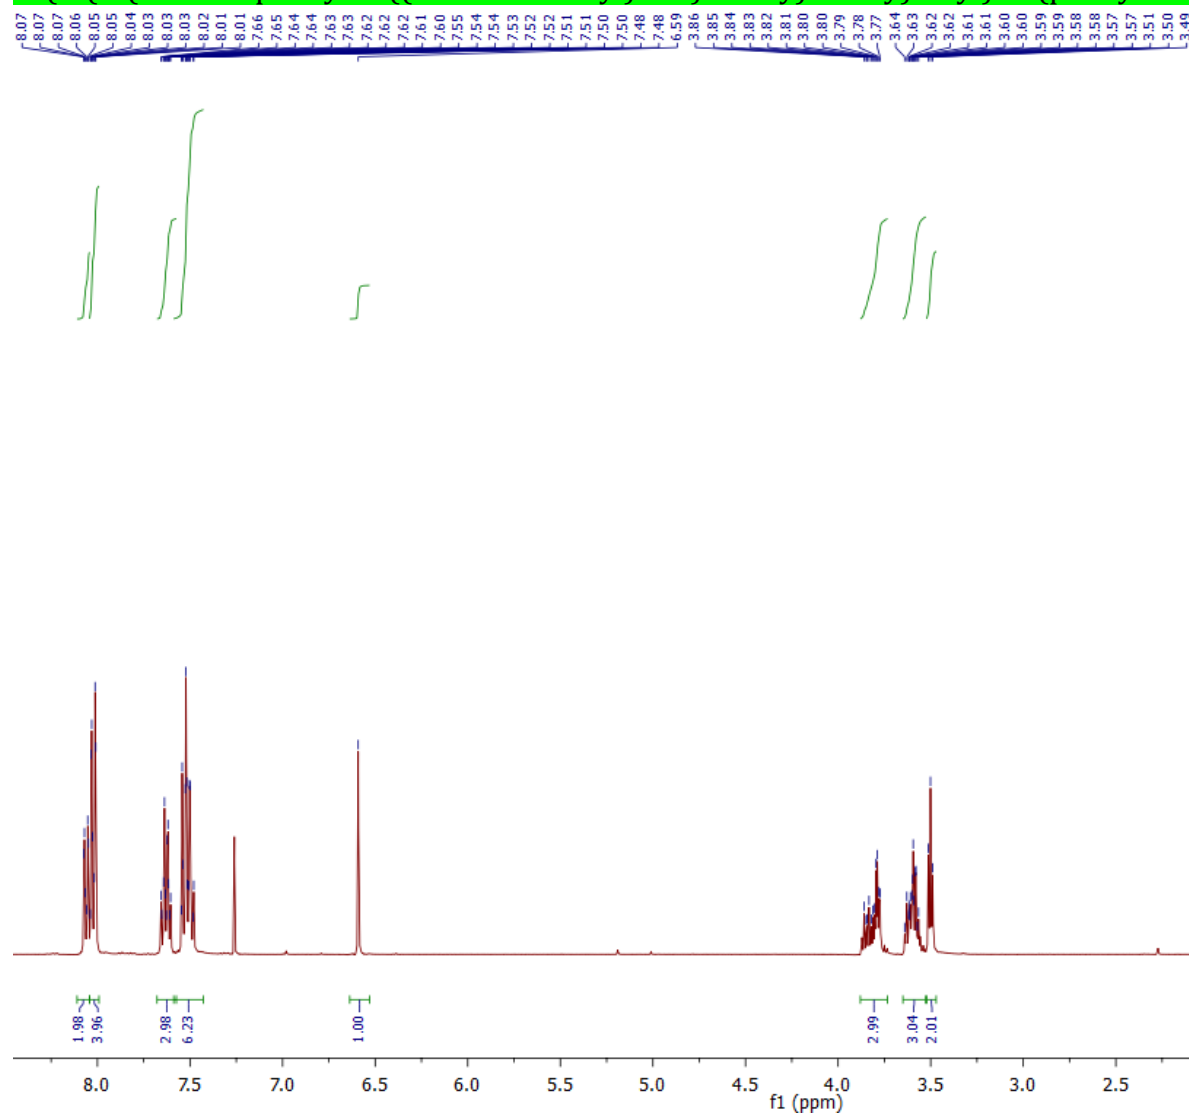

$^{13}\text{C}$  NMR ( $\text{CDCl}_3$ , 100 MHz).

*N*-(2-(2-(2-oxo-2-phenyl-1-((trifluoromethyl)thio)ethoxy)ethoxy)ethyl)-*N*-(phenylsulfonyl)benzenesulfonamide (**8f**)

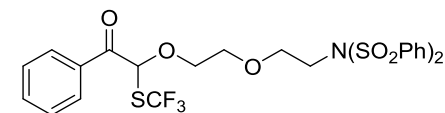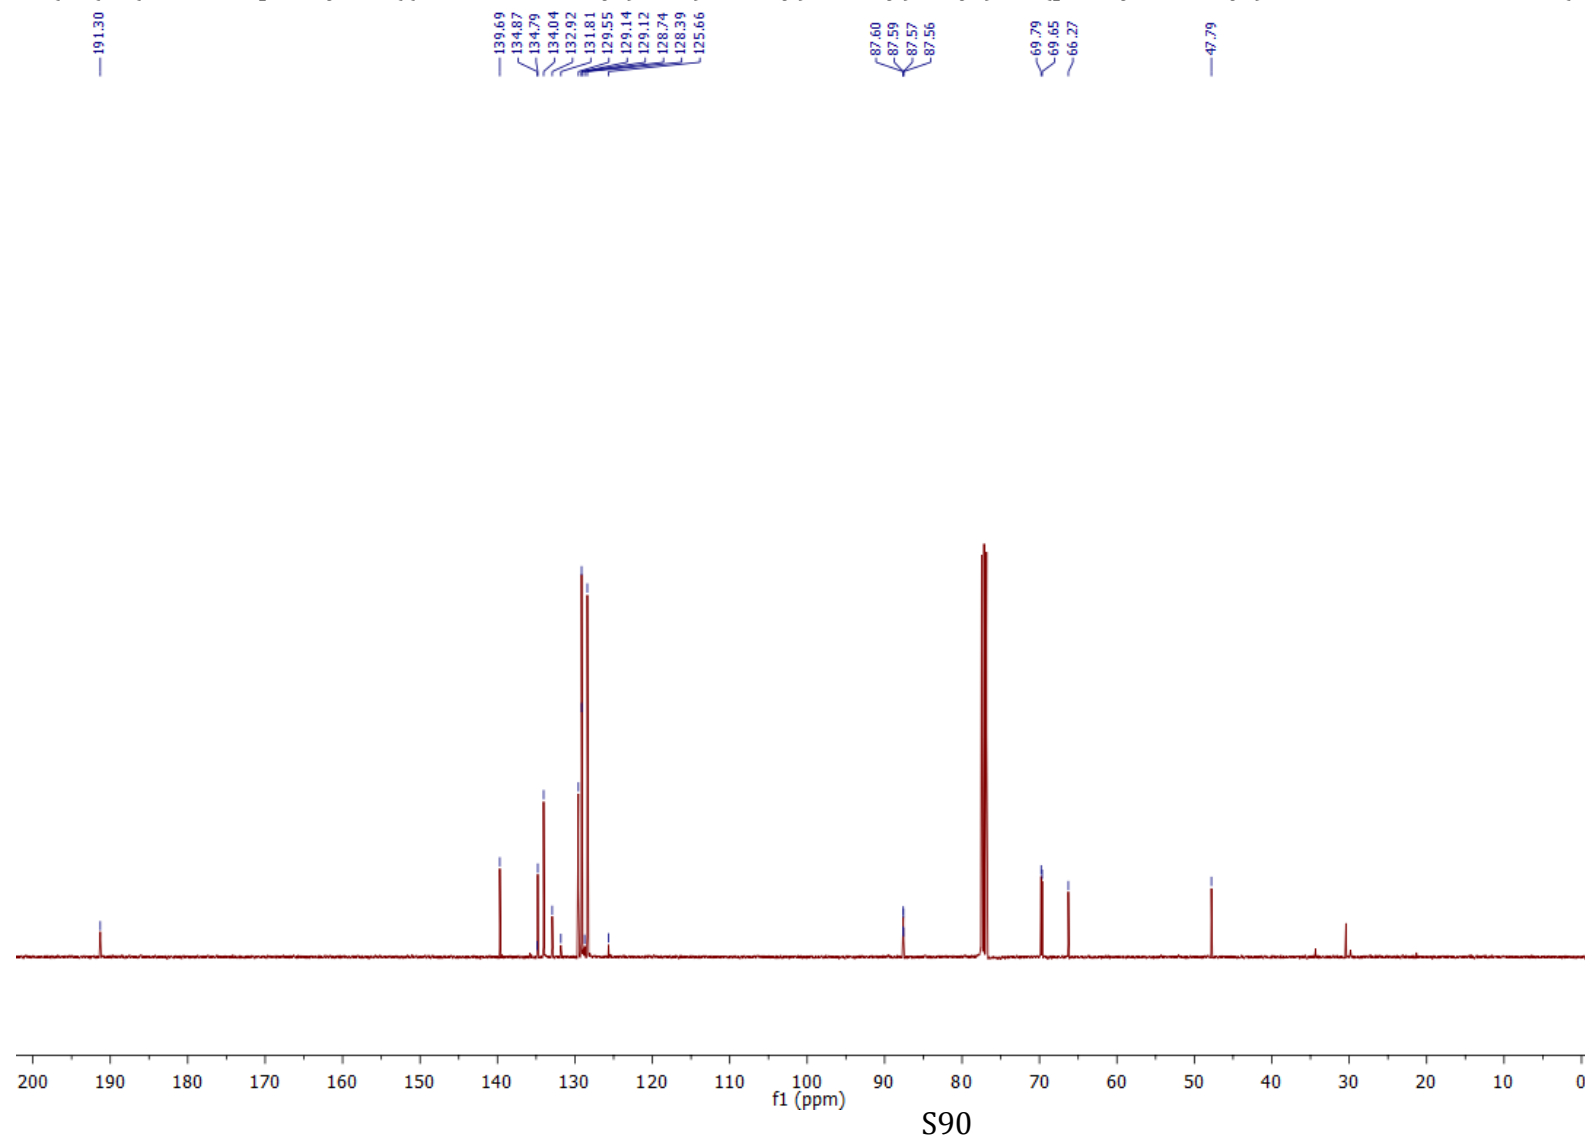

$^{19}\text{F}$  NMR ( $\text{CDCl}_3$ , 377 MHz).

*N*-(2-(2-(2-oxo-2-phenyl-1-((trifluoromethyl)thio)ethoxy)ethoxy)ethyl)-*N*-(phenylsulfonyl)benzenesulfonamide (**8f**)

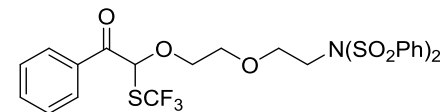

—38.23

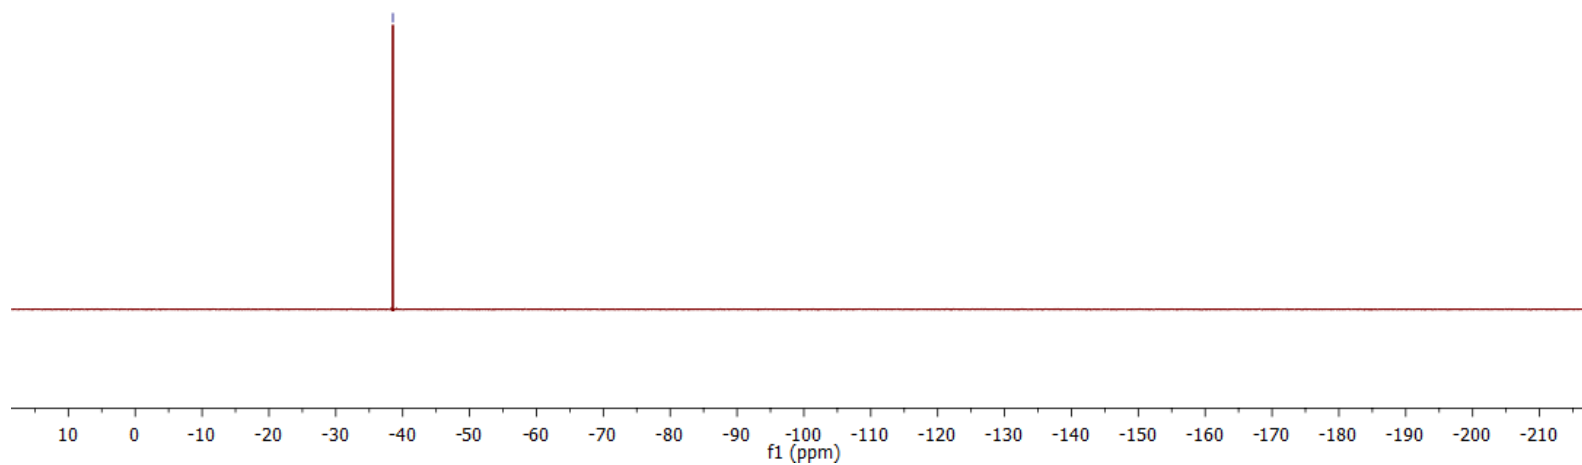

S91

$^1\text{H}$  NMR ( $\text{CDCl}_3$ , 400 MHz). *N*-(phenylsulfonyl)-*N*-(2-((trifluoromethyl)thio)cyclohexyl)benzenesulfonamide (**13**)

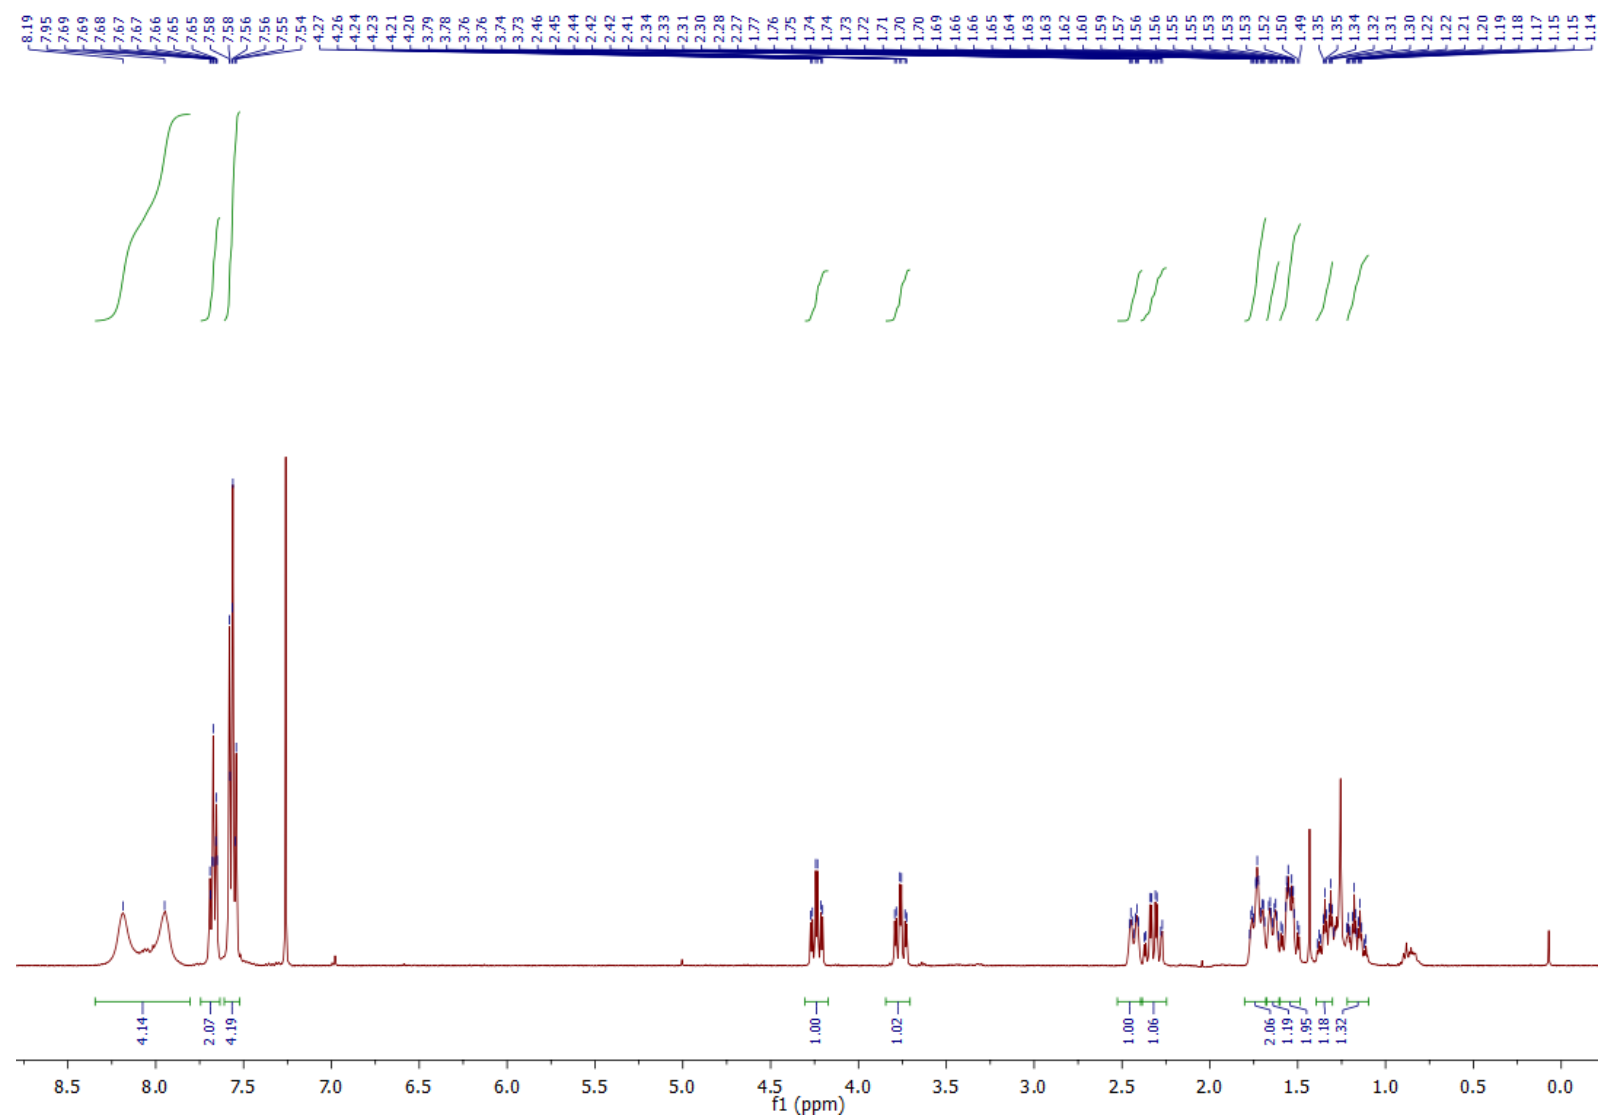

$^{13}\text{C}$  NMR ( $\text{CDCl}_3$ , 100 MHz). *N*-(phenylsulfonyl)-*N*-(2-((trifluoromethyl)thio)cyclohexyl)benzenesulfonamide (**13**)

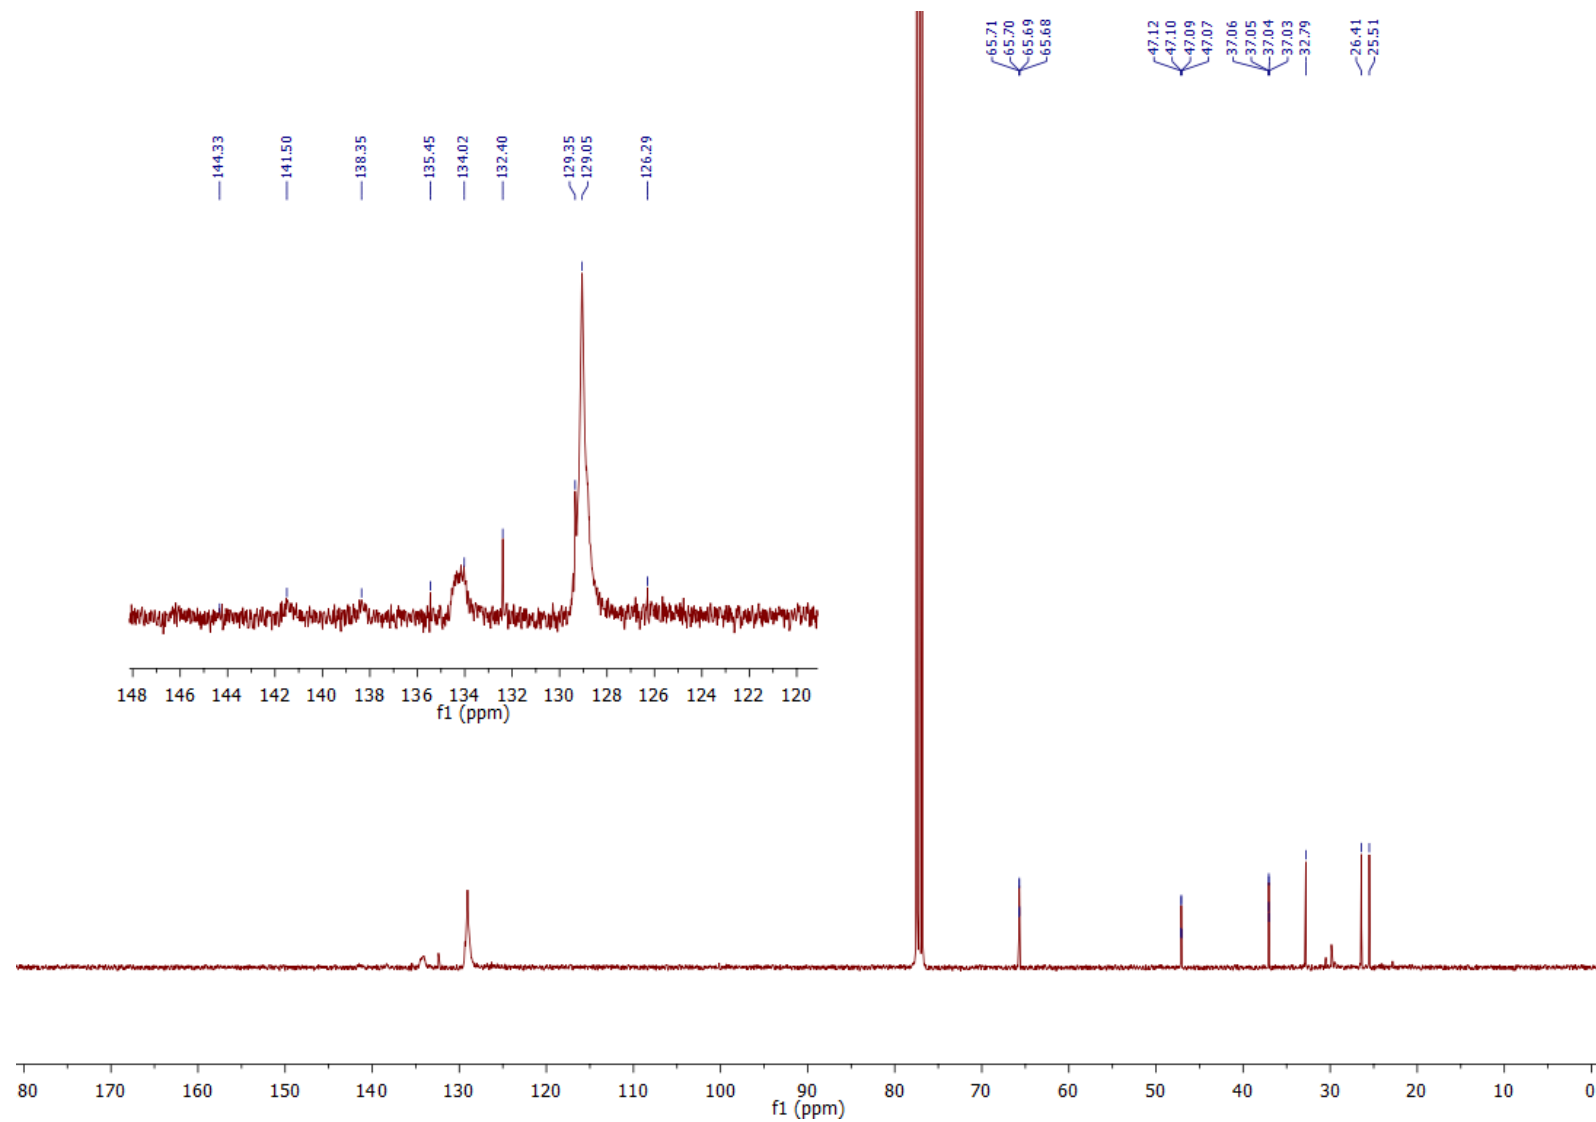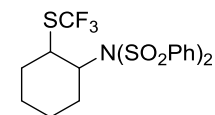

$^{19}\text{F}$  NMR ( $\text{CDCl}_3$ , 377 MHz). *N*-(phenylsulfonyl)-*N*-(2-((trifluoromethyl)thio)cyclohexyl)benzenesulfonamide (**13**)

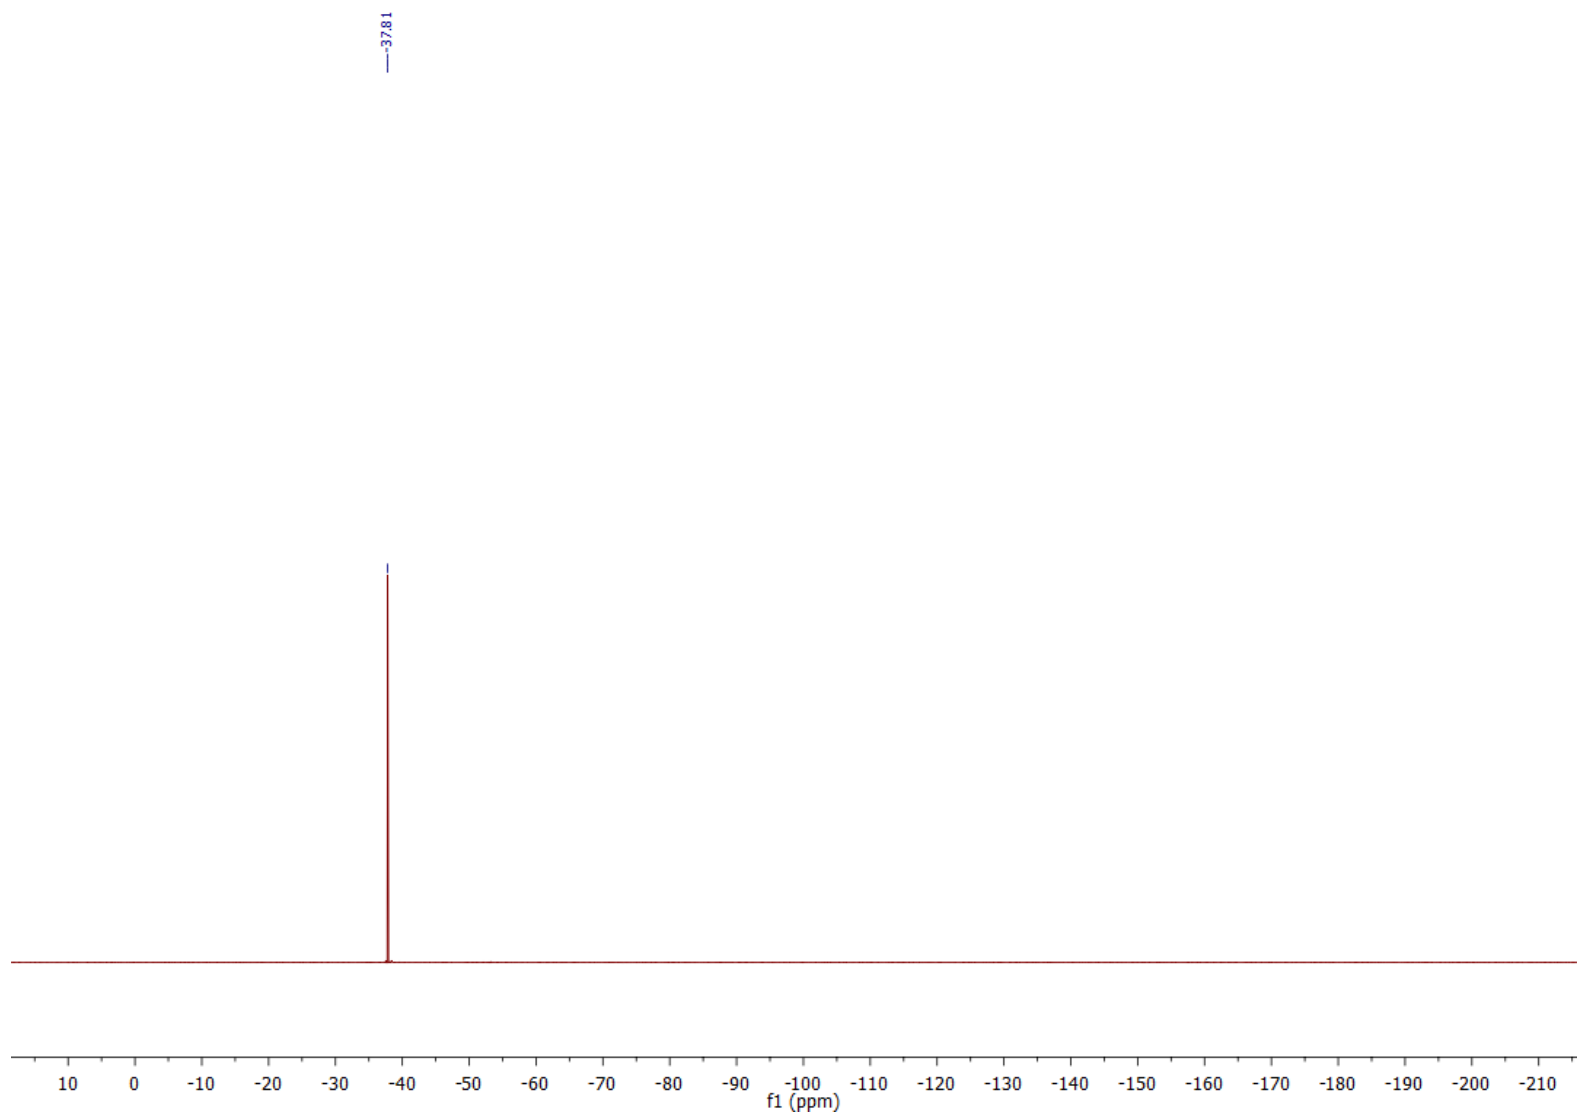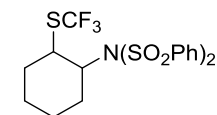

## References:

1. Martin, L. J.; Marzinzik, A. L.; Ley, S. V.; Baxendale, I. R., *Org. Lett.* **2011**, *13*, 320-323.
2. Das, A.; Wang, D.; Belhomme, M.-C.; Szabó, K. J., *Org. Lett.* **2015**, *17*, 4754-4757.
3. Lall, M. S.; Ramtohul, Y. K.; James, M. N. G.; Vederas, J. C., *J. Org. Chem.* **2002**, *67*, 1536-1547.
4. Zhang, P.; Li, M.; Xue, X.-S.; Xu, C.; Zhao, Q.; Liu, Y.; Wang, H.; Guo, Y.; Lu, L.; Shen, Q., *J. Org. Chem.* **2016**, *81*, 7486-7509.
5. Martin, M. G.; Ganem, B., *Tetrahedron Lett.* **1984**, *25*, 251-254.
6. Chen, G.; Song, J.; Yu, Y.; Luo, X.; Li, C.; Huang, X., *Chem. Sci.* **2016**, *7*, 1786-1790.
7. Huang, J.; Li, L.; Chen, H.; Xiao, T.; He, Y.; Zhou, L., *Org. Chem. Front.* **2017**, *4*, 529-533.
8. Werlé, C.; Goddard, R.; Philipps, P.; Farès, C.; Fürstner, A., *J. Am. Chem. Soc.* **2016**, *138*, 3797-3805.
9. Doyle, M. P., *Acc. Chem. Res.* **1986**, *19*, 348-356.
10. Doyle, M. P.; Duffy, R.; Ratnikov, M.; Zhou, L., *Chem. Rev.* **2010**, *110*, 704-724.
11. Xiao, Q.; Zhang, Y.; Wang, J., *Acc. Chem. Res.* **2013**, *46*, 236-247.
12. Xia, Y.; Zhang, Y.; Wang, J., *ACS Catal.* **2013**, *3*, 2586-2598.
13. Padwa, A.; Hornbuckle, S. F., *Chem. Rev.* **1991**, *91*, 263-309.
14. Guo, X.; Hu, W., *Acc. Chem. Res.* **2013**, *46*, 2427-2440.
15. Yuan, W.; Eriksson, L.; Szabó, K. J., *Angew. Chem. Int. Ed.* **2016**, *55*, 8410-8415.
